# Supplementary material
Source: publisher figshare collection journal article supplement (https://plos.figshare.com/articles/dataset/_/6731846)

AMA-1:Bead Coupling

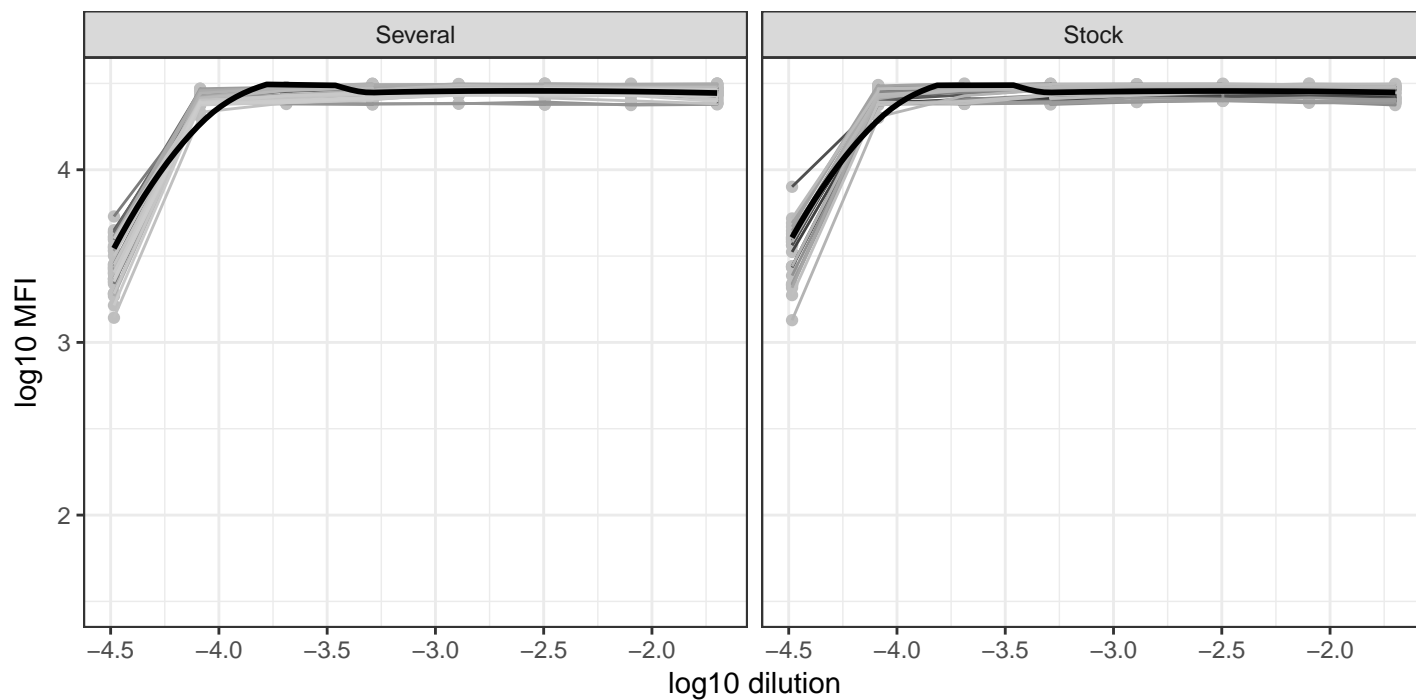

MSP-1 42:Bead Coupling

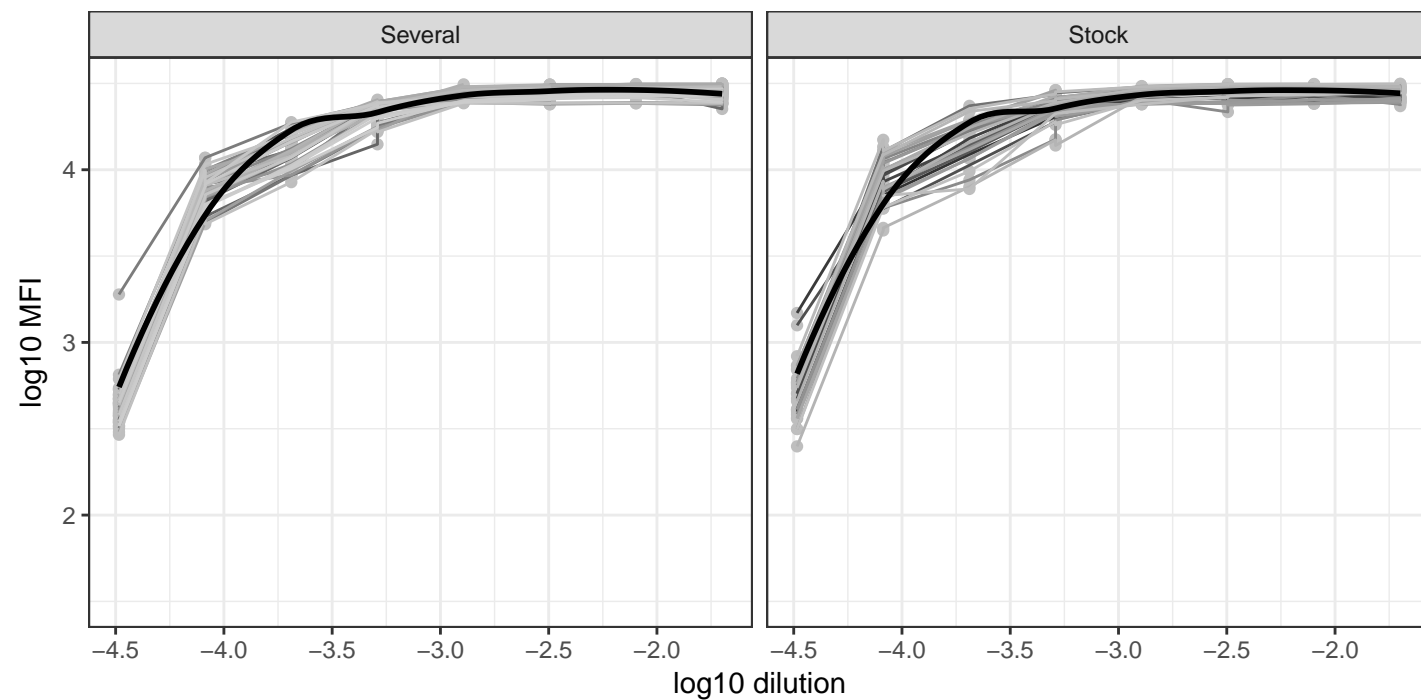

AMA-1:Predilution

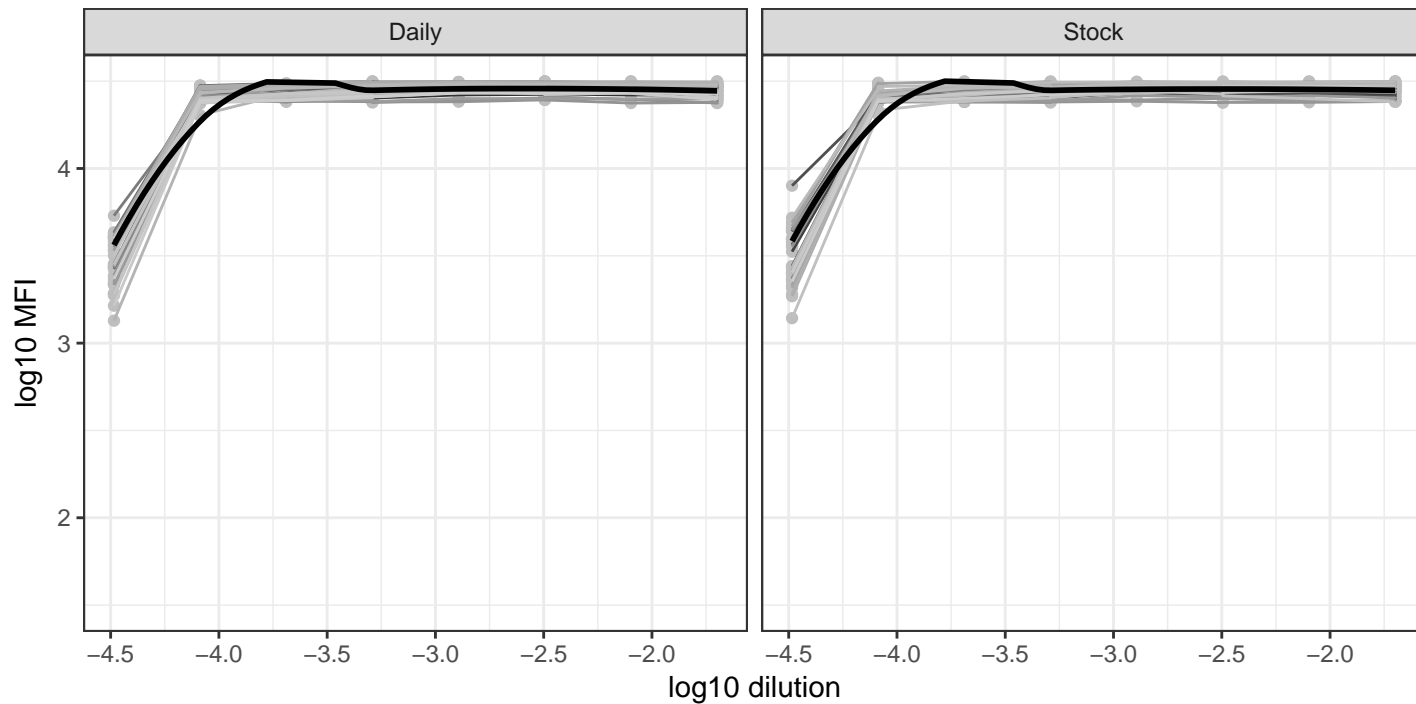

MSP-1 42:Predilution

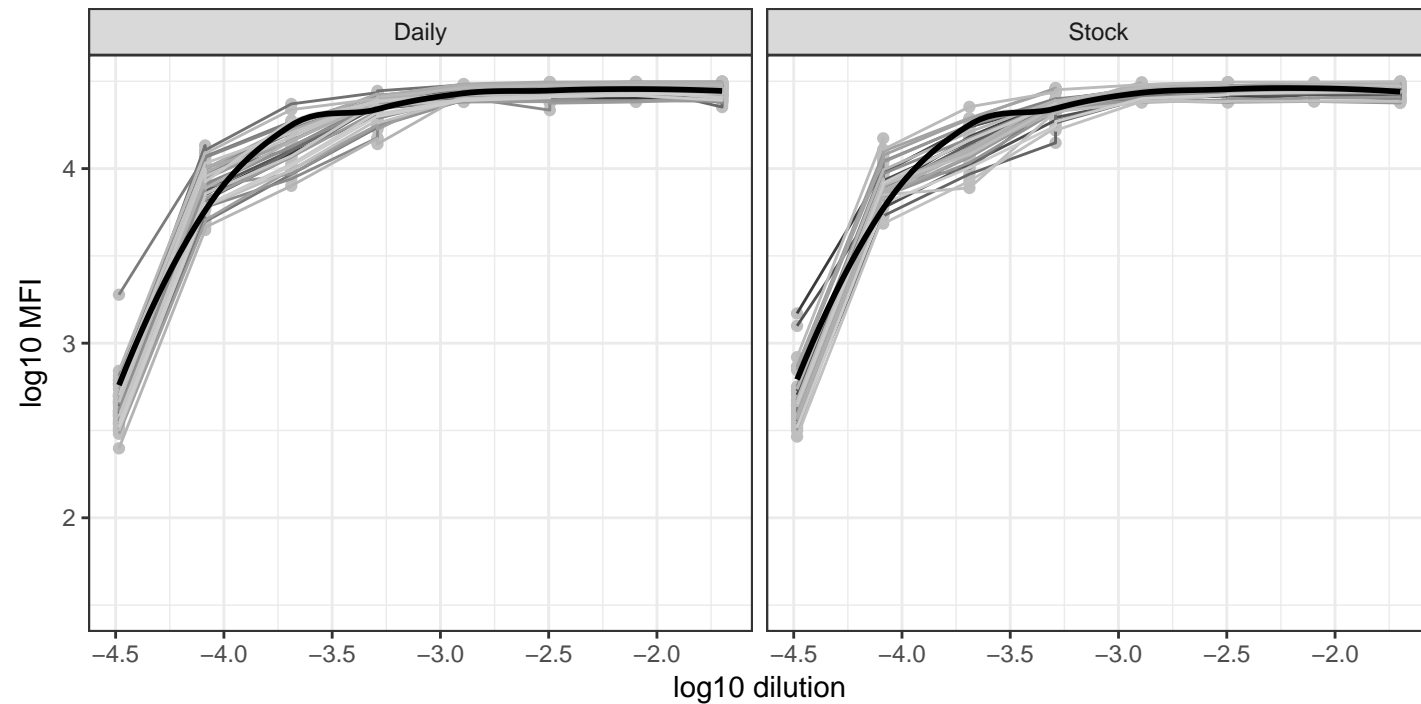

AMA-1:Temperature

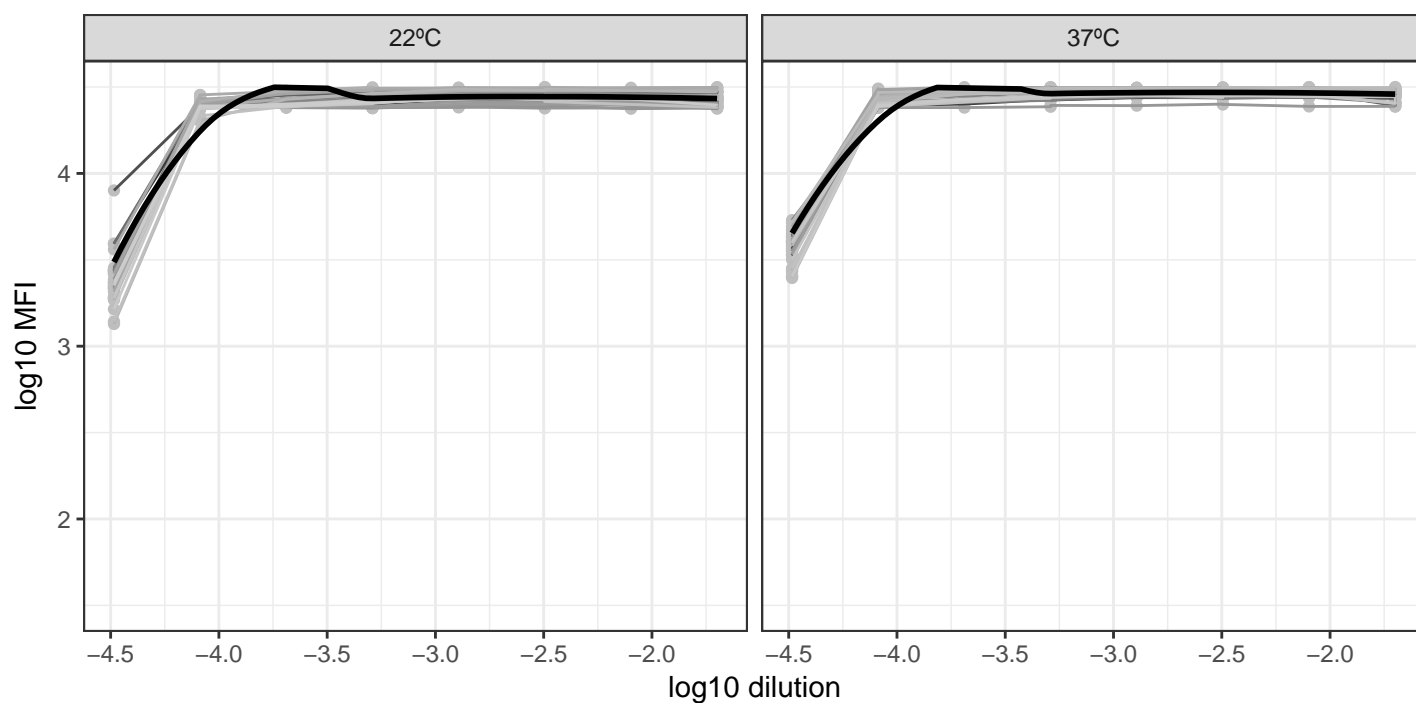

MSP-1 42:Temperature

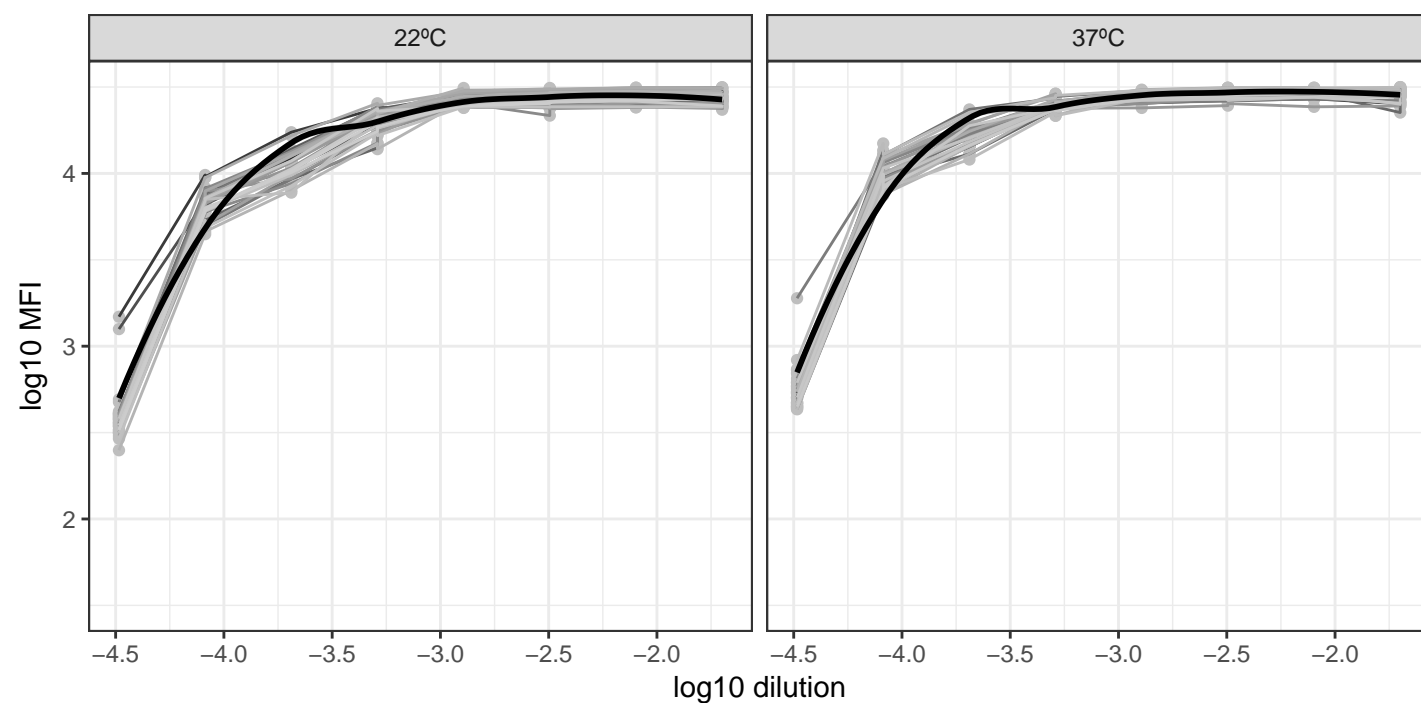

AMA-1:Wash

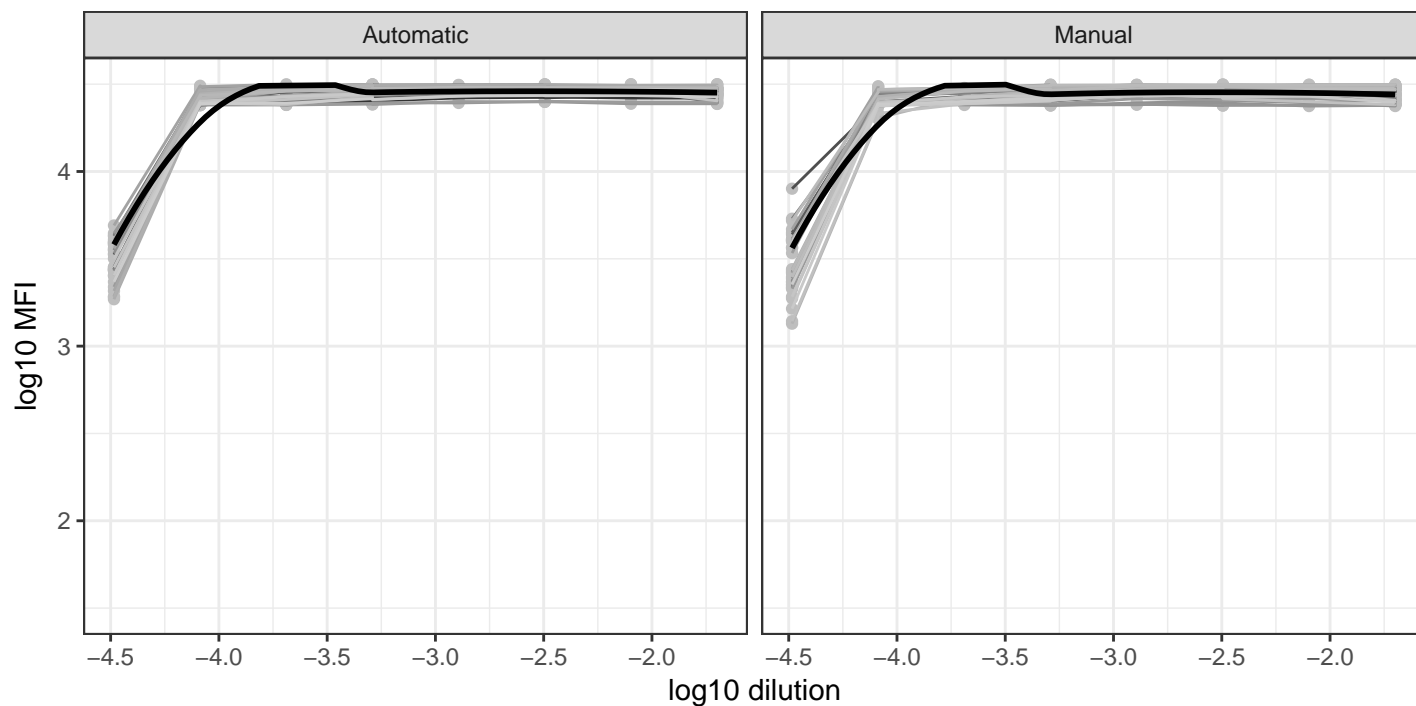

MSP-1 42:Wash

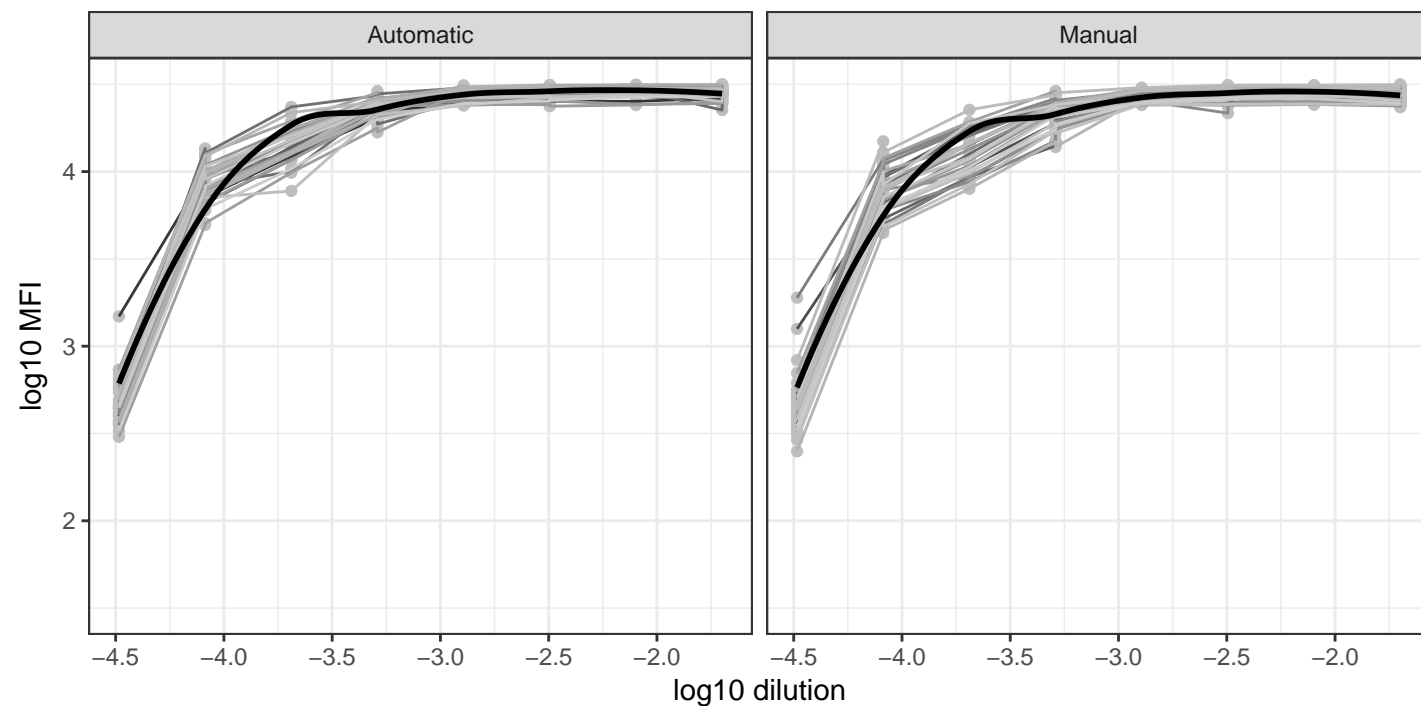

AMA-1:Operator

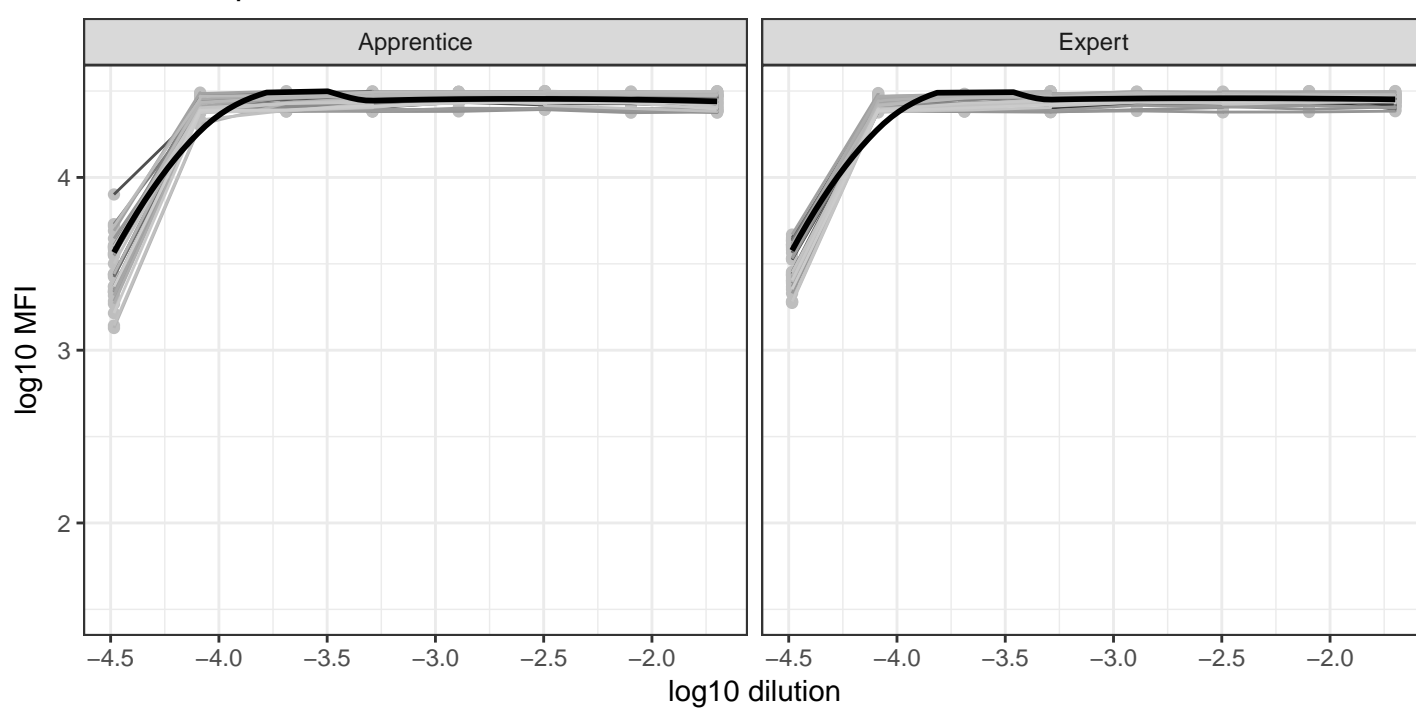

MSP-1 42:Operator

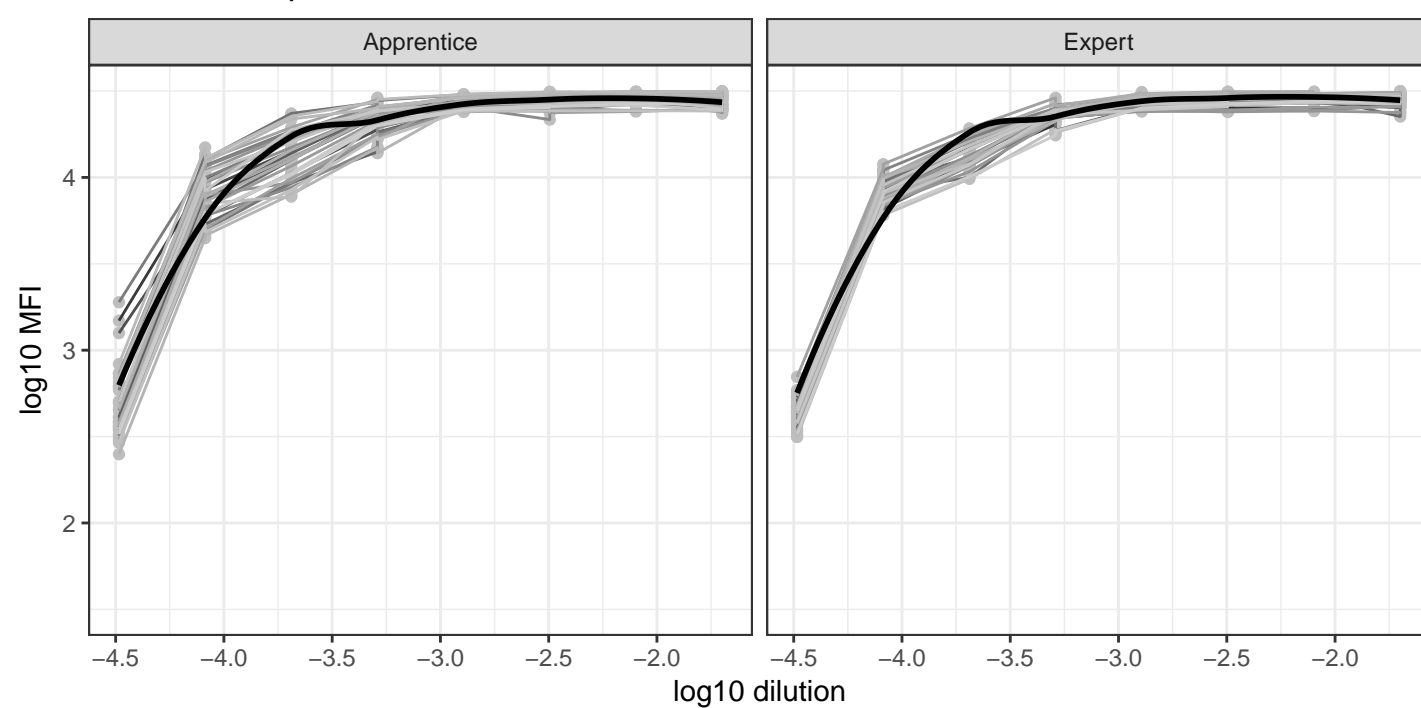

EBA-175:Bead Coupling

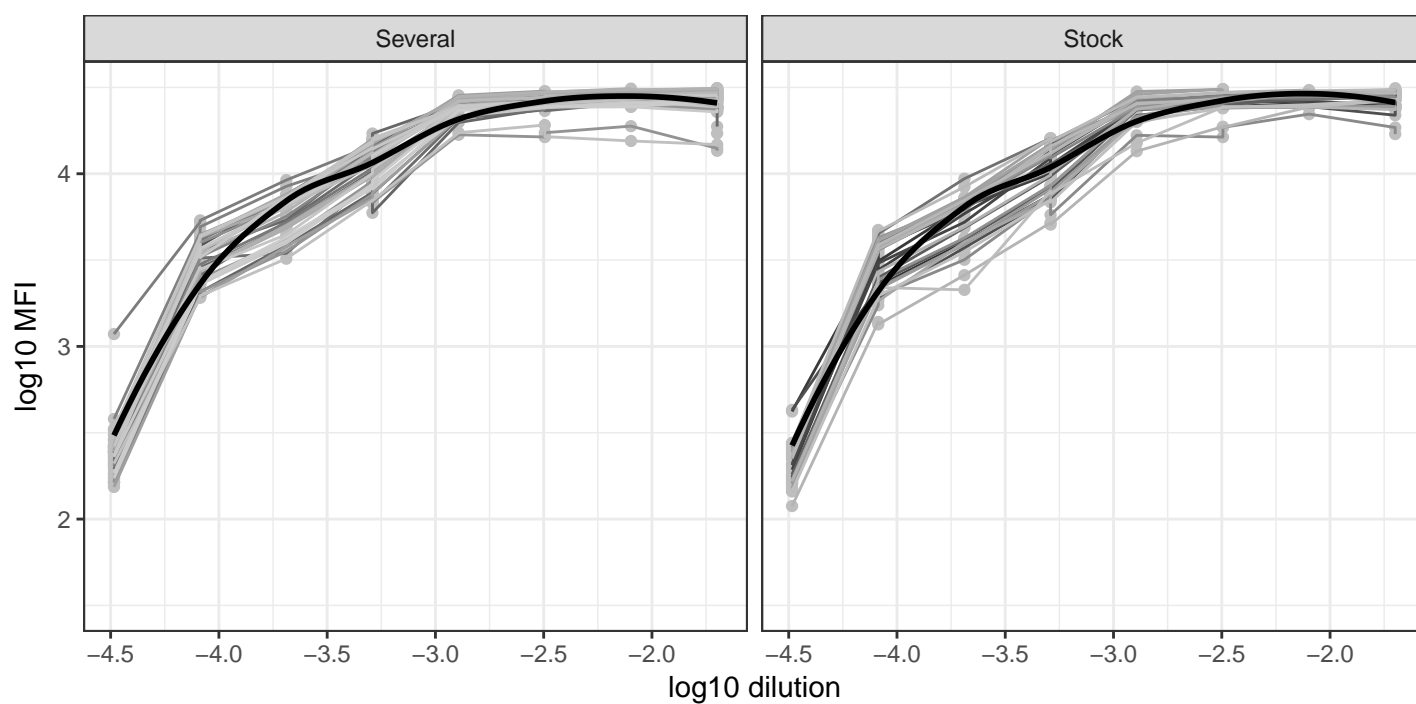

RH5:Bead Coupling

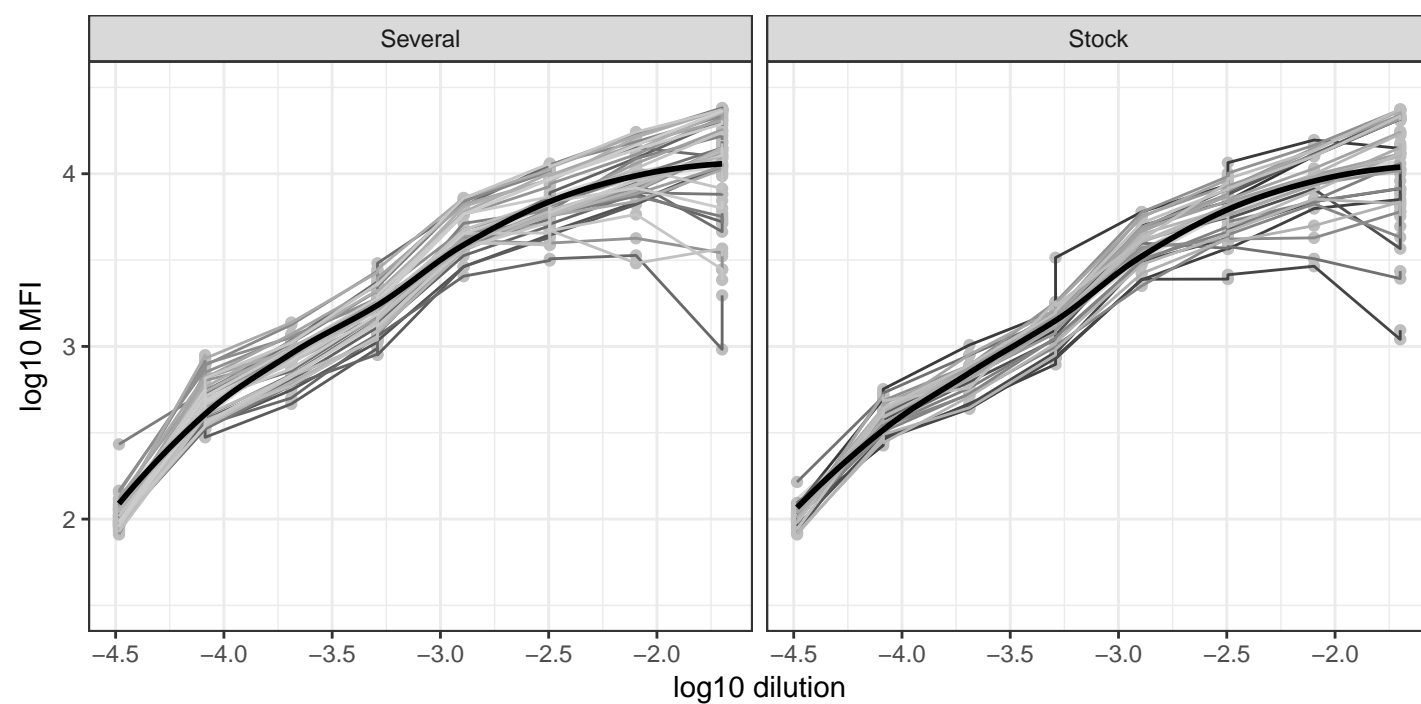

EBA-175:Predilution

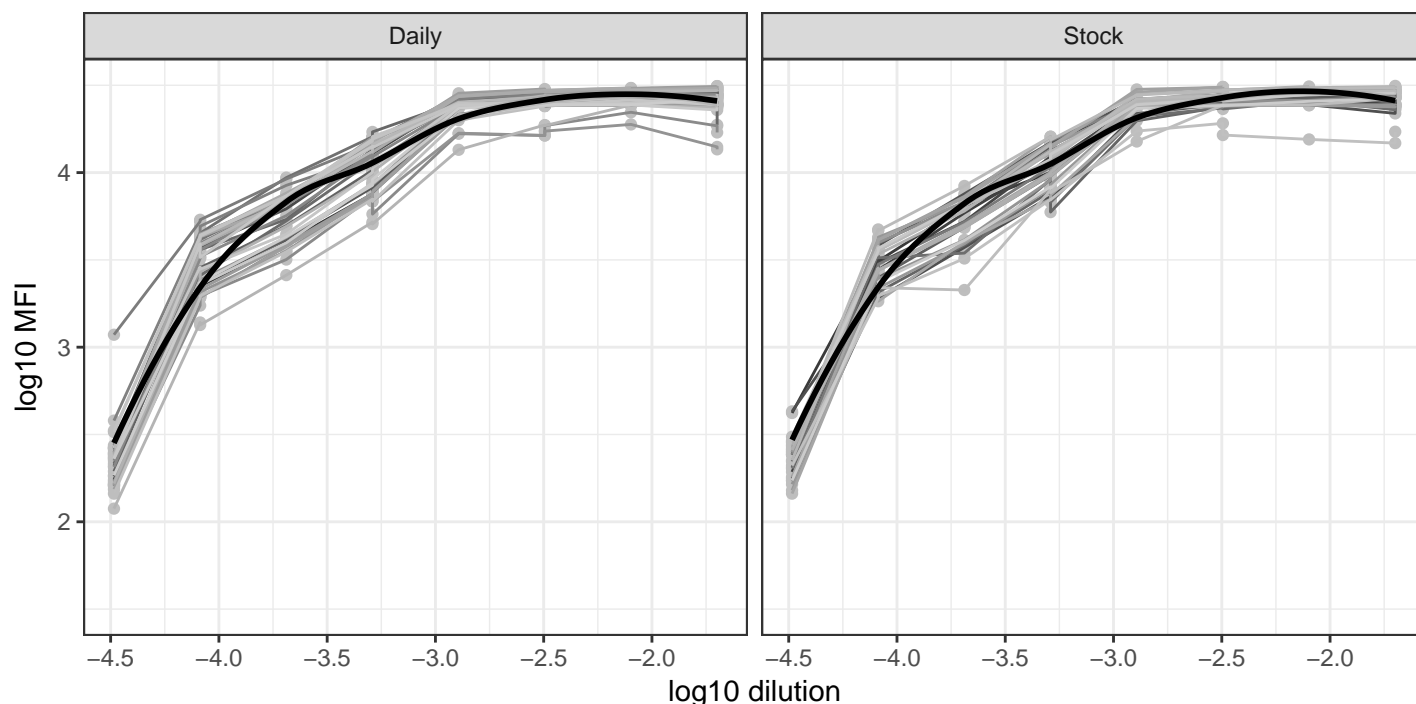

RH5:Predilution

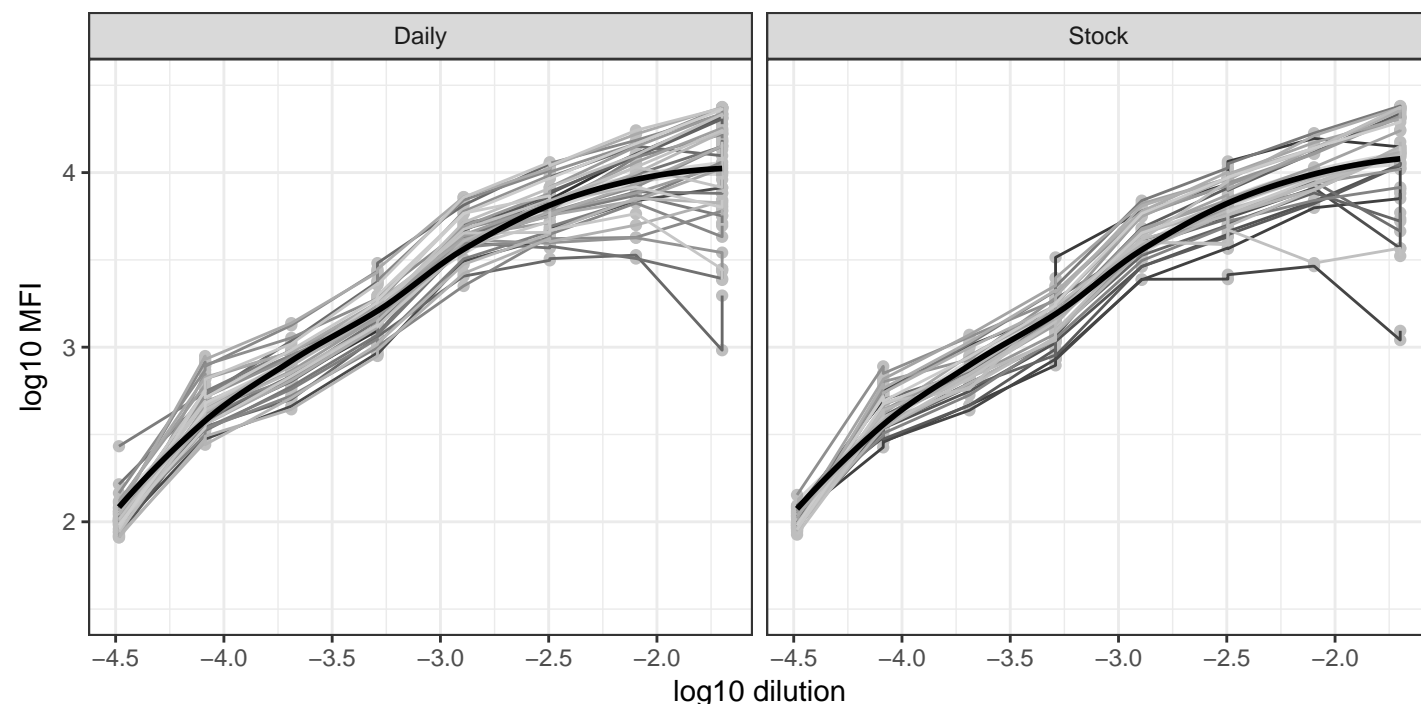

EBA-175:Temperature

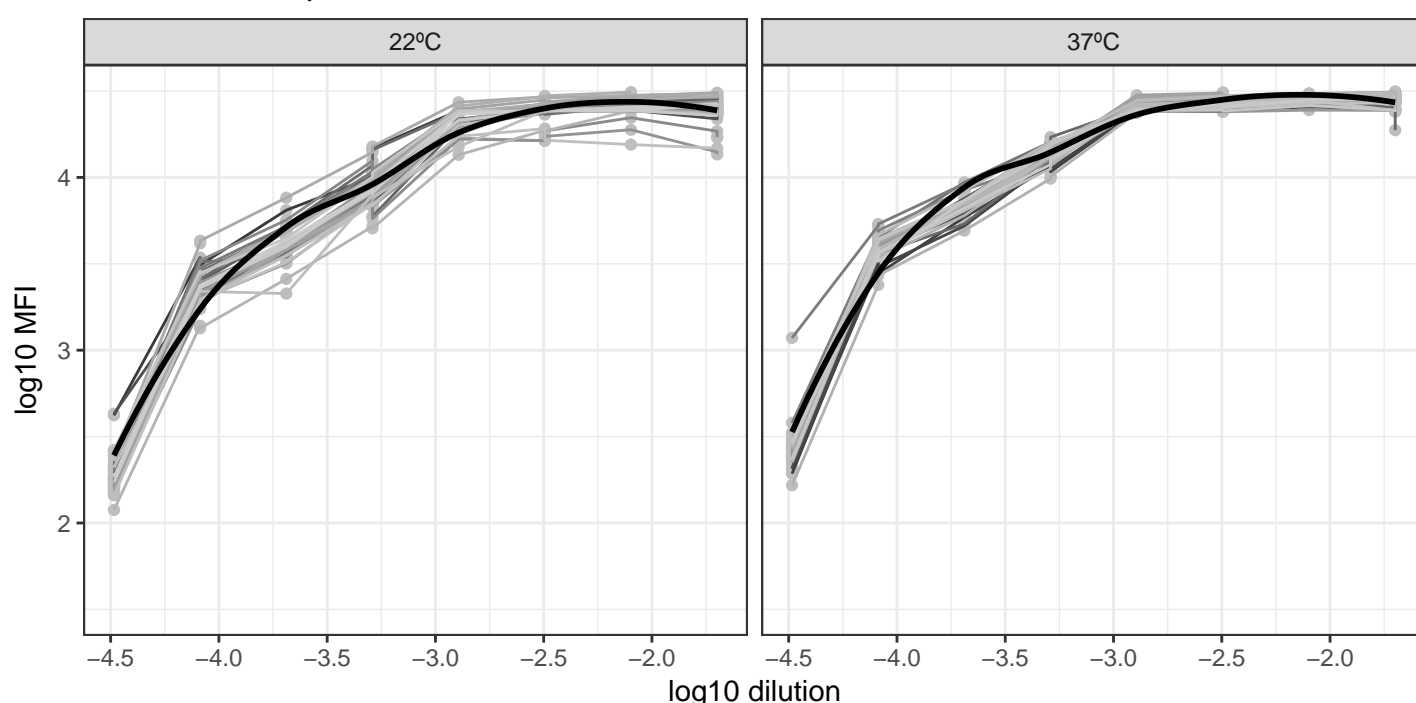

RH5:Temperature

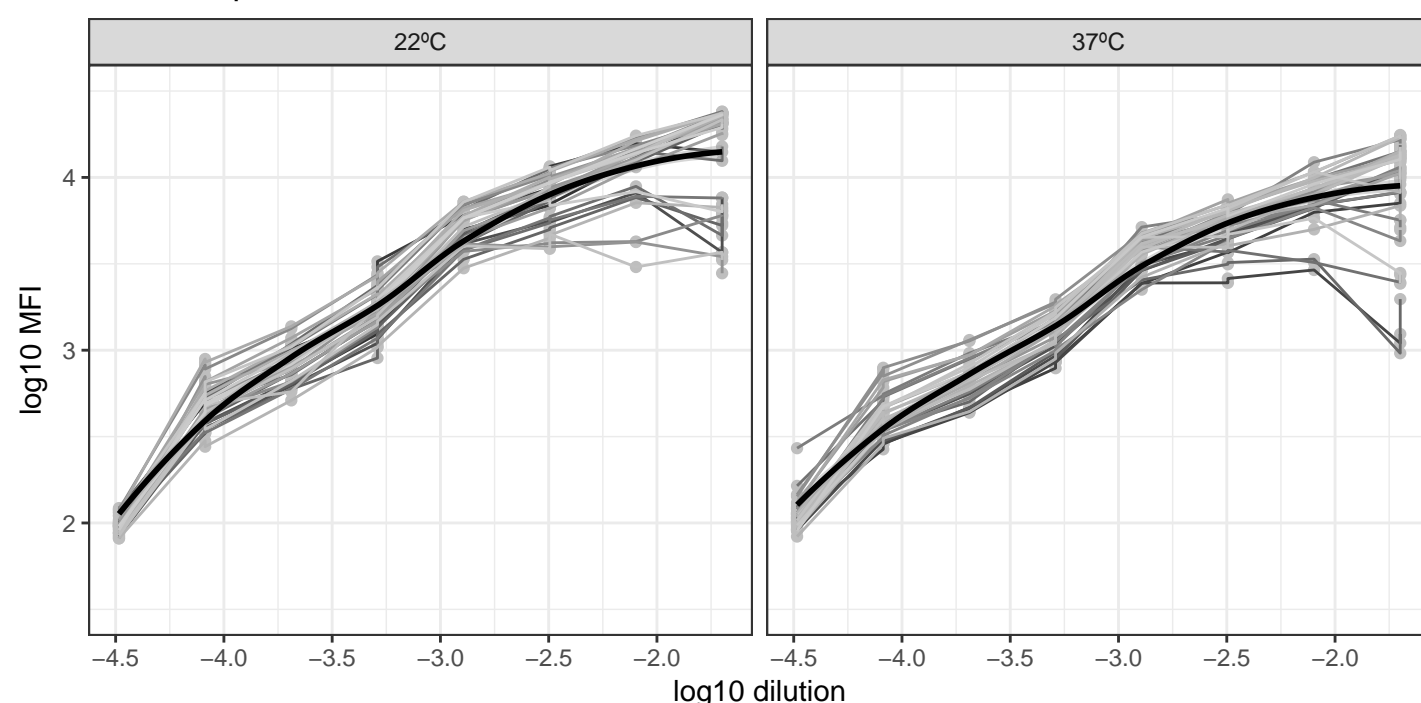

EBA-175:Wash

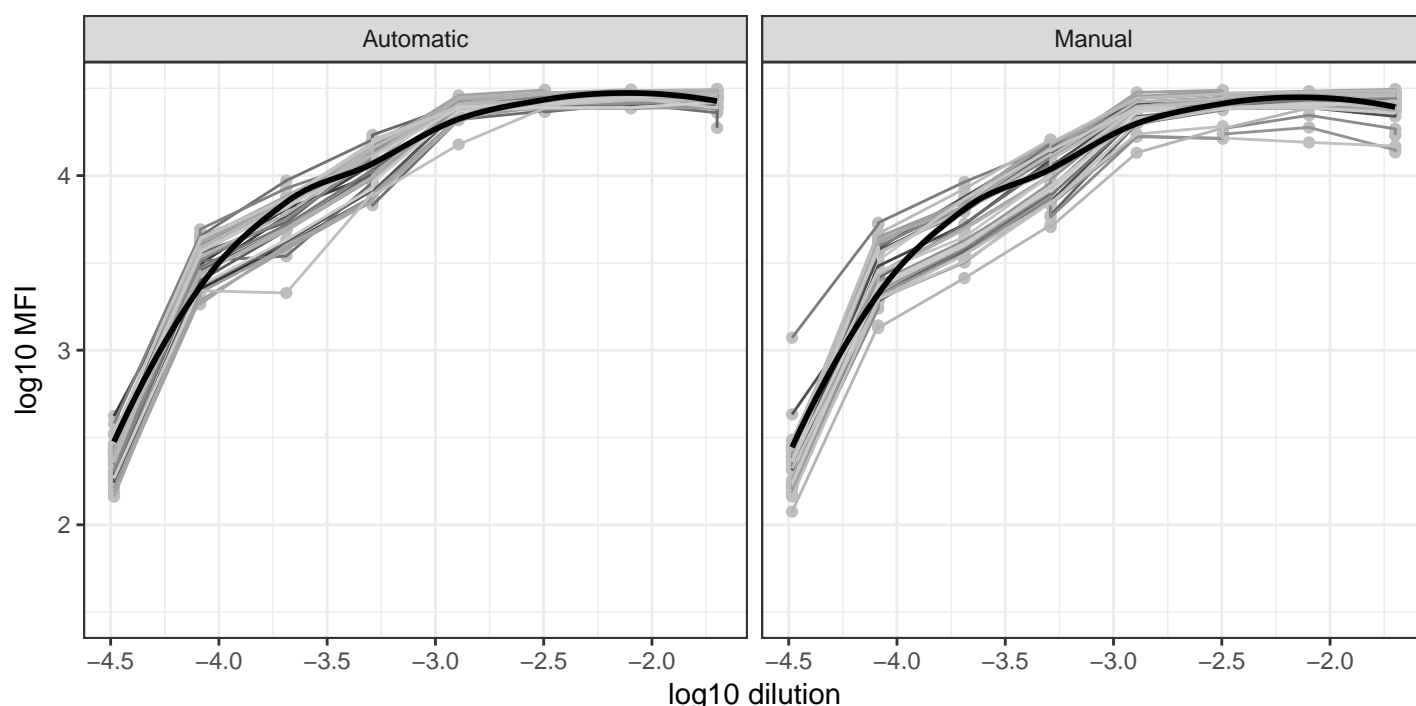

RH5:Wash

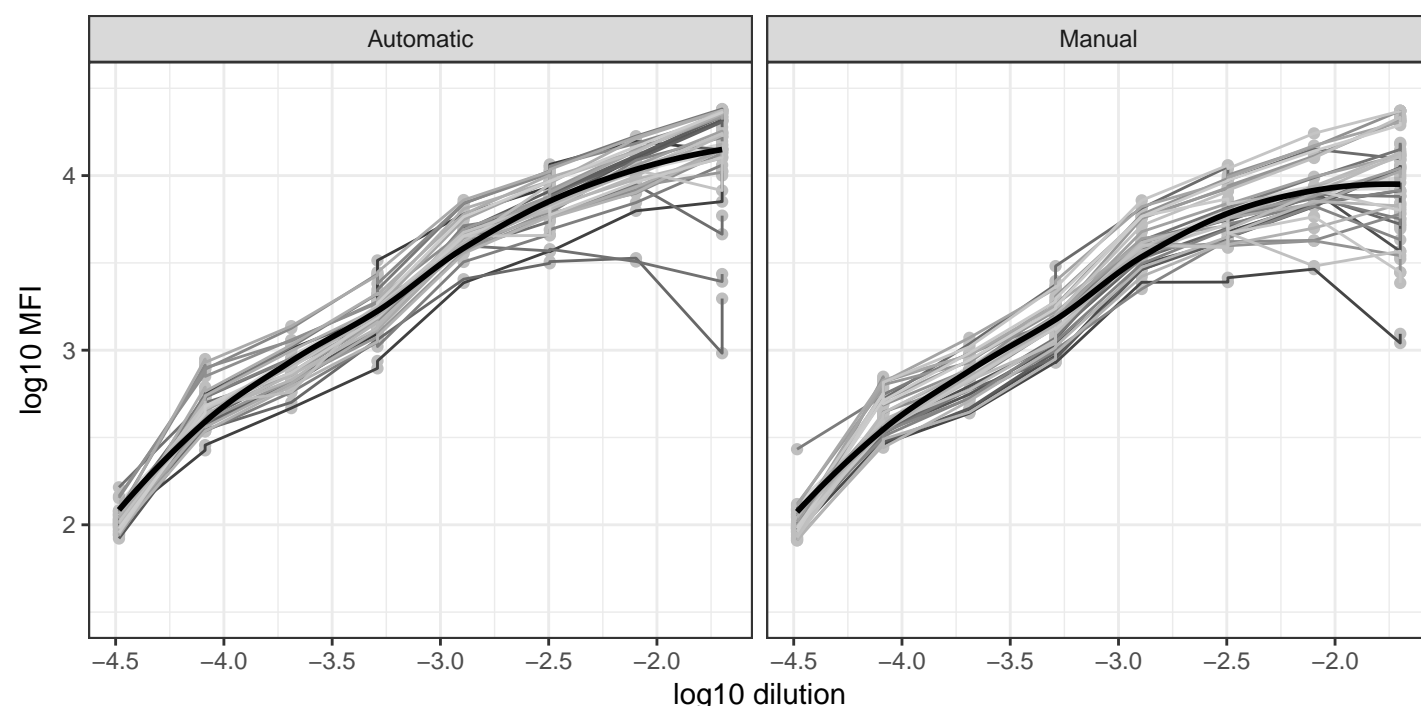

EBA-175:Operator

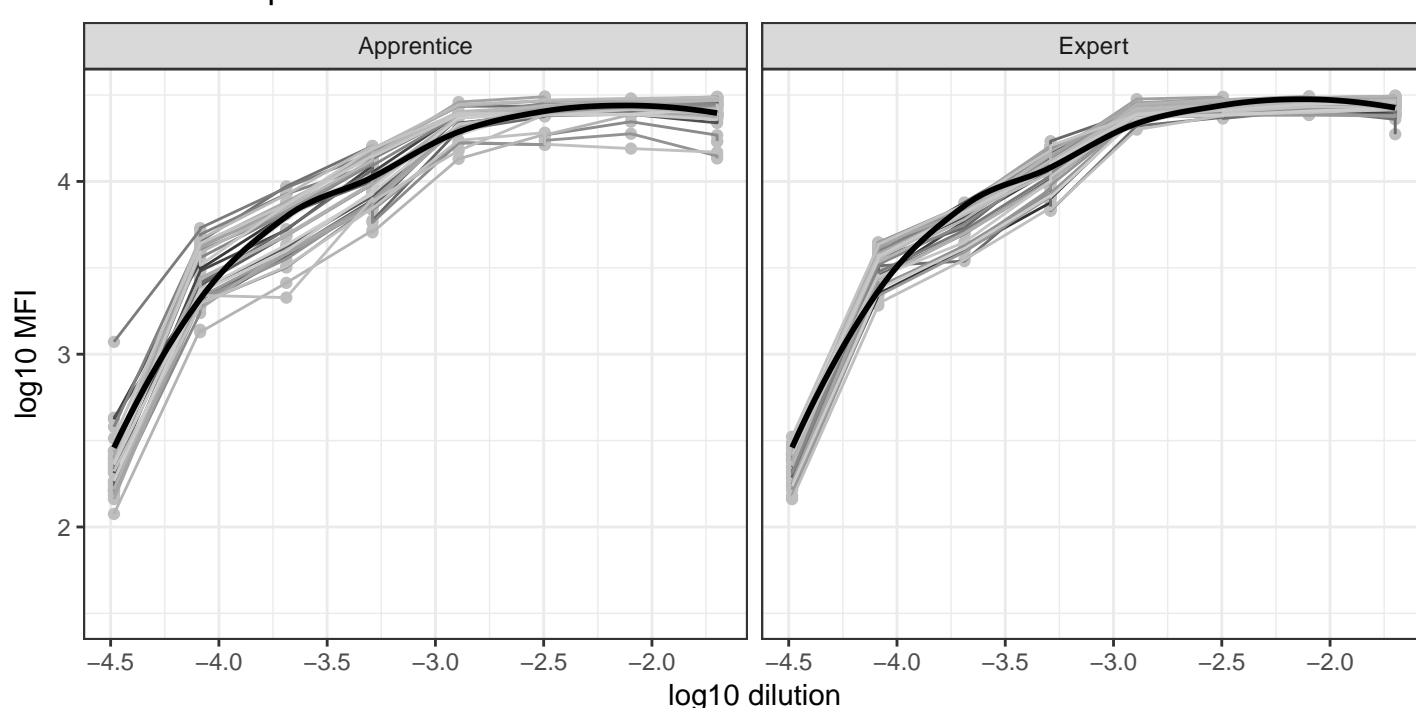

RH5:Operator

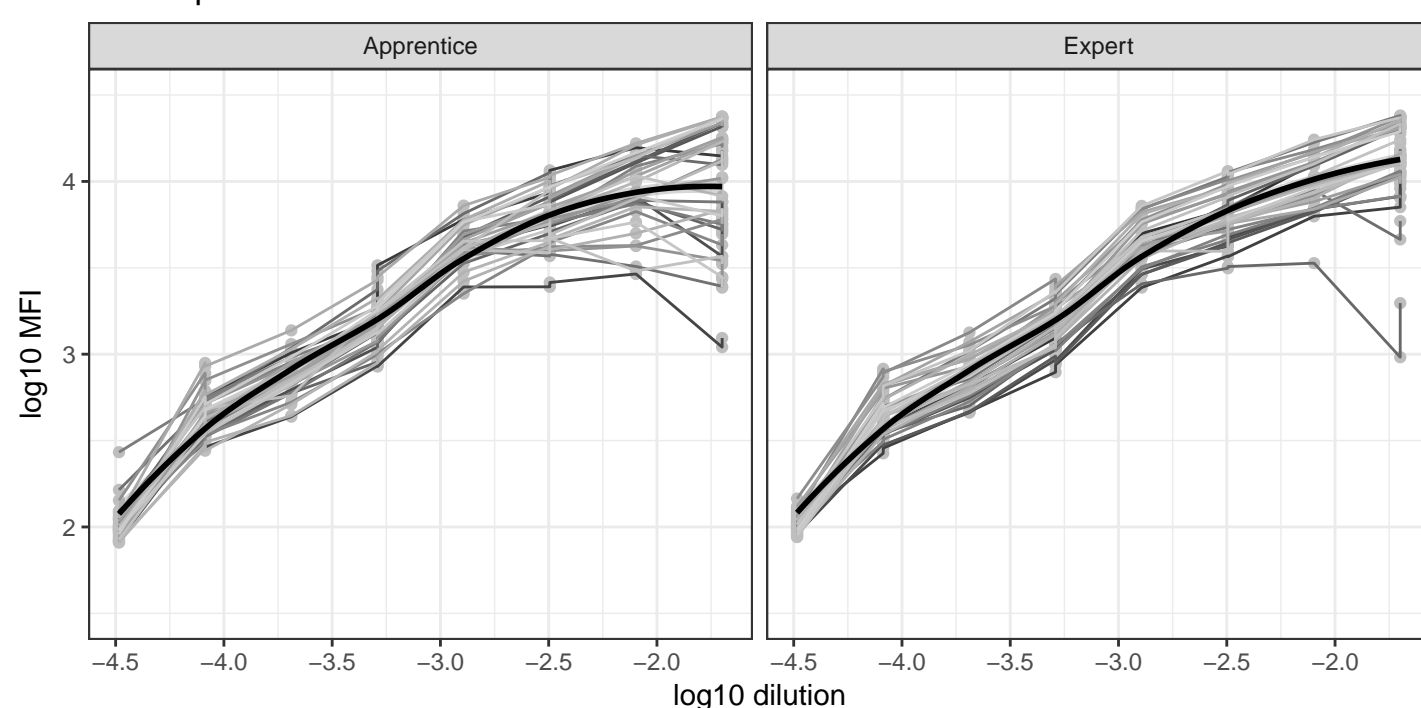

LSA-1:Bead Coupling

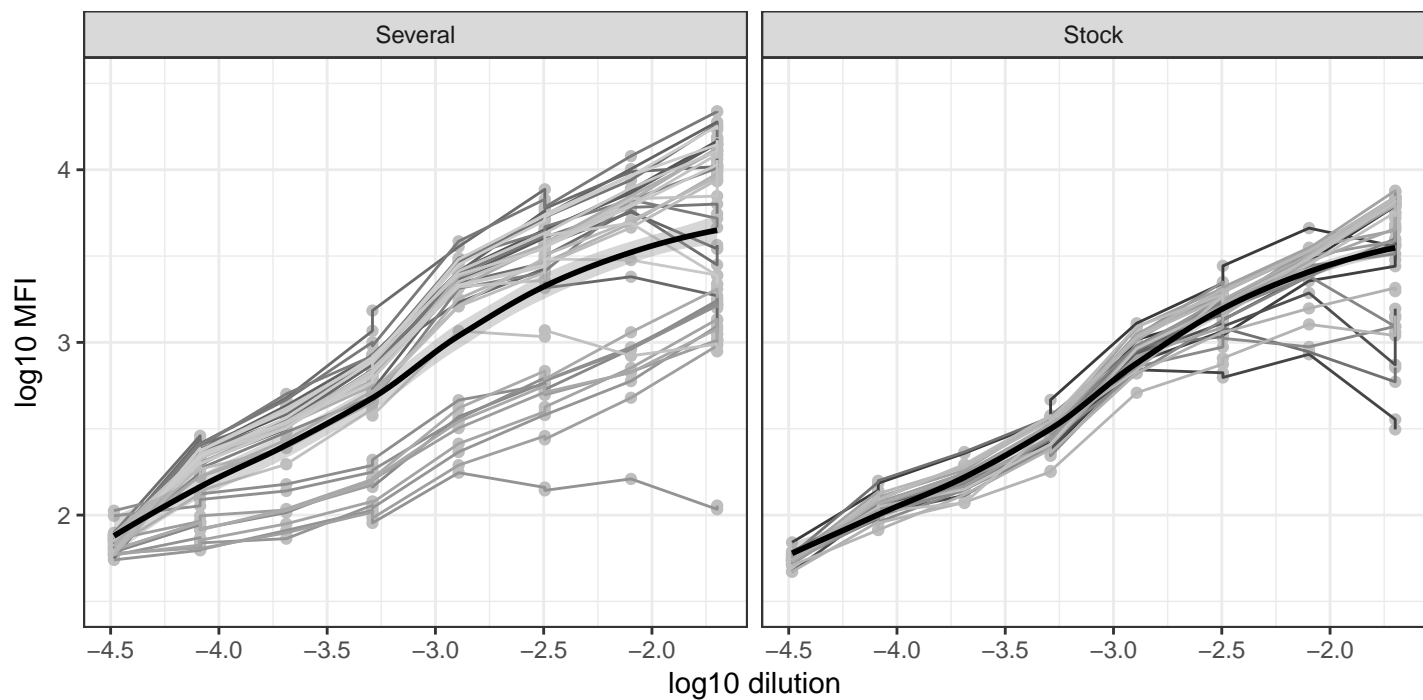

SSP2:Bead Coupling

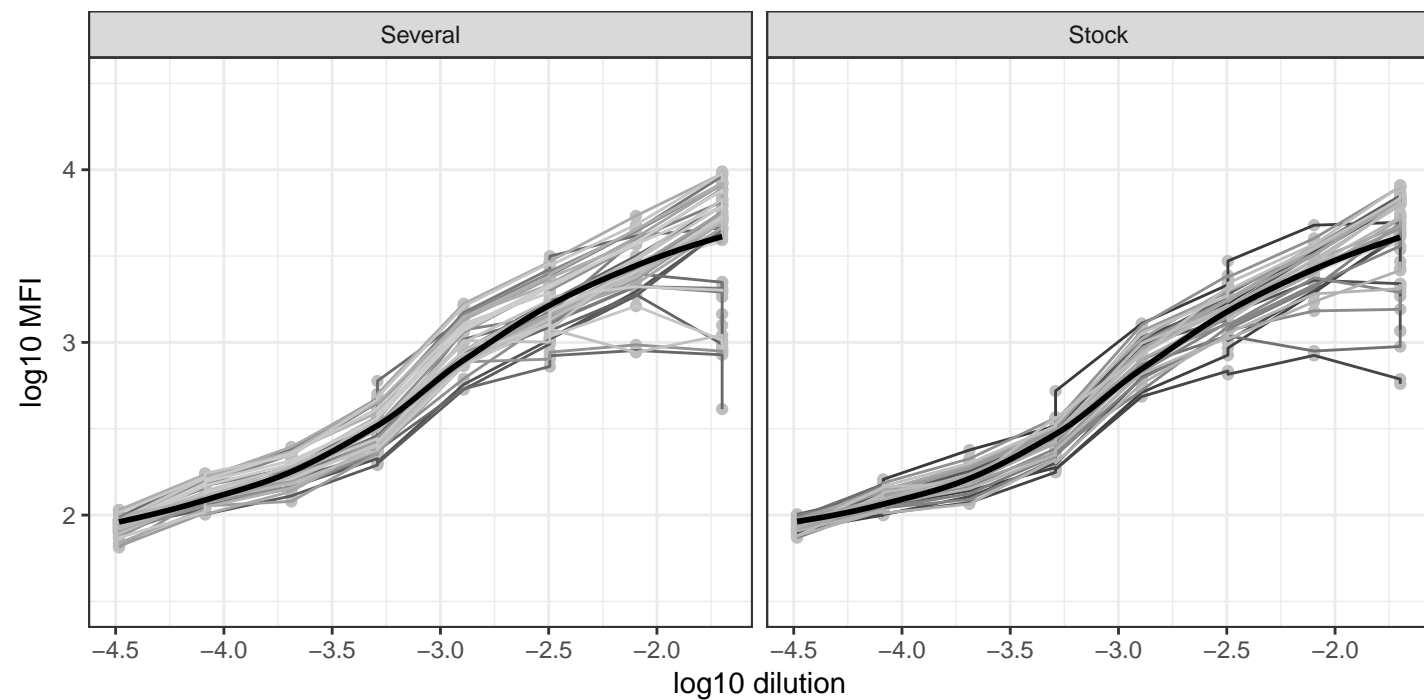

LSA-1:Predilution

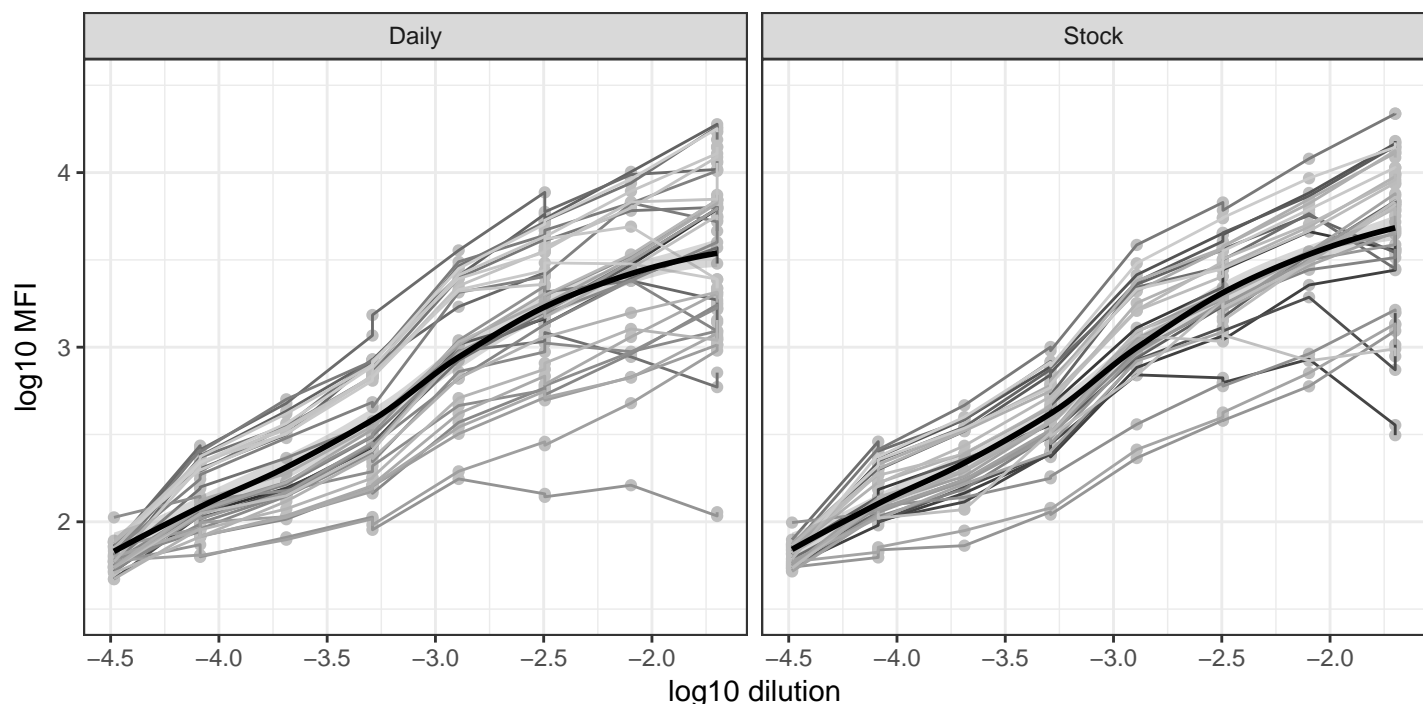

SSP2:Predilution

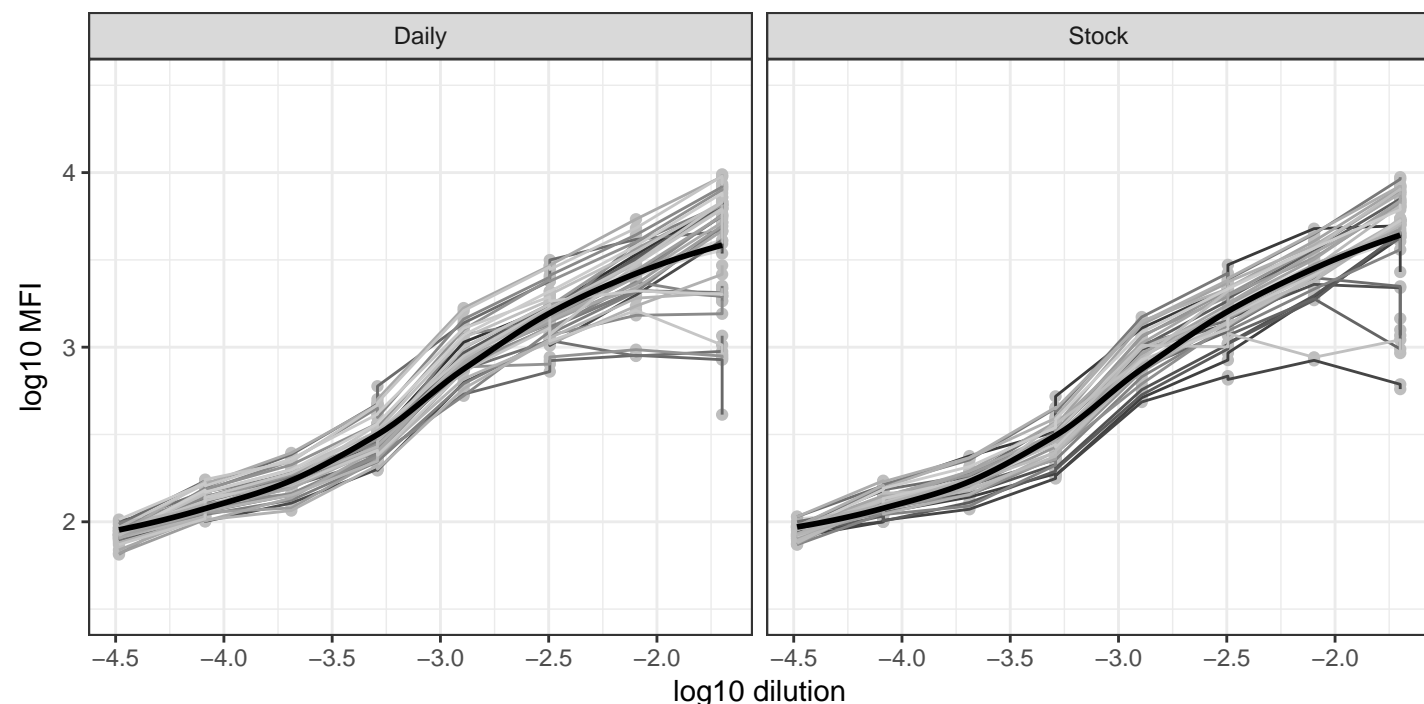

LSA-1:Temperature

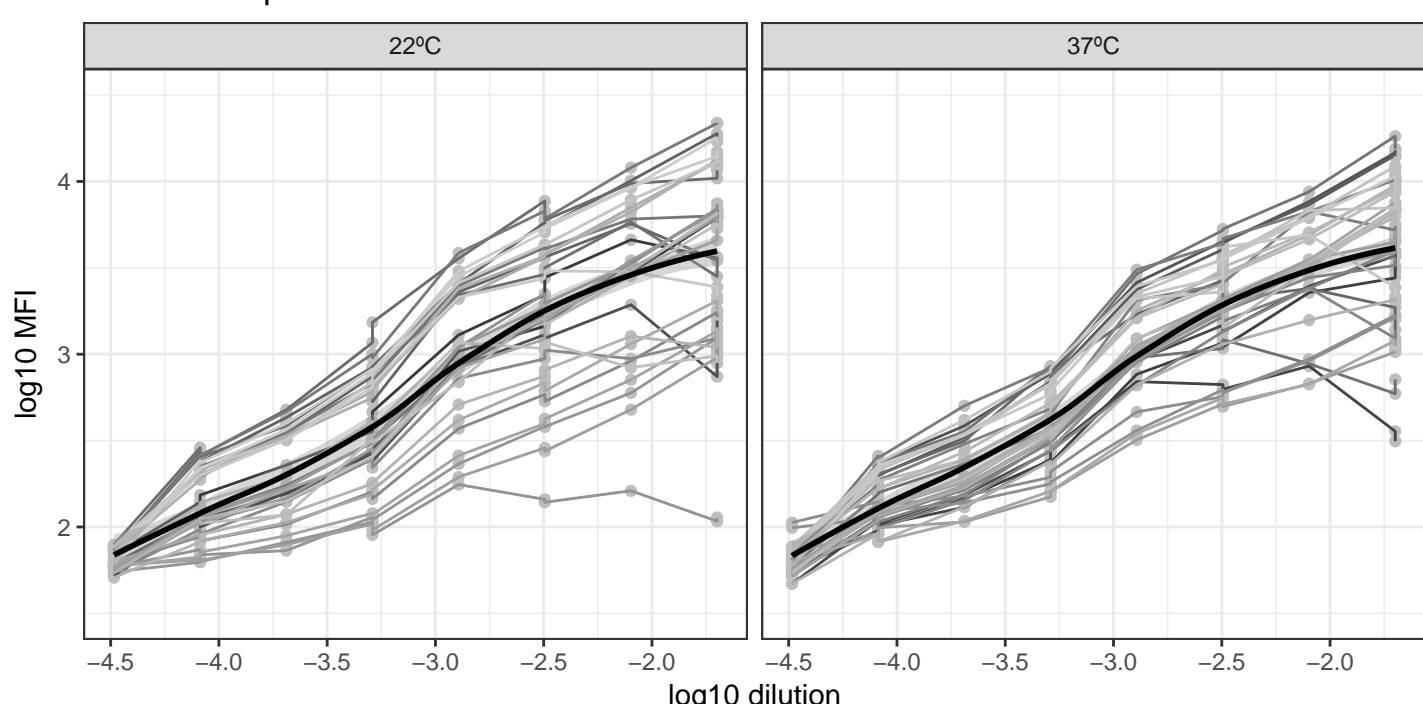

SSP2:Temperature

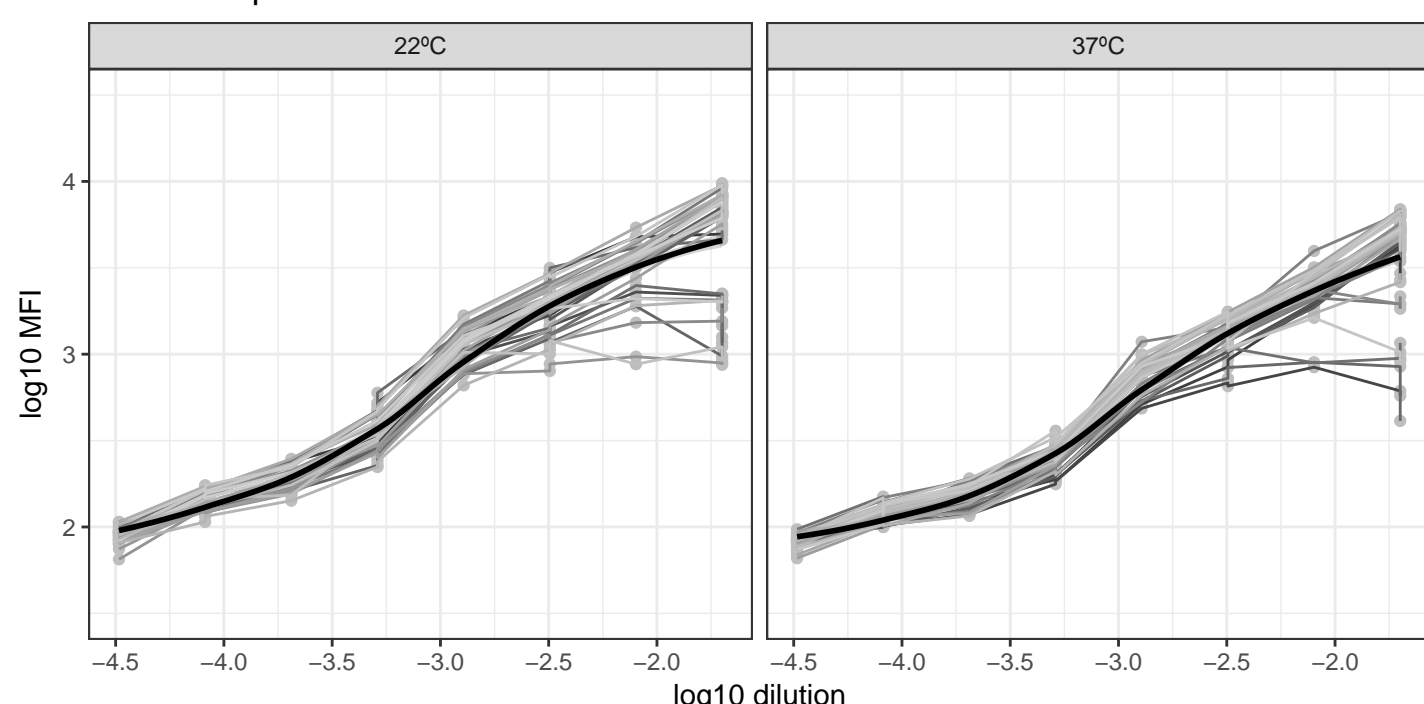

LSA-1:Wash

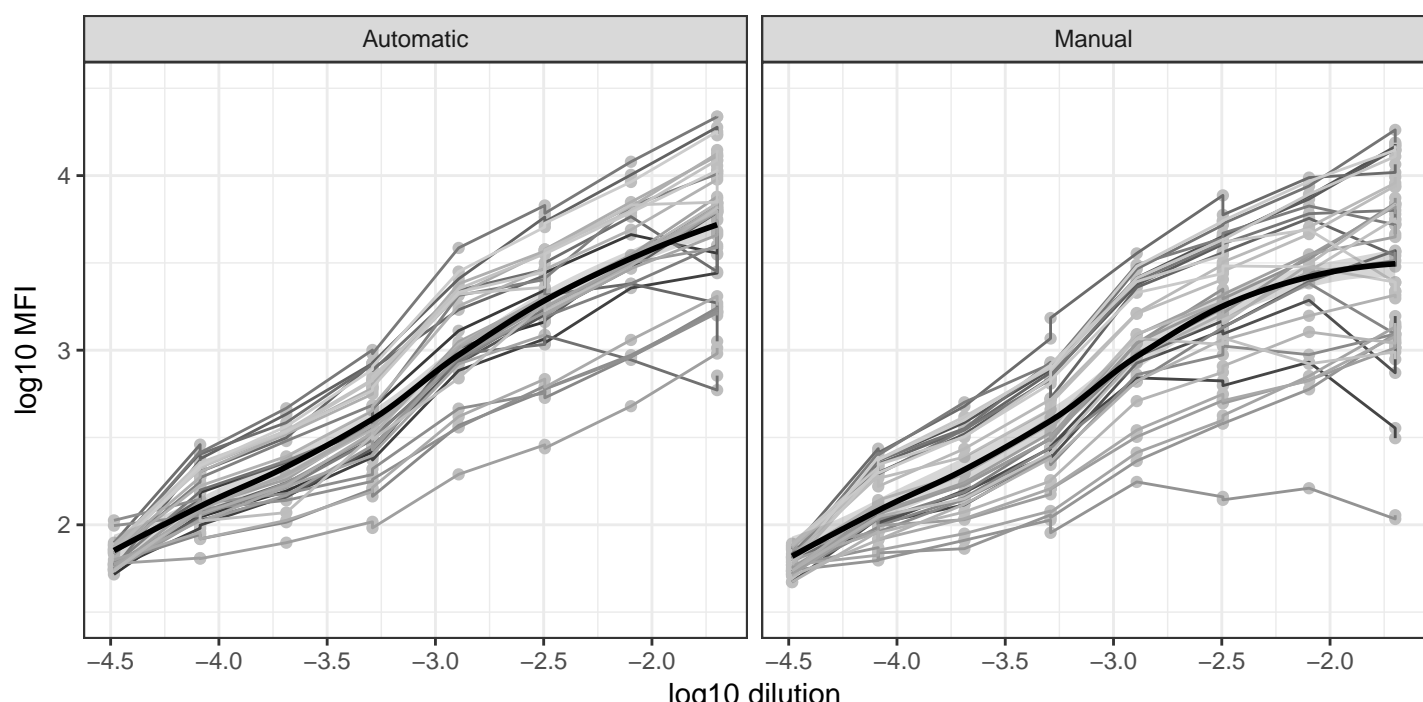

SSP2:Wash

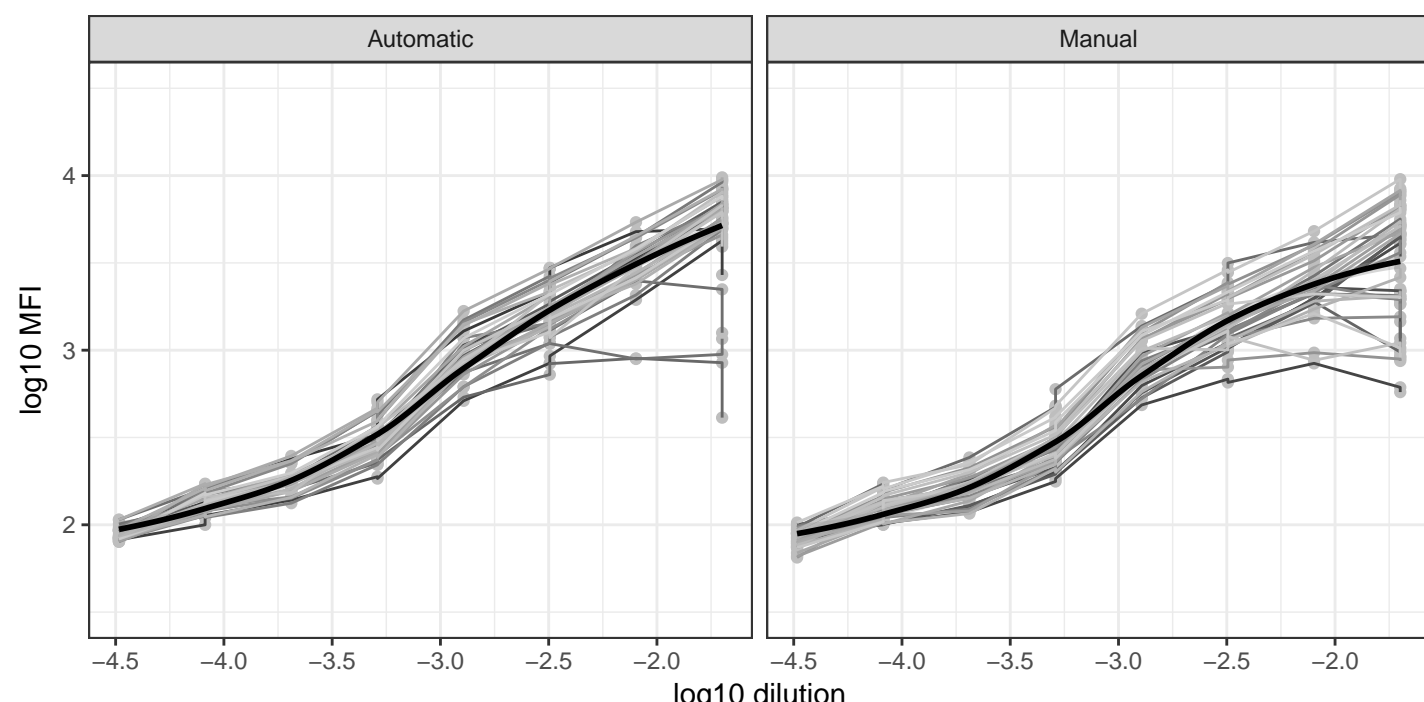

LSA-1:Operator

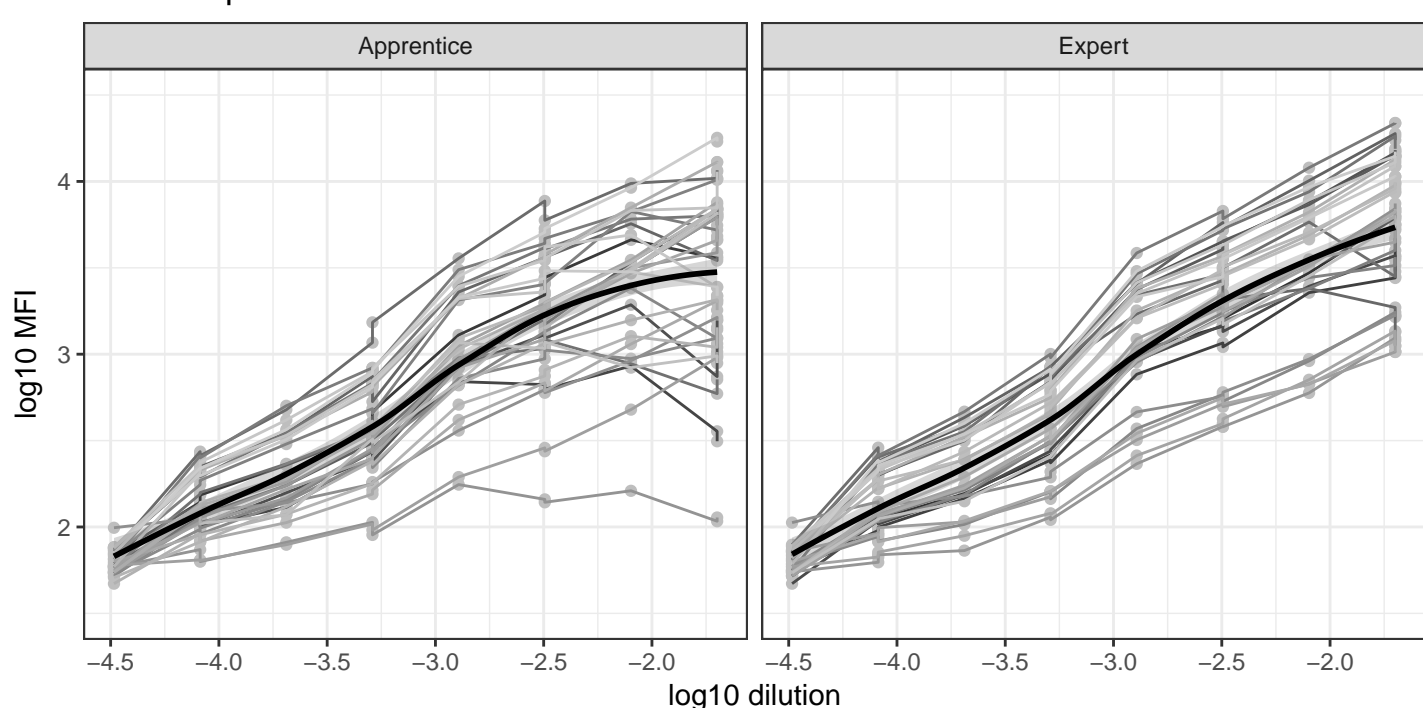

SSP2:Operator

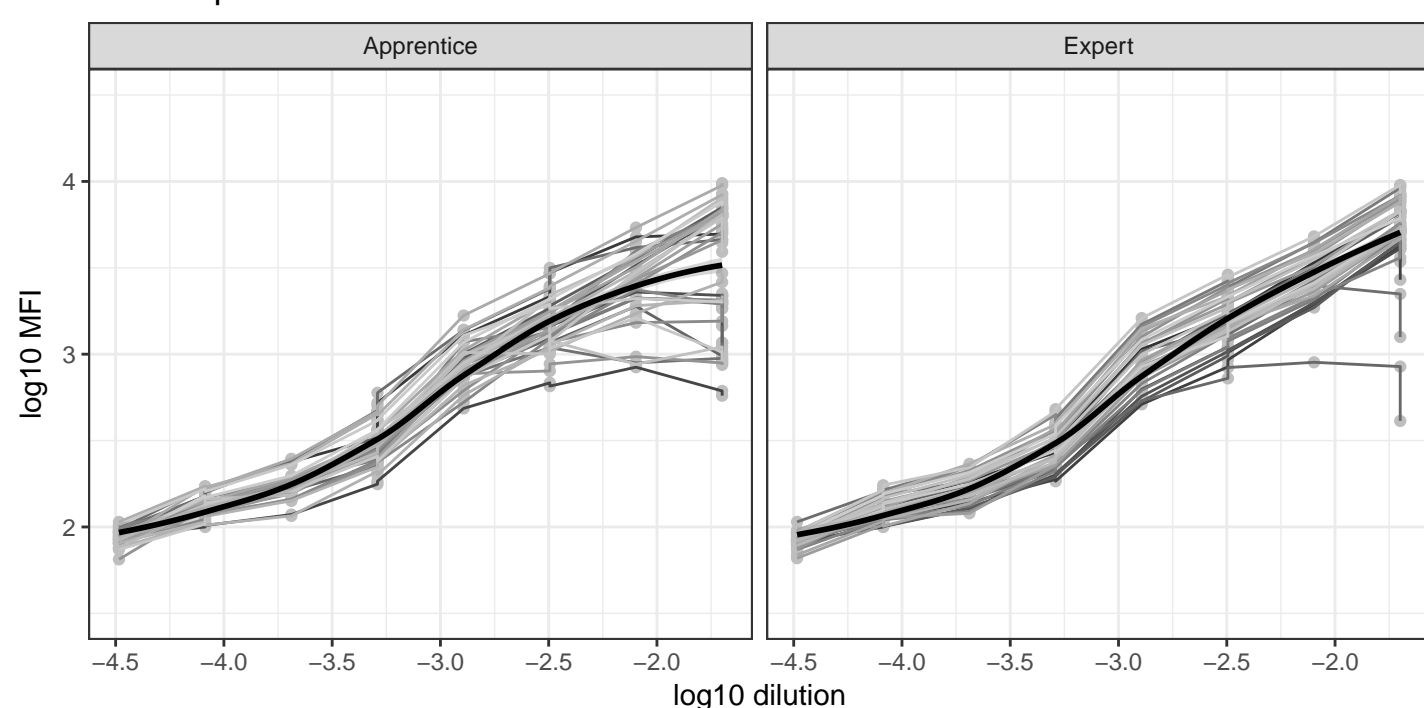

VAR2CSA:Bead Coupling

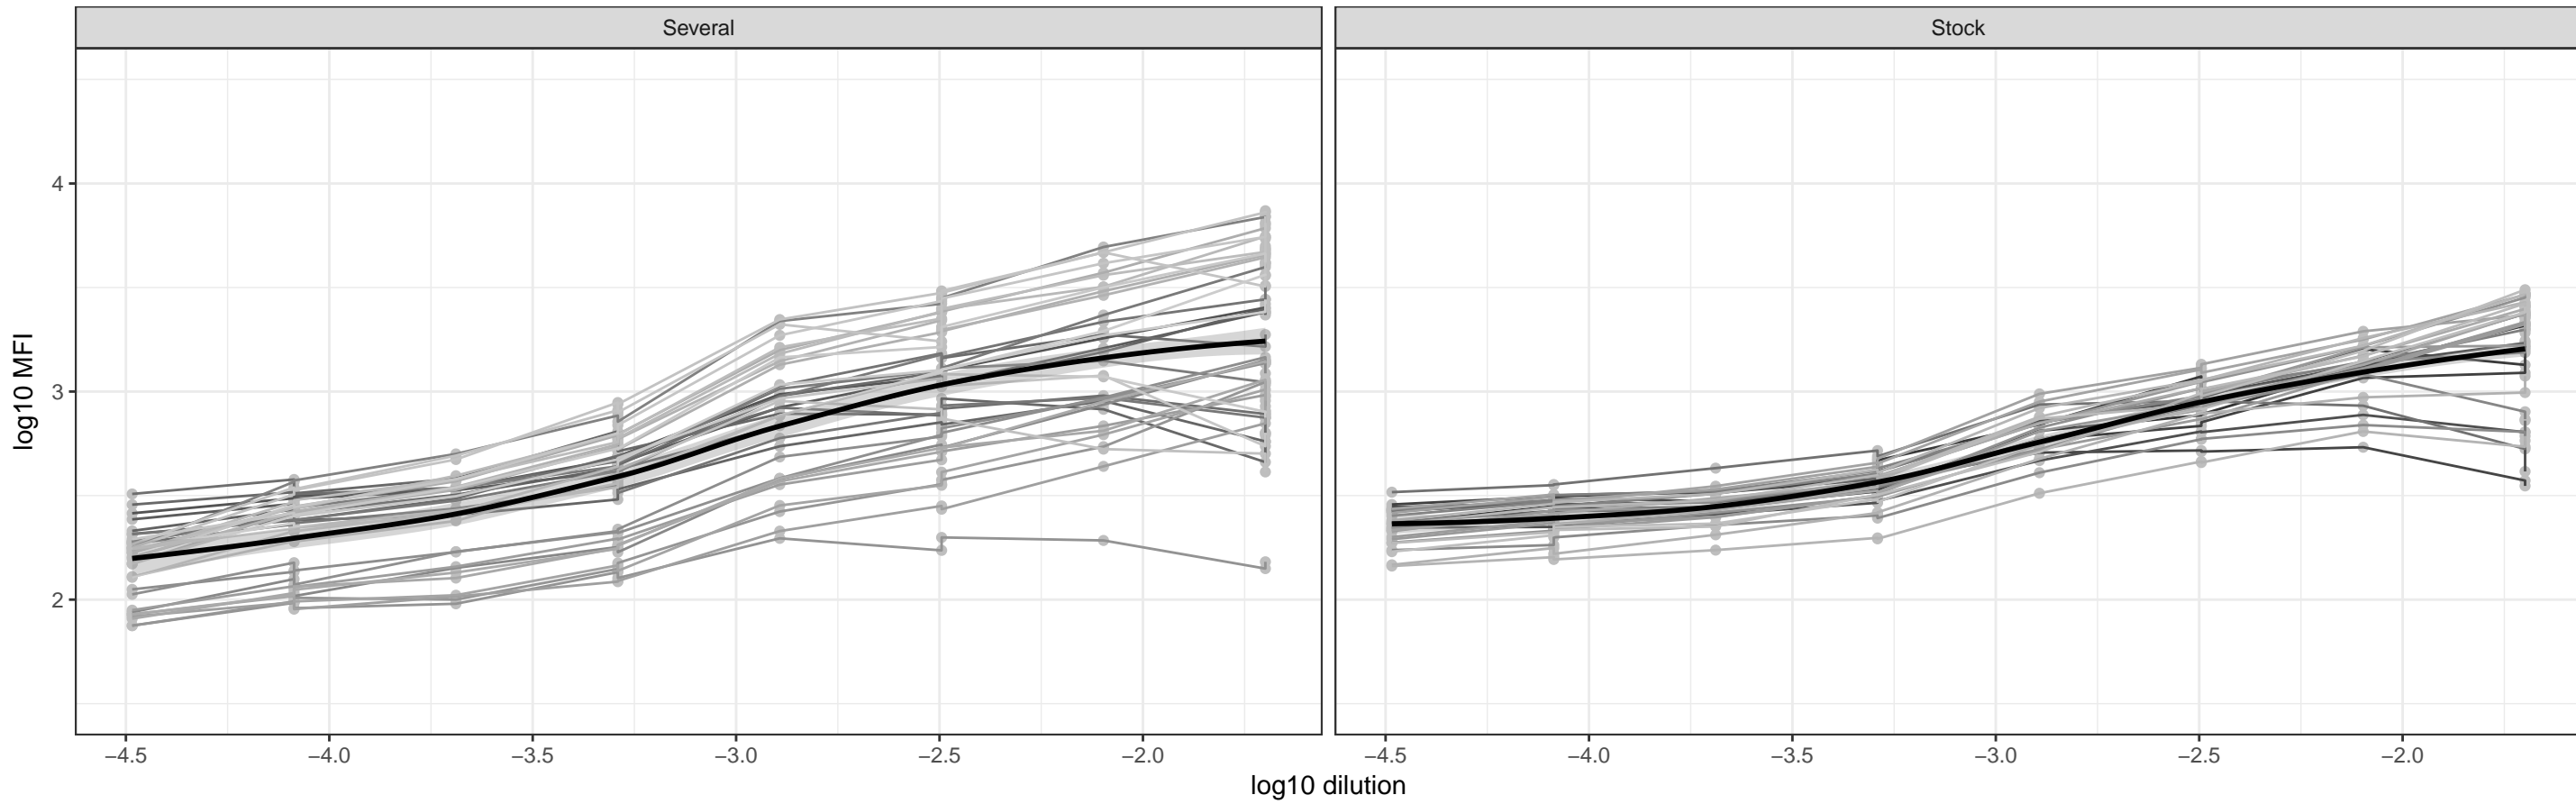

VAR2CSA:Predilution

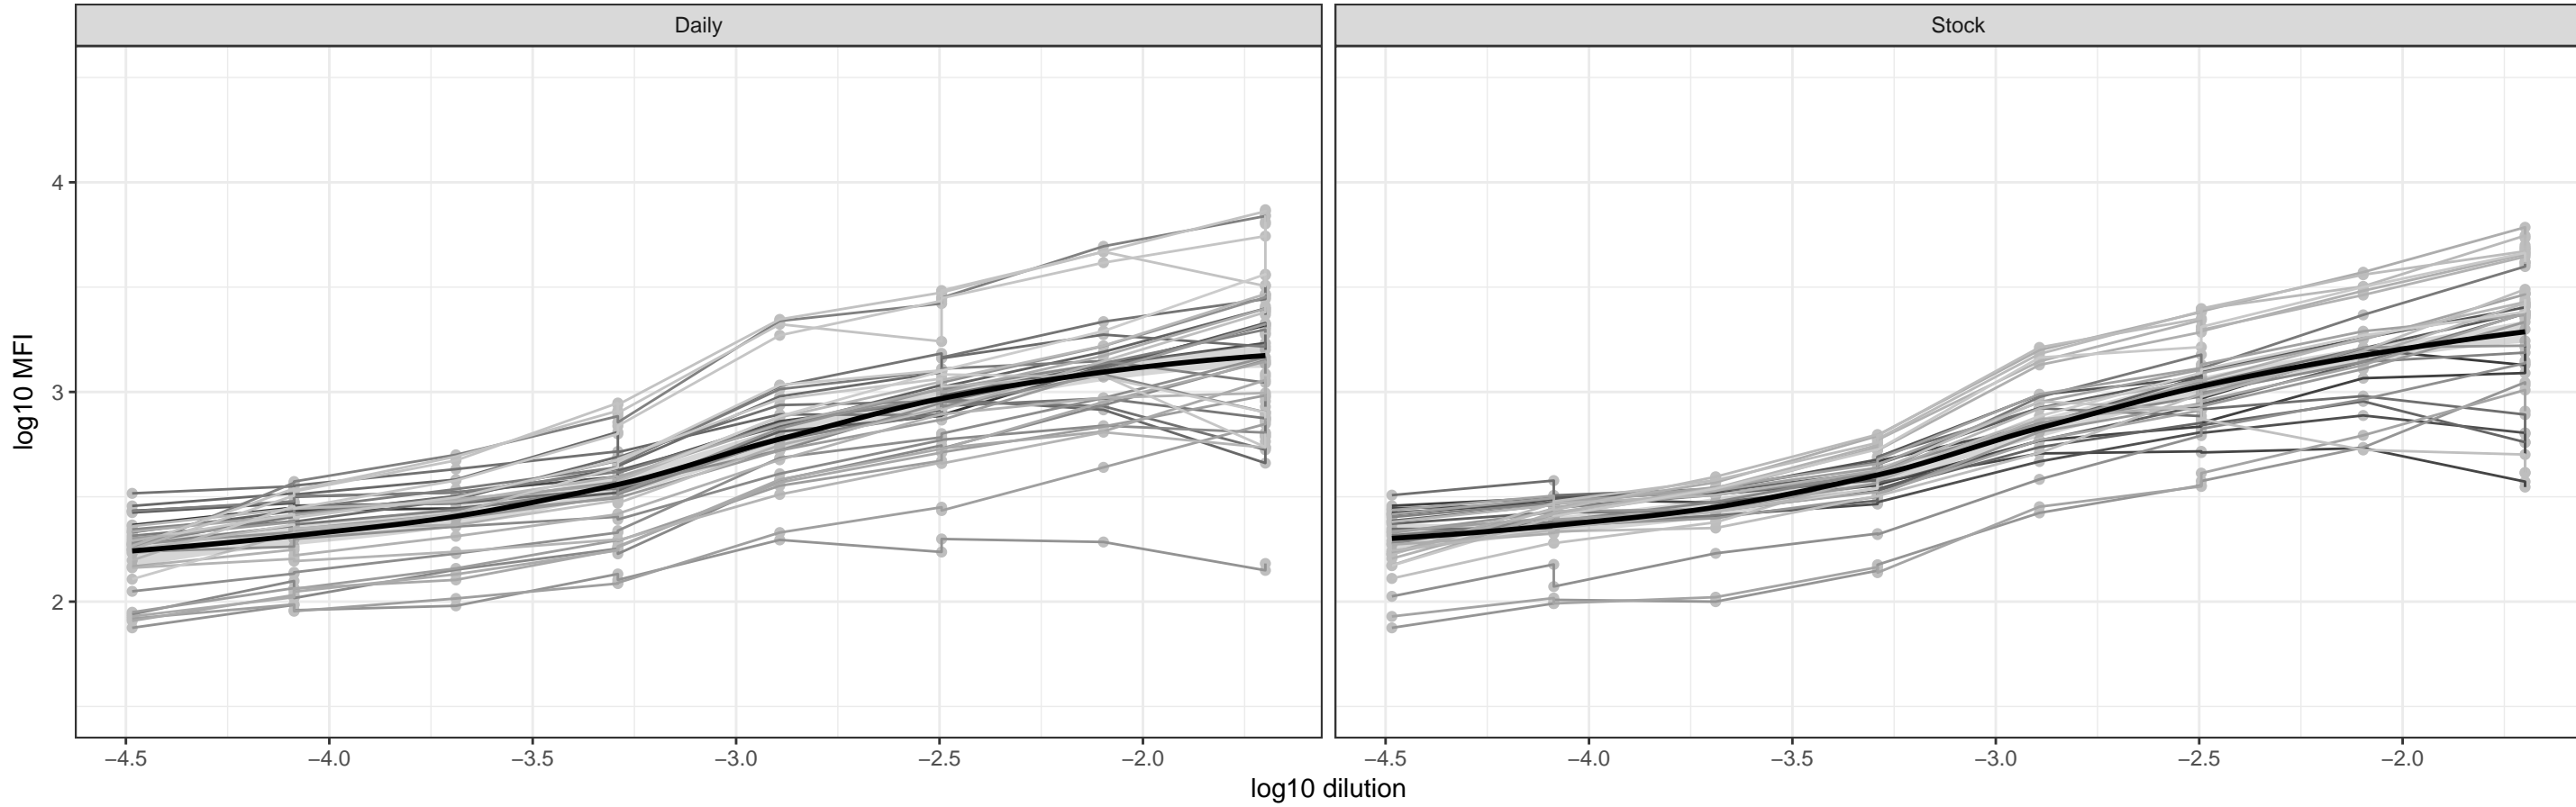

VAR2CSA:Wash

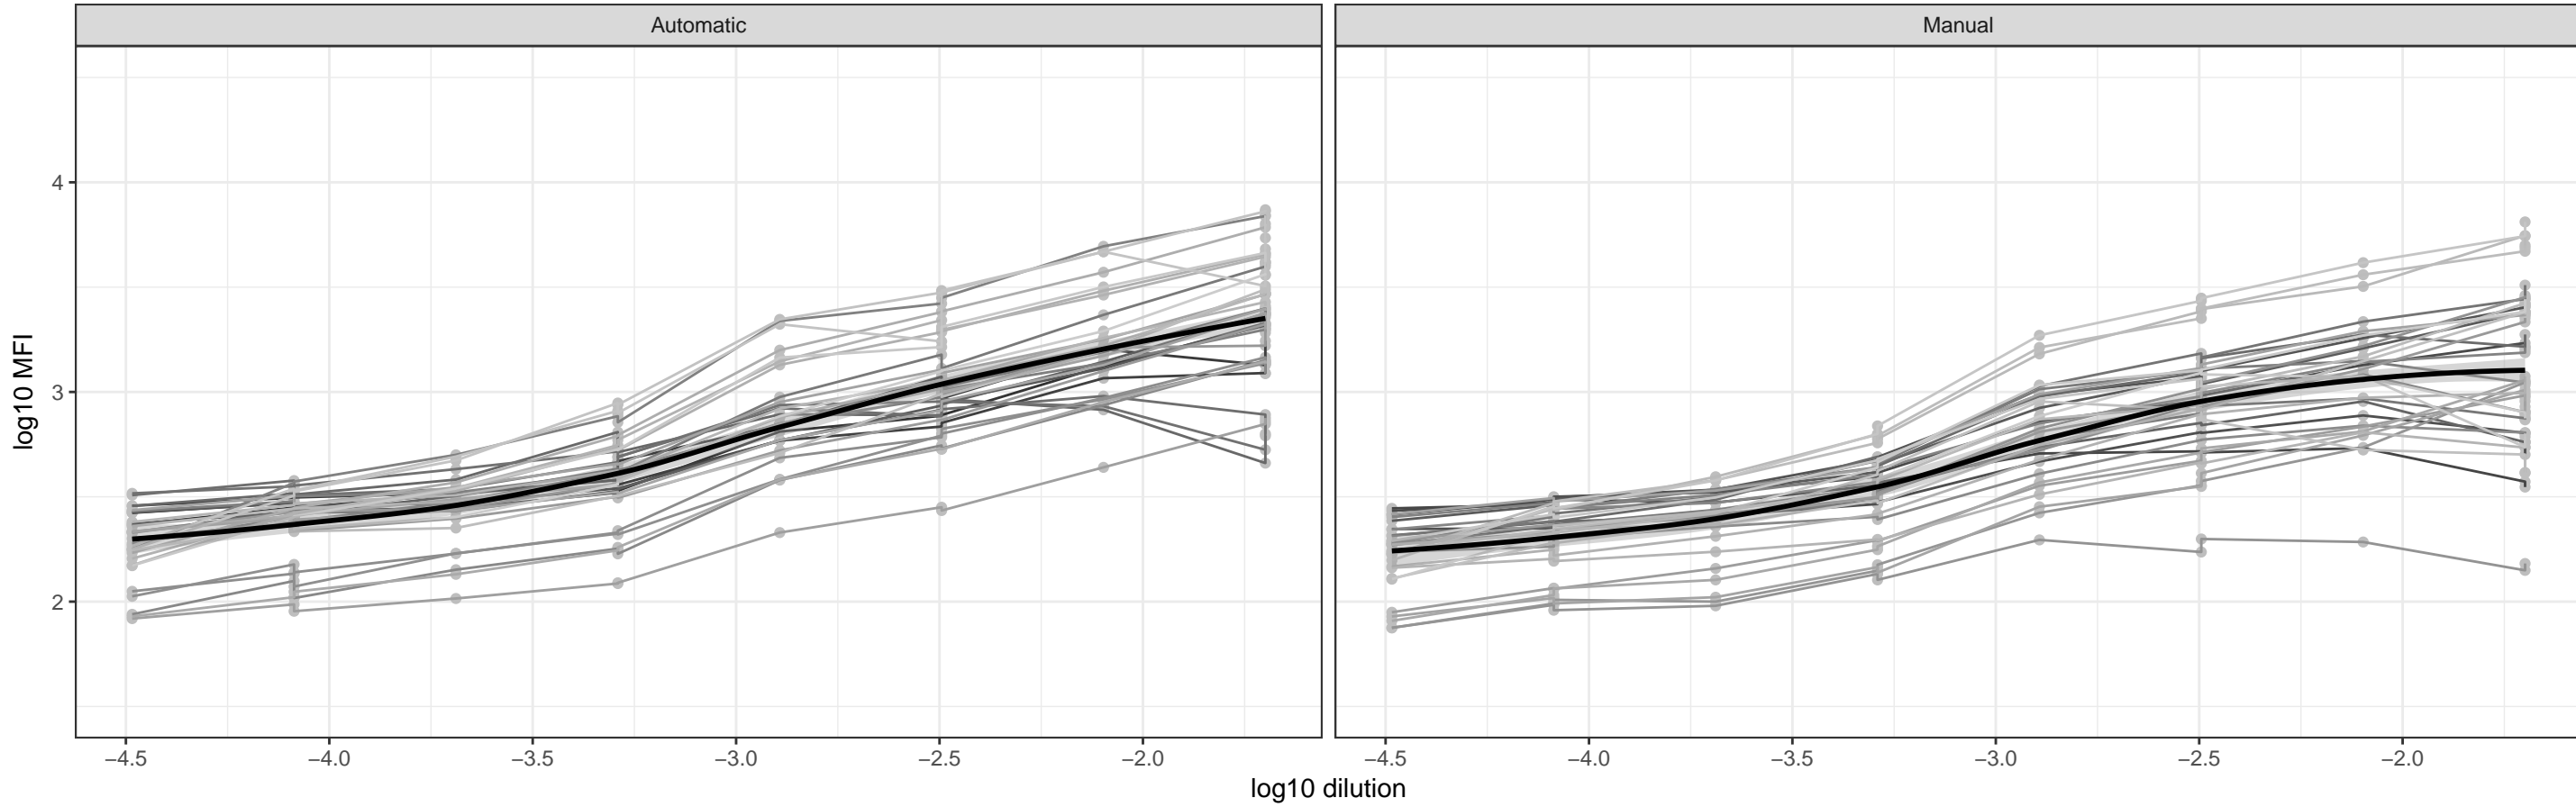

VAR2CSA:Operator

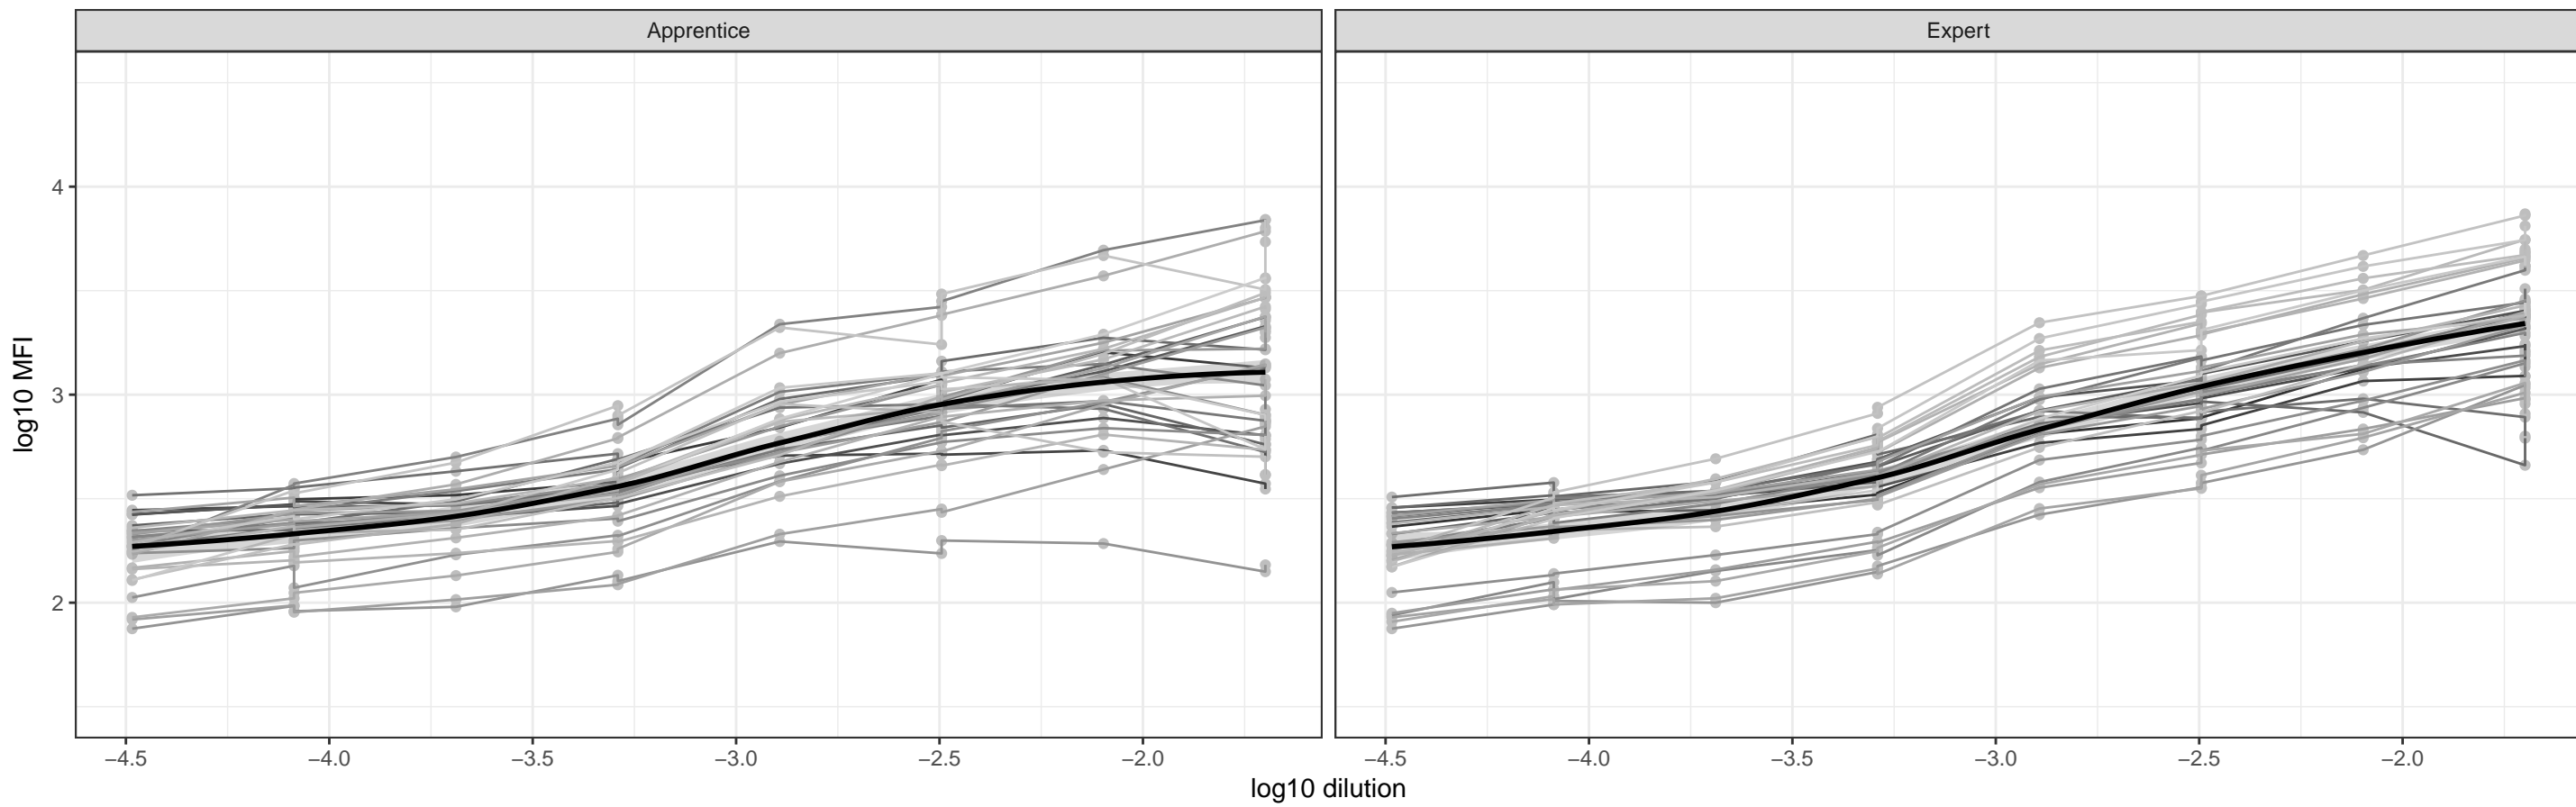

Supplement: Supplementary file 1 [file 1 › pone.0199278.s004.pdf]
