# Supplementary material
Source: publisher figshare collection journal article supplement (https://plos.figshare.com/articles/dataset/_/6731846)
Supplement: Supplementary file 1 [file 1]

Archive with 6 entries (6 files):
- pone.0199278.s001.xlsx
- pone.0199278.s002.xlsx
- pone.0199278.s003.pdf
- pone.0199278.s004.pdf
- pone.0199278.s005.pdf
- pone.0199278.s006.pdf
