# Supplementary material
Source: publisher figshare collection journal article supplement (https://plos.figshare.com/articles/dataset/_/6731846)
Supplement: Supplementary file 1 [file 1 › pone.0199278.s001.xlsx]

## Sheet: Hoja1
Plate	Temperature	Predilution	Bead	Wash	Operator
1	37	Stock	Several	Automatic	Apprentice
2	22	Stock	Several	Automatic	Apprentice
3	37	Daily	Several	Manual	Expert
4	37	Stock	Several	Manual	Expert
5	37	Daily	Stock	Automatic	Expert
6	37	Stock	Several	Automatic	Expert
7	22	Daily	Several	Automatic	Expert
8	37	Daily	Several	Manual	Apprentice
9	37	Daily	Several	Manual	Expert
10	37	Daily	Several	Manual	Expert
11	37	Daily	Several	Automatic	Expert
12	22	Daily	Several	Automatic	Apprentice
13	22	Stock	Several	Manual	Expert
14	22	Daily	Several	Automatic	Apprentice
15	22	Stock	Stock	Automatic	Apprentice
16	22	Daily	Stock	Automatic	Apprentice
17	37	Stock	Several	Manual	Expert
18	37	Stock	Stock	Manual	Apprentice
19	22	Stock	Stock	Automatic	Apprentice
20	22	Stock	Stock	Manual	Expert
21	37	Stock	Several	Automatic	Expert
22	37	Stock	Stock	Manual	Expert
23	37	Stock	Stock	Automatic	Expert
24	37	Stock	Stock	Automatic	Expert
25	37	Daily	Several	Automatic	Expert
26	22	Daily	Several	Automatic	Expert
27	22	Stock	Several	Manual	Apprentice
28	37	Daily	Stock	Manual	Expert
29	37	Daily	Several	Automatic	Expert
30	37	Stock	Stock	Automatic	Apprentice
31	37	Daily	Stock	Automatic	Expert
32	22	Stock	Several	Automatic	Expert
33	37	Stock	Stock	Manual	Apprentice
34	37	Stock	Stock	Automatic	Apprentice
35	22	Stock	Stock	Automatic	Apprentice
36	37	Daily	Several	Automatic	Apprentice
37	22	Daily	Stock	Automatic	Apprentice
38	22	Daily	Stock	Manual	Expert
39	37	Daily	Several	Automatic	Apprentice
40	37	Stock	Several	Manual	Expert
41	22	Stock	Several	Manual	Expert
42	22	Stock	Stock	Automatic	Apprentice
43	22	Stock	Several	Manual	Expert
44	22	Stock	Stock	Manual	Apprentice
45	22	Daily	Stock	Manual	Expert
46	37	Daily	Stock	Manual	Apprentice
47	37	Daily	Stock	Automatic	Apprentice
48	22	Stock	Several	Automatic	Expert
49	22	Daily	Several	Automatic	Apprentice
50	22	Daily	Several	Manual	Expert
51	22	Daily	Several	Manual	Apprentice
52	22	Daily	Several	Manual	Apprentice
53	22	Stock	Several	Automatic	Expert
54	22	Daily	Stock	Automatic	Expert
55	22	Daily	Several	Manual	Apprentice
56	37	Daily	Several	Manual	Apprentice
57	22	Daily	Stock	Manual	Apprentice
58	37	Stock	Several	Manual	Expert
59	37	Stock	Stock	Manual	Expert
60	22	Stock	Several	Manual	Apprentice
61	37	Daily	Stock	Automatic	Apprentice
62	37	Daily	Stock	Manual	Apprentice
63	22	Daily	Several	Manual	Apprentice
64	22	Daily	Stock	Manual	Apprentice
