# Supplementary material
Source: publisher figshare collection journal article supplement (https://plos.figshare.com/articles/dataset/_/6731846)
Supplement: Supplementary file 1 [file 1 › pone.0199278.s002.xlsx]

## Sheet: legend
Variables	Definition
plate	Number of plate analyzed [1-64]
type	Type of analysis: multiplex (mp) or singleplex (sp)
antigen	The antigen analysed
Sample Type	The type of sample analyzed: Blank, Positive (positive controls), Standard (singleplex) or Subject
Sample Dil	Number of dilution for each sample type
well	The well on the plate
dilution	Dilution factor
Bead	Coupling of Bead [Stock vs. Several]
Predilution	Sample predilution [Stock vs. Daily]
Temperature	Temperature of incubation [22ºC vs. 37ºC]
Wash	Type of washing [Manual vs. Automatic]
Condition	All conditions together
mfi	Median Fluorescence Intensity
log10_mfi	log10(MFI)

## Sheet: data.txt
plate	type	antigen	Sample Type	Sample Dil	well	dilution	Bead	Predilution	Temperature	Wash	Condition	mfi	log10_mfi
1	sp	Anti-human IgG	standard	1	A1	0.004	Stock	Daily	22	Automatic	22DSA	24746	4.39351
2	sp	Anti-human IgG	standard	1	A1	0.004	Stock	Stock	22	Automatic	22SSA	24138	4.3827
3	sp	Anti-human IgG	standard	1	A1	0.004	Stock	Stock	37	Automatic	37SSA	26678.5	4.42616
4	sp	Anti-human IgG	standard	1	A1	0.004	Stock	Stock	37	Manual	37SSM	30156	4.47937
5	sp	Anti-human IgG	standard	1	A1	0.004	Stock	Daily	37	Manual	37DSM	29856.5	4.47504
6	sp	Anti-human IgG	standard	1	A1	0.004	Stock	Stock	22	Manual	22SSM	26403.5	4.42166
7	sp	Anti-human IgG	standard	1	A1	0.004	Several	Stock	37	Manual	37SCM	30586.5	4.48553
8	sp	Anti-human IgG	standard	1	A1	0.004	Stock	Daily	22	Automatic	22DSA	29043.5	4.46305
9	sp	Anti-human IgG	standard	1	A1	0.004	Several	Stock	37	Manual	37SCM	29159	4.46477
10	sp	Anti-human IgG	standard	1	A1	0.004	Stock	Stock	22	Automatic	22SSA	29521	4.47013
11	sp	Anti-human IgG	standard	1	A1	0.004	Several	Daily	22	Automatic	22DCA	28857.5	4.46026
12	sp	Anti-human IgG	standard	1	A1	0.004	Several	Stock	22	Manual	22SCM	26244	4.41903
13	sp	Anti-human IgG	standard	1	A1	0.004	Several	Daily	37	Automatic	37DCA	26547	4.42402
14	sp	Anti-human IgG	standard	1	A1	0.004	Several	Daily	22	Manual	22DCM	29786.5	4.47402
15	sp	Anti-human IgG	standard	1	A1	0.004	Several	Stock	22	Automatic	22SCA	29190	4.46523
16	sp	Anti-human IgG	standard	1	A1	0.004	Stock	Daily	37	Automatic	37DSA	29673.5	4.47237
17	sp	Anti-human IgG	standard	1	A1	0.004	Several	Daily	37	Manual	37DCM	29076.5	4.46354
18	sp	Anti-human IgG	standard	1	A1	0.004	Several	Daily	22	Manual	22DCM	26132.5	4.41718
19	sp	Anti-human IgG	standard	1	A1	0.004	Several	Stock	22	Automatic	22SCA	24859	4.39548
20	sp	Anti-human IgG	standard	1	A1	0.004	Several	Daily	37	Manual	37DCM	27623.5	4.44128
21	sp	Anti-human IgG	standard	1	A1	0.004	Stock	Daily	37	Automatic	37DSA	29200.5	4.46539
22	sp	Anti-human IgG	standard	1	A1	0.004	Several	Daily	37	Automatic	37DCA	24906	4.3963
23	sp	Anti-human IgG	standard	1	A1	0.004	Stock	Stock	37	Manual	37SSM	30231	4.48045
24	sp	Anti-human IgG	standard	1	A1	0.004	Stock	Daily	37	Manual	37DSM	30402.5	4.48291
25	sp	Anti-human IgG	standard	1	A1	0.004	Several	Daily	22	Automatic	22DCA	29357.5	4.46772
26	sp	Anti-human IgG	standard	1	A1	0.004	Stock	Daily	22	Manual	22DSM	24536.5	4.38981
27	sp	Anti-human IgG	standard	1	A1	0.004	Several	Daily	37	Automatic	37DCA	28663	4.45732
28	sp	Anti-human IgG	standard	1	A1	0.004	Several	Stock	37	Automatic	37SCA	29604.5	4.47136
29	sp	Anti-human IgG	standard	1	A1	0.004	Stock	Daily	22	Manual	22DSM	27299	4.43615
30	sp	Anti-human IgG	standard	1	A1	0.004	Several	Daily	22	Manual	22DCM	23333	4.36797
31	sp	Anti-human IgG	standard	1	A1	0.004	Several	Stock	22	Manual	22SCM	24234.5	4.38443
32	sp	Anti-human IgG	standard	1	A1	0.004	Stock	Stock	37	Automatic	37SSA	24715.5	4.39297
33	sp	Anti-human IgG	standard	1	A1	0.004	Stock	Stock	22	Manual	22SSM	26891	4.42961
34	sp	Anti-human IgG	standard	1	A1	0.004	Stock	Daily	22	Automatic	22DSA	24409	4.38755
35	sp	Anti-human IgG	standard	1	A1	0.004	Several	Daily	37	Manual	37DCM	24762	4.39379
36	sp	Anti-human IgG	standard	1	A1	0.004	Several	Daily	22	Automatic	22DCA	30715	4.48735
37	sp	Anti-human IgG	standard	1	A1	0.004	Stock	Stock	37	Manual	37SSM	32123.5	4.50682
38	sp	Anti-human IgG	standard	1	A1	0.004	Stock	Stock	37	Automatic	37SSA	31970.5	4.50475
39	sp	Anti-human IgG	standard	1	A1	0.004	Several	Stock	22	Manual	22SCM	32068.5	4.50608
40	sp	Anti-human IgG	standard	1	A1	0.004	Stock	Stock	22	Automatic	22SSA	30256	4.48081
41	sp	Anti-human IgG	standard	1	A1	0.004	Several	Daily	37	Manual	37DCM	32547	4.51251
42	sp	Anti-human IgG	standard	1	A1	0.004	Several	Daily	22	Automatic	22DCA	29665	4.47224
43	sp	Anti-human IgG	standard	1	A1	0.004	Stock	Daily	37	Automatic	37DSA	30538.5	4.48485
44	sp	Anti-human IgG	standard	1	A1	0.004	Several	Stock	22	Automatic	22SCA	30518.5	4.48456
45	sp	Anti-human IgG	standard	1	A1	0.004	Several	Stock	22	Automatic	22SCA	32275.5	4.50887
46	sp	Anti-human IgG	standard	1	A1	0.004	Stock	Daily	37	Manual	37DSM	30096	4.47851
47	sp	Anti-human IgG	standard	1	A1	0.004	Several	Stock	37	Automatic	37SCA	30960.5	4.49081
48	sp	Anti-human IgG	standard	1	A1	0.004	Stock	Daily	22	Manual	22DSM	28567.5	4.45587
49	sp	Anti-human IgG	standard	1	A1	0.004	Stock	Stock	37	Automatic	37SSA	28973	4.46199
50	sp	Anti-human IgG	standard	1	A1	0.004	Stock	Daily	37	Automatic	37DSA	29941.5	4.47627
51	sp	Anti-human IgG	standard	1	A1	0.004	Several	Stock	37	Manual	37SCM	27917	4.44587
52	sp	Anti-human IgG	standard	1	A1	0.004	Stock	Stock	37	Manual	37SSM	31112.5	4.49293
53	sp	Anti-human IgG	standard	1	A1	0.004	Several	Stock	37	Manual	37SCM	28997	4.46235
54	sp	Anti-human IgG	standard	1	A1	0.004	Stock	Stock	22	Automatic	22SSA	27763.5	4.44347
55	sp	Anti-human IgG	standard	1	A1	0.004	Stock	Daily	22	Manual	22DSM	26717	4.42679
56	sp	Anti-human IgG	standard	1	A1	0.004	Several	Stock	22	Manual	22SCM	25849	4.41244
57	sp	Anti-human IgG	standard	1	A1	0.004	Several	Daily	37	Automatic	37DCA	29284	4.46663
58	sp	Anti-human IgG	standard	1	A1	0.004	Several	Daily	37	Automatic	37DCA	25975.5	4.41456
59	sp	Anti-human IgG	standard	1	A1	0.004	Several	Daily	22	Manual	22DCM	28010	4.44731
60	sp	Anti-human IgG	standard	1	A1	0.004	Several	Daily	37	Manual	37DCM	27479	4.439
61	sp	Anti-human IgG	standard	1	A1	0.004	Several	Stock	37	Automatic	37SCA	27359.5	4.43711
62	sp	Anti-human IgG	standard	1	A1	0.004	Several	Daily	22	Manual	22DCM	27019	4.43167
63	sp	Anti-human IgG	standard	1	A1	0.004	Several	Stock	22	Manual	22SCM	26300	4.41996
64	sp	Anti-human IgG	standard	1	A1	0.004	Several	Daily	22	Automatic	22DCA	26669.5	4.42601
1	sp	Anti-human IgG	standard	13	A10	2.38e-07	Stock	Daily	22	Automatic	22DSA	2357.5	3.37245
2	sp	Anti-human IgG	standard	13	A10	2.38e-07	Stock	Stock	22	Automatic	22SSA	919	2.96332
3	sp	Anti-human IgG	standard	13	A10	2.38e-07	Stock	Stock	37	Automatic	37SSA	2680.5	3.42822
4	sp	Anti-human IgG	standard	13	A10	2.38e-07	Stock	Stock	37	Manual	37SSM	1561.5	3.19354
5	sp	Anti-human IgG	standard	13	A10	2.38e-07	Stock	Daily	37	Manual	37DSM	3504	3.54456
6	sp	Anti-human IgG	standard	13	A10	2.38e-07	Stock	Stock	22	Manual	22SSM	855	2.93197
7	sp	Anti-human IgG	standard	13	A10	2.38e-07	Several	Stock	37	Manual	37SCM	1442	3.15897
8	sp	Anti-human IgG	standard	13	A10	2.38e-07	Stock	Daily	22	Automatic	22DSA	2437	3.38686
9	sp	Anti-human IgG	standard	13	A10	2.38e-07	Several	Stock	37	Manual	37SCM	1373	3.13767
10	sp	Anti-human IgG	standard	13	A10	2.38e-07	Stock	Stock	22	Automatic	22SSA	2404.5	3.38102
11	sp	Anti-human IgG	standard	13	A10	2.38e-07	Several	Daily	22	Automatic	22DCA	1453.5	3.16242
12	sp	Anti-human IgG	standard	13	A10	2.38e-07	Several	Stock	22	Manual	22SCM	2192.5	3.34094
13	sp	Anti-human IgG	standard	13	A10	2.38e-07	Several	Daily	37	Automatic	37DCA	1397.5	3.14535
14	sp	Anti-human IgG	standard	13	A10	2.38e-07	Several	Daily	22	Manual	22DCM	1270	3.1038
15	sp	Anti-human IgG	standard	13	A10	2.38e-07	Several	Stock	22	Automatic	22SCA	1478.5	3.16982
16	sp	Anti-human IgG	standard	13	A10	2.38e-07	Stock	Daily	37	Automatic	37DSA	2018	3.30492
17	sp	Anti-human IgG	standard	13	A10	2.38e-07	Several	Daily	37	Manual	37DCM	1358	3.1329
18	sp	Anti-human IgG	standard	13	A10	2.38e-07	Several	Daily	22	Manual	22DCM	4091.5	3.61188
19	sp	Anti-human IgG	standard	13	A10	2.38e-07	Several	Stock	22	Automatic	22SCA	1028.5	3.0122
20	sp	Anti-human IgG	standard	13	A10	2.38e-07	Several	Daily	37	Manual	37DCM	1745	3.2418
21	sp	Anti-human IgG	standard	13	A10	2.38e-07	Stock	Daily	37	Automatic	37DSA	1626	3.21112
22	sp	Anti-human IgG	standard	13	A10	2.38e-07	Several	Daily	37	Automatic	37DCA	1623	3.21032
23	sp	Anti-human IgG	standard	13	A10	2.38e-07	Stock	Stock	37	Manual	37SSM	1544	3.18865
24	sp	Anti-human IgG	standard	13	A10	2.38e-07	Stock	Daily	37	Manual	37DSM	2015.5	3.30438
25	sp	Anti-human IgG	standard	13	A10	2.38e-07	Several	Daily	22	Automatic	22DCA	1262	3.10106
26	sp	Anti-human IgG	standard	13	A10	2.38e-07	Stock	Daily	22	Manual	22DSM	493	2.69285
27	sp	Anti-human IgG	standard	13	A10	2.38e-07	Several	Daily	37	Automatic	37DCA	1443	3.15927
28	sp	Anti-human IgG	standard	13	A10	2.38e-07	Several	Stock	37	Automatic	37SCA	1641	3.21511
29	sp	Anti-human IgG	standard	13	A10	2.38e-07	Stock	Daily	22	Manual	22DSM	833	2.92065
30	sp	Anti-human IgG	standard	13	A10	2.38e-07	Several	Daily	22	Manual	22DCM	946	2.97589
31	sp	Anti-human IgG	standard	13	A10	2.38e-07	Several	Stock	22	Manual	22SCM	2220.5	3.34645
32	sp	Anti-human IgG	standard	13	A10	2.38e-07	Stock	Stock	37	Automatic	37SSA	1152.5	3.06164
33	sp	Anti-human IgG	standard	13	A10	2.38e-07	Stock	Stock	22	Manual	22SSM	3051	3.48444
34	sp	Anti-human IgG	standard	13	A10	2.38e-07	Stock	Daily	22	Automatic	22DSA	4789.5	3.68029
35	sp	Anti-human IgG	standard	13	A10	2.38e-07	Several	Daily	37	Manual	37DCM	5971.5	3.77608
36	sp	Anti-human IgG	standard	13	A10	2.38e-07	Several	Daily	22	Automatic	22DCA	4394.5	3.64291
37	sp	Anti-human IgG	standard	13	A10	2.38e-07	Stock	Stock	37	Manual	37SSM	1213	3.08386
38	sp	Anti-human IgG	standard	13	A10	2.38e-07	Stock	Stock	37	Automatic	37SSA	1416.5	3.15122
39	sp	Anti-human IgG	standard	13	A10	2.38e-07	Several	Stock	22	Manual	22SCM	1294	3.11193
40	sp	Anti-human IgG	standard	13	A10	2.38e-07	Stock	Stock	22	Automatic	22SSA	827	2.91751
41	sp	Anti-human IgG	standard	13	A10	2.38e-07	Several	Daily	37	Manual	37DCM	2764	3.44154
42	sp	Anti-human IgG	standard	13	A10	2.38e-07	Several	Daily	22	Automatic	22DCA	3134.5	3.49617
43	sp	Anti-human IgG	standard	13	A10	2.38e-07	Stock	Daily	37	Automatic	37DSA	1125	3.05115
44	sp	Anti-human IgG	standard	13	A10	2.38e-07	Several	Stock	22	Automatic	22SCA	880.5	2.94473
45	sp	Anti-human IgG	standard	13	A10	2.38e-07	Several	Stock	22	Automatic	22SCA	746.5	2.87303
46	sp	Anti-human IgG	standard	13	A10	2.38e-07	Stock	Daily	37	Manual	37DSM	881.5	2.94522
47	sp	Anti-human IgG	standard	13	A10	2.38e-07	Several	Stock	37	Automatic	37SCA	882.5	2.94571
48	sp	Anti-human IgG	standard	13	A10	2.38e-07	Stock	Daily	22	Manual	22DSM	698	2.84386
49	sp	Anti-human IgG	standard	13	A10	2.38e-07	Stock	Stock	37	Automatic	37SSA	1236.5	3.09219
50	sp	Anti-human IgG	standard	13	A10	2.38e-07	Stock	Daily	37	Automatic	37DSA	1339	3.12678
51	sp	Anti-human IgG	standard	13	A10	2.38e-07	Several	Stock	37	Manual	37SCM	911.5	2.95976
52	sp	Anti-human IgG	standard	13	A10	2.38e-07	Stock	Stock	37	Manual	37SSM	1160.5	3.06465
53	sp	Anti-human IgG	standard	13	A10	2.38e-07	Several	Stock	37	Manual	37SCM	979.5	2.991
54	sp	Anti-human IgG	standard	13	A10	2.38e-07	Stock	Stock	22	Automatic	22SSA	1144.5	3.05862
55	sp	Anti-human IgG	standard	13	A10	2.38e-07	Stock	Daily	22	Manual	22DSM	674.5	2.82898
56	sp	Anti-human IgG	standard	13	A10	2.38e-07	Several	Stock	22	Manual	22SCM	589.5	2.77048
57	sp	Anti-human IgG	standard	13	A10	2.38e-07	Several	Daily	37	Automatic	37DCA	1108.5	3.04474
58	sp	Anti-human IgG	standard	13	A10	2.38e-07	Several	Daily	37	Automatic	37DCA	2262	3.35449
59	sp	Anti-human IgG	standard	13	A10	2.38e-07	Several	Daily	22	Manual	22DCM	822	2.91487
60	sp	Anti-human IgG	standard	13	A10	2.38e-07	Several	Daily	37	Manual	37DCM	1423.5	3.15336
61	sp	Anti-human IgG	standard	13	A10	2.38e-07	Several	Stock	37	Automatic	37SCA	967.5	2.98565
62	sp	Anti-human IgG	standard	13	A10	2.38e-07	Several	Daily	22	Manual	22DCM	753.5	2.87708
63	sp	Anti-human IgG	standard	13	A10	2.38e-07	Several	Stock	22	Manual	22SCM	843	2.92583
64	sp	Anti-human IgG	standard	13	A10	2.38e-07	Several	Daily	22	Automatic	22DCA	1065.5	3.02755
1	sp	Anti-human IgG	standard	14	A11	1.06e-07	Stock	Daily	22	Automatic	22DSA	2434	3.38632
2	sp	Anti-human IgG	standard	14	A11	1.06e-07	Stock	Stock	22	Automatic	22SSA	874.5	2.94176
3	sp	Anti-human IgG	standard	14	A11	1.06e-07	Stock	Stock	37	Automatic	37SSA	2745.5	3.43862
4	sp	Anti-human IgG	standard	14	A11	1.06e-07	Stock	Stock	37	Manual	37SSM	1573	3.19673
5	sp	Anti-human IgG	standard	14	A11	1.06e-07	Stock	Daily	37	Manual	37DSM	3650	3.56229
6	sp	Anti-human IgG	standard	14	A11	1.06e-07	Stock	Stock	22	Manual	22SSM	866.5	2.93777
7	sp	Anti-human IgG	standard	14	A11	1.06e-07	Several	Stock	37	Manual	37SCM	1266.5	3.10261
8	sp	Anti-human IgG	standard	14	A11	1.06e-07	Stock	Daily	22	Automatic	22DSA	1979	3.29645
9	sp	Anti-human IgG	standard	14	A11	1.06e-07	Several	Stock	37	Manual	37SCM	1254.5	3.09847
10	sp	Anti-human IgG	standard	14	A11	1.06e-07	Stock	Stock	22	Automatic	22SSA	2360	3.37291
11	sp	Anti-human IgG	standard	14	A11	1.06e-07	Several	Daily	22	Automatic	22DCA	1005	3.00217
12	sp	Anti-human IgG	standard	14	A11	1.06e-07	Several	Stock	22	Manual	22SCM	2012	3.30363
13	sp	Anti-human IgG	standard	14	A11	1.06e-07	Several	Daily	37	Automatic	37DCA	1314	3.1186
14	sp	Anti-human IgG	standard	14	A11	1.06e-07	Several	Daily	22	Manual	22DCM	1207.5	3.08189
15	sp	Anti-human IgG	standard	14	A11	1.06e-07	Several	Stock	22	Automatic	22SCA	1510.5	3.17912
16	sp	Anti-human IgG	standard	14	A11	1.06e-07	Stock	Daily	37	Automatic	37DSA	3334	3.52297
17	sp	Anti-human IgG	standard	14	A11	1.06e-07	Several	Daily	37	Manual	37DCM	1186	3.07408
18	sp	Anti-human IgG	standard	14	A11	1.06e-07	Several	Daily	22	Manual	22DCM	1930	3.28556
19	sp	Anti-human IgG	standard	14	A11	1.06e-07	Several	Stock	22	Automatic	22SCA	881.5	2.94522
20	sp	Anti-human IgG	standard	14	A11	1.06e-07	Several	Daily	37	Manual	37DCM	1445.5	3.16002
21	sp	Anti-human IgG	standard	14	A11	1.06e-07	Stock	Daily	37	Automatic	37DSA	1486.5	3.17216
22	sp	Anti-human IgG	standard	14	A11	1.06e-07	Several	Daily	37	Automatic	37DCA	1568.5	3.19548
23	sp	Anti-human IgG	standard	14	A11	1.06e-07	Stock	Stock	37	Manual	37SSM	1349	3.13001
24	sp	Anti-human IgG	standard	14	A11	1.06e-07	Stock	Daily	37	Manual	37DSM	1414.5	3.1506
25	sp	Anti-human IgG	standard	14	A11	1.06e-07	Several	Daily	22	Automatic	22DCA	1078.5	3.03282
26	sp	Anti-human IgG	standard	14	A11	1.06e-07	Stock	Daily	22	Manual	22DSM	447	2.65031
27	sp	Anti-human IgG	standard	14	A11	1.06e-07	Several	Daily	37	Automatic	37DCA	1248.5	3.09639
28	sp	Anti-human IgG	standard	14	A11	1.06e-07	Several	Stock	37	Automatic	37SCA	1625.5	3.21099
29	sp	Anti-human IgG	standard	14	A11	1.06e-07	Stock	Daily	22	Manual	22DSM	686.5	2.83664
30	sp	Anti-human IgG	standard	14	A11	1.06e-07	Several	Daily	22	Manual	22DCM	919	2.96332
31	sp	Anti-human IgG	standard	14	A11	1.06e-07	Several	Stock	22	Manual	22SCM	907	2.95761
32	sp	Anti-human IgG	standard	14	A11	1.06e-07	Stock	Stock	37	Automatic	37SSA	990.5	2.99585
33	sp	Anti-human IgG	standard	14	A11	1.06e-07	Stock	Stock	22	Manual	22SSM	3249.5	3.51182
34	sp	Anti-human IgG	standard	14	A11	1.06e-07	Stock	Daily	22	Automatic	22DSA	4798	3.68106
35	sp	Anti-human IgG	standard	14	A11	1.06e-07	Several	Daily	37	Manual	37DCM	5512.5	3.74135
36	sp	Anti-human IgG	standard	14	A11	1.06e-07	Several	Daily	22	Automatic	22DCA	4488.5	3.6521
37	sp	Anti-human IgG	standard	14	A11	1.06e-07	Stock	Stock	37	Manual	37SSM	1146	3.05918
38	sp	Anti-human IgG	standard	14	A11	1.06e-07	Stock	Stock	37	Automatic	37SSA	1187	3.07445
39	sp	Anti-human IgG	standard	14	A11	1.06e-07	Several	Stock	22	Manual	22SCM	1082.5	3.03443
40	sp	Anti-human IgG	standard	14	A11	1.06e-07	Stock	Stock	22	Automatic	22SSA	721.5	2.85824
41	sp	Anti-human IgG	standard	14	A11	1.06e-07	Several	Daily	37	Manual	37DCM	1676	3.22427
42	sp	Anti-human IgG	standard	14	A11	1.06e-07	Several	Daily	22	Automatic	22DCA	2742.5	3.43815
43	sp	Anti-human IgG	standard	14	A11	1.06e-07	Stock	Daily	37	Automatic	37DSA	942	2.97405
44	sp	Anti-human IgG	standard	14	A11	1.06e-07	Several	Stock	22	Automatic	22SCA	766.5	2.88451
45	sp	Anti-human IgG	standard	14	A11	1.06e-07	Several	Stock	22	Automatic	22SCA	699.5	2.84479
46	sp	Anti-human IgG	standard	14	A11	1.06e-07	Stock	Daily	37	Manual	37DSM	758	2.87967
47	sp	Anti-human IgG	standard	14	A11	1.06e-07	Several	Stock	37	Automatic	37SCA	781	2.89265
48	sp	Anti-human IgG	standard	14	A11	1.06e-07	Stock	Daily	22	Manual	22DSM	823	2.9154
49	sp	Anti-human IgG	standard	14	A11	1.06e-07	Stock	Stock	37	Automatic	37SSA	1010	3.00432
50	sp	Anti-human IgG	standard	14	A11	1.06e-07	Stock	Daily	37	Automatic	37DSA	986.5	2.9941
51	sp	Anti-human IgG	standard	14	A11	1.06e-07	Several	Stock	37	Manual	37SCM	803.5	2.90499
52	sp	Anti-human IgG	standard	14	A11	1.06e-07	Stock	Stock	37	Manual	37SSM	937	2.97174
53	sp	Anti-human IgG	standard	14	A11	1.06e-07	Several	Stock	37	Manual	37SCM	874	2.94151
54	sp	Anti-human IgG	standard	14	A11	1.06e-07	Stock	Stock	22	Automatic	22SSA	1340.5	3.12727
55	sp	Anti-human IgG	standard	14	A11	1.06e-07	Stock	Daily	22	Manual	22DSM	597	2.77597
56	sp	Anti-human IgG	standard	14	A11	1.06e-07	Several	Stock	22	Manual	22SCM	592	2.77232
57	sp	Anti-human IgG	standard	14	A11	1.06e-07	Several	Daily	37	Automatic	37DCA	1049.5	3.02098
58	sp	Anti-human IgG	standard	14	A11	1.06e-07	Several	Daily	37	Automatic	37DCA	1013	3.00561
59	sp	Anti-human IgG	standard	14	A11	1.06e-07	Several	Daily	22	Manual	22DCM	763	2.88252
60	sp	Anti-human IgG	standard	14	A11	1.06e-07	Several	Daily	37	Manual	37DCM	1517	3.18099
61	sp	Anti-human IgG	standard	14	A11	1.06e-07	Several	Stock	37	Automatic	37SCA	836	2.92221
62	sp	Anti-human IgG	standard	14	A11	1.06e-07	Several	Daily	22	Manual	22DCM	982	2.99211
63	sp	Anti-human IgG	standard	14	A11	1.06e-07	Several	Stock	22	Manual	22SCM	801.5	2.9039
64	sp	Anti-human IgG	standard	14	A11	1.06e-07	Several	Daily	22	Automatic	22DCA	961.5	2.98295
1	sp	Anti-human IgG	standard	15	A12	4.69e-08	Stock	Daily	22	Automatic	22DSA	2707.5	3.43257
2	sp	Anti-human IgG	standard	15	A12	4.69e-08	Stock	Stock	22	Automatic	22SSA	902.5	2.95545
3	sp	Anti-human IgG	standard	15	A12	4.69e-08	Stock	Stock	37	Automatic	37SSA	2787	3.44514
4	sp	Anti-human IgG	standard	15	A12	4.69e-08	Stock	Stock	37	Manual	37SSM	1533	3.18554
5	sp	Anti-human IgG	standard	15	A12	4.69e-08	Stock	Daily	37	Manual	37DSM	3652.5	3.56259
6	sp	Anti-human IgG	standard	15	A12	4.69e-08	Stock	Stock	22	Manual	22SSM	821.5	2.91461
7	sp	Anti-human IgG	standard	15	A12	4.69e-08	Several	Stock	37	Manual	37SCM	1238.5	3.0929
8	sp	Anti-human IgG	standard	15	A12	4.69e-08	Stock	Daily	22	Automatic	22DSA	2037	3.30899
9	sp	Anti-human IgG	standard	15	A12	4.69e-08	Several	Stock	37	Manual	37SCM	1228	3.0892
10	sp	Anti-human IgG	standard	15	A12	4.69e-08	Stock	Stock	22	Automatic	22SSA	2061	3.31408
11	sp	Anti-human IgG	standard	15	A12	4.69e-08	Several	Daily	22	Automatic	22DCA	955.5	2.98023
12	sp	Anti-human IgG	standard	15	A12	4.69e-08	Several	Stock	22	Manual	22SCM	2147.5	3.33193
13	sp	Anti-human IgG	standard	15	A12	4.69e-08	Several	Daily	37	Automatic	37DCA	1437.5	3.15761
14	sp	Anti-human IgG	standard	15	A12	4.69e-08	Several	Daily	22	Manual	22DCM	1255	3.09864
15	sp	Anti-human IgG	standard	15	A12	4.69e-08	Several	Stock	22	Automatic	22SCA	1377.5	3.13909
16	sp	Anti-human IgG	standard	15	A12	4.69e-08	Stock	Daily	37	Automatic	37DSA	1888	3.276
17	sp	Anti-human IgG	standard	15	A12	4.69e-08	Several	Daily	37	Manual	37DCM	1039.5	3.01682
18	sp	Anti-human IgG	standard	15	A12	4.69e-08	Several	Daily	22	Manual	22DCM	1933.5	3.28634
19	sp	Anti-human IgG	standard	15	A12	4.69e-08	Several	Stock	22	Automatic	22SCA	921	2.96426
20	sp	Anti-human IgG	standard	15	A12	4.69e-08	Several	Daily	37	Manual	37DCM	1732.5	3.23867
21	sp	Anti-human IgG	standard	15	A12	4.69e-08	Stock	Daily	37	Automatic	37DSA	1364	3.13481
22	sp	Anti-human IgG	standard	15	A12	4.69e-08	Several	Daily	37	Automatic	37DCA	2468.5	3.39243
23	sp	Anti-human IgG	standard	15	A12	4.69e-08	Stock	Stock	37	Manual	37SSM	1373	3.13767
24	sp	Anti-human IgG	standard	15	A12	4.69e-08	Stock	Daily	37	Manual	37DSM	1440.5	3.15851
25	sp	Anti-human IgG	standard	15	A12	4.69e-08	Several	Daily	22	Automatic	22DCA	1028.5	3.0122
26	sp	Anti-human IgG	standard	15	A12	4.69e-08	Stock	Daily	22	Manual	22DSM	699	2.84448
27	sp	Anti-human IgG	standard	15	A12	4.69e-08	Several	Daily	37	Automatic	37DCA	1180.5	3.07207
28	sp	Anti-human IgG	standard	15	A12	4.69e-08	Several	Stock	37	Automatic	37SCA	1671.5	3.22311
29	sp	Anti-human IgG	standard	15	A12	4.69e-08	Stock	Daily	22	Manual	22DSM	673.5	2.82834
30	sp	Anti-human IgG	standard	15	A12	4.69e-08	Several	Daily	22	Manual	22DCM	841.5	2.92505
31	sp	Anti-human IgG	standard	15	A12	4.69e-08	Several	Stock	22	Manual	22SCM	840.5	2.92454
32	sp	Anti-human IgG	standard	15	A12	4.69e-08	Stock	Stock	37	Automatic	37SSA	825	2.91645
33	sp	Anti-human IgG	standard	15	A12	4.69e-08	Stock	Stock	22	Manual	22SSM	3141	3.49707
34	sp	Anti-human IgG	standard	15	A12	4.69e-08	Stock	Daily	22	Automatic	22DSA	5005.5	3.69945
35	sp	Anti-human IgG	standard	15	A12	4.69e-08	Several	Daily	37	Manual	37DCM	5554.5	3.74464
36	sp	Anti-human IgG	standard	15	A12	4.69e-08	Several	Daily	22	Automatic	22DCA	4514.5	3.65461
37	sp	Anti-human IgG	standard	15	A12	4.69e-08	Stock	Stock	37	Manual	37SSM	1118	3.04844
38	sp	Anti-human IgG	standard	15	A12	4.69e-08	Stock	Stock	37	Automatic	37SSA	1126.5	3.05173
39	sp	Anti-human IgG	standard	15	A12	4.69e-08	Several	Stock	22	Manual	22SCM	1179.5	3.0717
40	sp	Anti-human IgG	standard	15	A12	4.69e-08	Stock	Stock	22	Automatic	22SSA	666	2.82347
41	sp	Anti-human IgG	standard	15	A12	4.69e-08	Several	Daily	37	Manual	37DCM	1431	3.15564
42	sp	Anti-human IgG	standard	15	A12	4.69e-08	Several	Daily	22	Automatic	22DCA	2661.5	3.42513
43	sp	Anti-human IgG	standard	15	A12	4.69e-08	Stock	Daily	37	Automatic	37DSA	802.5	2.90445
44	sp	Anti-human IgG	standard	15	A12	4.69e-08	Several	Stock	22	Automatic	22SCA	756	2.87852
45	sp	Anti-human IgG	standard	15	A12	4.69e-08	Several	Stock	22	Automatic	22SCA	634.5	2.80243
46	sp	Anti-human IgG	standard	15	A12	4.69e-08	Stock	Daily	37	Manual	37DSM	688.5	2.8379
47	sp	Anti-human IgG	standard	15	A12	4.69e-08	Several	Stock	37	Automatic	37SCA	838.5	2.9235
48	sp	Anti-human IgG	standard	15	A12	4.69e-08	Stock	Daily	22	Manual	22DSM	672	2.82737
49	sp	Anti-human IgG	standard	15	A12	4.69e-08	Stock	Stock	37	Automatic	37SSA	932.5	2.96965
50	sp	Anti-human IgG	standard	15	A12	4.69e-08	Stock	Daily	37	Automatic	37DSA	1088	3.03663
51	sp	Anti-human IgG	standard	15	A12	4.69e-08	Several	Stock	37	Manual	37SCM	823.5	2.91566
52	sp	Anti-human IgG	standard	15	A12	4.69e-08	Stock	Stock	37	Manual	37SSM	871.5	2.94027
53	sp	Anti-human IgG	standard	15	A12	4.69e-08	Several	Stock	37	Manual	37SCM	771	2.88705
54	sp	Anti-human IgG	standard	15	A12	4.69e-08	Stock	Stock	22	Automatic	22SSA	1479	3.16997
55	sp	Anti-human IgG	standard	15	A12	4.69e-08	Stock	Daily	22	Manual	22DSM	436.5	2.63998
56	sp	Anti-human IgG	standard	15	A12	4.69e-08	Several	Stock	22	Manual	22SCM	599.5	2.77779
57	sp	Anti-human IgG	standard	15	A12	4.69e-08	Several	Daily	37	Automatic	37DCA	937.5	2.97197
58	sp	Anti-human IgG	standard	15	A12	4.69e-08	Several	Daily	37	Automatic	37DCA	1005.5	3.00238
59	sp	Anti-human IgG	standard	15	A12	4.69e-08	Several	Daily	22	Manual	22DCM	732.5	2.86481
60	sp	Anti-human IgG	standard	15	A12	4.69e-08	Several	Daily	37	Manual	37DCM	1306	3.11594
61	sp	Anti-human IgG	standard	15	A12	4.69e-08	Several	Stock	37	Automatic	37SCA	775.5	2.88958
62	sp	Anti-human IgG	standard	15	A12	4.69e-08	Several	Daily	22	Manual	22DCM	641.5	2.8072
63	sp	Anti-human IgG	standard	15	A12	4.69e-08	Several	Stock	22	Manual	22SCM	689.5	2.83853
64	sp	Anti-human IgG	standard	15	A12	4.69e-08	Several	Daily	22	Automatic	22DCA	933	2.96988
1	sp	Anti-human IgG	standard	2	A2	0.00177778	Stock	Daily	22	Automatic	22DSA	24382.5	4.38708
2	sp	Anti-human IgG	standard	2	A2	0.00177778	Stock	Stock	22	Automatic	22SSA	23682.5	4.37443
3	sp	Anti-human IgG	standard	2	A2	0.00177778	Stock	Stock	37	Automatic	37SSA	26092.5	4.41652
4	sp	Anti-human IgG	standard	2	A2	0.00177778	Stock	Stock	37	Manual	37SSM	30636.5	4.48624
5	sp	Anti-human IgG	standard	2	A2	0.00177778	Stock	Daily	37	Manual	37DSM	29405	4.46842
6	sp	Anti-human IgG	standard	2	A2	0.00177778	Stock	Stock	22	Manual	22SSM	26275	4.41954
7	sp	Anti-human IgG	standard	2	A2	0.00177778	Several	Stock	37	Manual	37SCM	30519.5	4.48458
8	sp	Anti-human IgG	standard	2	A2	0.00177778	Stock	Daily	22	Automatic	22DSA	28650	4.45712
9	sp	Anti-human IgG	standard	2	A2	0.00177778	Several	Stock	37	Manual	37SCM	29052	4.46318
10	sp	Anti-human IgG	standard	2	A2	0.00177778	Stock	Stock	22	Automatic	22SSA	29784	4.47398
11	sp	Anti-human IgG	standard	2	A2	0.00177778	Several	Daily	22	Automatic	22DCA	29296	4.46681
12	sp	Anti-human IgG	standard	2	A2	0.00177778	Several	Stock	22	Manual	22SCM	25844.5	4.41237
13	sp	Anti-human IgG	standard	2	A2	0.00177778	Several	Daily	37	Automatic	37DCA	26964.5	4.43079
14	sp	Anti-human IgG	standard	2	A2	0.00177778	Several	Daily	22	Manual	22DCM	29387	4.46816
15	sp	Anti-human IgG	standard	2	A2	0.00177778	Several	Stock	22	Automatic	22SCA	28496.5	4.45479
16	sp	Anti-human IgG	standard	2	A2	0.00177778	Stock	Daily	37	Automatic	37DSA	29172.5	4.46497
17	sp	Anti-human IgG	standard	2	A2	0.00177778	Several	Daily	37	Manual	37DCM	29287	4.46667
18	sp	Anti-human IgG	standard	2	A2	0.00177778	Several	Daily	22	Manual	22DCM	26626.5	4.42531
19	sp	Anti-human IgG	standard	2	A2	0.00177778	Several	Stock	22	Automatic	22SCA	24368	4.38682
20	sp	Anti-human IgG	standard	2	A2	0.00177778	Several	Daily	37	Manual	37DCM	28126.5	4.44912
21	sp	Anti-human IgG	standard	2	A2	0.00177778	Stock	Daily	37	Automatic	37DSA	28623	4.45672
22	sp	Anti-human IgG	standard	2	A2	0.00177778	Several	Daily	37	Automatic	37DCA	24876	4.39578
23	sp	Anti-human IgG	standard	2	A2	0.00177778	Stock	Stock	37	Manual	37SSM	30554	4.48507
24	sp	Anti-human IgG	standard	2	A2	0.00177778	Stock	Daily	37	Manual	37DSM	30150	4.47929
25	sp	Anti-human IgG	standard	2	A2	0.00177778	Several	Daily	22	Automatic	22DCA	29054.5	4.46321
26	sp	Anti-human IgG	standard	2	A2	0.00177778	Stock	Daily	22	Manual	22DSM	23533	4.37168
27	sp	Anti-human IgG	standard	2	A2	0.00177778	Several	Daily	37	Automatic	37DCA	28973	4.46199
28	sp	Anti-human IgG	standard	2	A2	0.00177778	Several	Stock	37	Automatic	37SCA	29960	4.47654
29	sp	Anti-human IgG	standard	2	A2	0.00177778	Stock	Daily	22	Manual	22DSM	26669	4.42601
30	sp	Anti-human IgG	standard	2	A2	0.00177778	Several	Daily	22	Manual	22DCM	24515	4.38943
31	sp	Anti-human IgG	standard	2	A2	0.00177778	Several	Stock	22	Manual	22SCM	24585.5	4.39068
32	sp	Anti-human IgG	standard	2	A2	0.00177778	Stock	Stock	37	Automatic	37SSA	24061.5	4.38132
33	sp	Anti-human IgG	standard	2	A2	0.00177778	Stock	Stock	22	Manual	22SSM	26304.5	4.42003
34	sp	Anti-human IgG	standard	2	A2	0.00177778	Stock	Daily	22	Automatic	22DSA	24097	4.38196
35	sp	Anti-human IgG	standard	2	A2	0.00177778	Several	Daily	37	Manual	37DCM	24515	4.38943
36	sp	Anti-human IgG	standard	2	A2	0.00177778	Several	Daily	22	Automatic	22DCA	30175	4.47965
37	sp	Anti-human IgG	standard	2	A2	0.00177778	Stock	Stock	37	Manual	37SSM	32047.5	4.50579
38	sp	Anti-human IgG	standard	2	A2	0.00177778	Stock	Stock	37	Automatic	37SSA	31891	4.50367
39	sp	Anti-human IgG	standard	2	A2	0.00177778	Several	Stock	22	Manual	22SCM	31687	4.50088
40	sp	Anti-human IgG	standard	2	A2	0.00177778	Stock	Stock	22	Automatic	22SSA	29973.5	4.47674
41	sp	Anti-human IgG	standard	2	A2	0.00177778	Several	Daily	37	Manual	37DCM	32399	4.51053
42	sp	Anti-human IgG	standard	2	A2	0.00177778	Several	Daily	22	Automatic	22DCA	30597	4.48568
43	sp	Anti-human IgG	standard	2	A2	0.00177778	Stock	Daily	37	Automatic	37DSA	30779.5	4.48826
44	sp	Anti-human IgG	standard	2	A2	0.00177778	Several	Stock	22	Automatic	22SCA	30124.5	4.47892
45	sp	Anti-human IgG	standard	2	A2	0.00177778	Several	Stock	22	Automatic	22SCA	32171	4.50746
46	sp	Anti-human IgG	standard	2	A2	0.00177778	Stock	Daily	37	Manual	37DSM	30229	4.48042
47	sp	Anti-human IgG	standard	2	A2	0.00177778	Several	Stock	37	Automatic	37SCA	29819	4.47449
48	sp	Anti-human IgG	standard	2	A2	0.00177778	Stock	Daily	22	Manual	22DSM	28264.5	4.45124
49	sp	Anti-human IgG	standard	2	A2	0.00177778	Stock	Stock	37	Automatic	37SSA	28622.5	4.45671
50	sp	Anti-human IgG	standard	2	A2	0.00177778	Stock	Daily	37	Automatic	37DSA	29680.5	4.47247
51	sp	Anti-human IgG	standard	2	A2	0.00177778	Several	Stock	37	Manual	37SCM	28691.5	4.45775
52	sp	Anti-human IgG	standard	2	A2	0.00177778	Stock	Stock	37	Manual	37SSM	31489.5	4.49817
53	sp	Anti-human IgG	standard	2	A2	0.00177778	Several	Stock	37	Manual	37SCM	27984	4.44691
54	sp	Anti-human IgG	standard	2	A2	0.00177778	Stock	Stock	22	Automatic	22SSA	27366.5	4.43722
55	sp	Anti-human IgG	standard	2	A2	0.00177778	Stock	Daily	22	Manual	22DSM	26102.5	4.41668
56	sp	Anti-human IgG	standard	2	A2	0.00177778	Several	Stock	22	Manual	22SCM	26994	4.43127
57	sp	Anti-human IgG	standard	2	A2	0.00177778	Several	Daily	37	Automatic	37DCA	29411.5	4.46852
58	sp	Anti-human IgG	standard	2	A2	0.00177778	Several	Daily	37	Automatic	37DCA	26121	4.41699
59	sp	Anti-human IgG	standard	2	A2	0.00177778	Several	Daily	22	Manual	22DCM	27522.5	4.43969
60	sp	Anti-human IgG	standard	2	A2	0.00177778	Several	Daily	37	Manual	37DCM	27345	4.43688
61	sp	Anti-human IgG	standard	2	A2	0.00177778	Several	Stock	37	Automatic	37SCA	27250.5	4.43537
62	sp	Anti-human IgG	standard	2	A2	0.00177778	Several	Daily	22	Manual	22DCM	27255.5	4.43545
63	sp	Anti-human IgG	standard	2	A2	0.00177778	Several	Stock	22	Manual	22SCM	25511.5	4.40674
64	sp	Anti-human IgG	standard	2	A2	0.00177778	Several	Daily	22	Automatic	22DCA	26798	4.4281
1	sp	Anti-human IgG	standard	3	A3	0.000790123	Stock	Daily	22	Automatic	22DSA	24515	4.38943
2	sp	Anti-human IgG	standard	3	A3	0.000790123	Stock	Stock	22	Automatic	22SSA	24327.5	4.3861
3	sp	Anti-human IgG	standard	3	A3	0.000790123	Stock	Stock	37	Automatic	37SSA	26969	4.43086
4	sp	Anti-human IgG	standard	3	A3	0.000790123	Stock	Stock	37	Manual	37SSM	30265.5	4.48095
5	sp	Anti-human IgG	standard	3	A3	0.000790123	Stock	Daily	37	Manual	37DSM	29697.5	4.47272
6	sp	Anti-human IgG	standard	3	A3	0.000790123	Stock	Stock	22	Manual	22SSM	26176.5	4.41791
7	sp	Anti-human IgG	standard	3	A3	0.000790123	Several	Stock	37	Manual	37SCM	30450.5	4.48359
8	sp	Anti-human IgG	standard	3	A3	0.000790123	Stock	Daily	22	Automatic	22DSA	28661	4.45729
9	sp	Anti-human IgG	standard	3	A3	0.000790123	Several	Stock	37	Manual	37SCM	29402	4.46838
10	sp	Anti-human IgG	standard	3	A3	0.000790123	Stock	Stock	22	Automatic	22SSA	29347	4.46756
11	sp	Anti-human IgG	standard	3	A3	0.000790123	Several	Daily	22	Automatic	22DCA	28687	4.45769
12	sp	Anti-human IgG	standard	3	A3	0.000790123	Several	Stock	22	Manual	22SCM	26091.5	4.4165
13	sp	Anti-human IgG	standard	3	A3	0.000790123	Several	Daily	37	Automatic	37DCA	27585	4.44067
14	sp	Anti-human IgG	standard	3	A3	0.000790123	Several	Daily	22	Manual	22DCM	28873.5	4.4605
15	sp	Anti-human IgG	standard	3	A3	0.000790123	Several	Stock	22	Automatic	22SCA	28317	4.45205
16	sp	Anti-human IgG	standard	3	A3	0.000790123	Stock	Daily	37	Automatic	37DSA	29831	4.47467
17	sp	Anti-human IgG	standard	3	A3	0.000790123	Several	Daily	37	Manual	37DCM	29974.5	4.47675
18	sp	Anti-human IgG	standard	3	A3	0.000790123	Several	Daily	22	Manual	22DCM	26271.5	4.41948
19	sp	Anti-human IgG	standard	3	A3	0.000790123	Several	Stock	22	Automatic	22SCA	24763	4.3938
20	sp	Anti-human IgG	standard	3	A3	0.000790123	Several	Daily	37	Manual	37DCM	28121.5	4.44904
21	sp	Anti-human IgG	standard	3	A3	0.000790123	Stock	Daily	37	Automatic	37DSA	27934.5	4.44614
22	sp	Anti-human IgG	standard	3	A3	0.000790123	Several	Daily	37	Automatic	37DCA	25067	4.3991
23	sp	Anti-human IgG	standard	3	A3	0.000790123	Stock	Stock	37	Manual	37SSM	30502	4.48433
24	sp	Anti-human IgG	standard	3	A3	0.000790123	Stock	Daily	37	Manual	37DSM	30255.5	4.4808
25	sp	Anti-human IgG	standard	3	A3	0.000790123	Several	Daily	22	Automatic	22DCA	28818.5	4.45967
26	sp	Anti-human IgG	standard	3	A3	0.000790123	Stock	Daily	22	Manual	22DSM	24964.5	4.39732
27	sp	Anti-human IgG	standard	3	A3	0.000790123	Several	Daily	37	Automatic	37DCA	28846	4.46009
28	sp	Anti-human IgG	standard	3	A3	0.000790123	Several	Stock	37	Automatic	37SCA	30321.5	4.48175
29	sp	Anti-human IgG	standard	3	A3	0.000790123	Stock	Daily	22	Manual	22DSM	26490.5	4.42309
30	sp	Anti-human IgG	standard	3	A3	0.000790123	Several	Daily	22	Manual	22DCM	24392	4.38725
31	sp	Anti-human IgG	standard	3	A3	0.000790123	Several	Stock	22	Manual	22SCM	23801	4.3766
32	sp	Anti-human IgG	standard	3	A3	0.000790123	Stock	Stock	37	Automatic	37SSA	24234	4.38443
33	sp	Anti-human IgG	standard	3	A3	0.000790123	Stock	Stock	22	Manual	22SSM	25794	4.41152
34	sp	Anti-human IgG	standard	3	A3	0.000790123	Stock	Daily	22	Automatic	22DSA	23775.5	4.37613
35	sp	Anti-human IgG	standard	3	A3	0.000790123	Several	Daily	37	Manual	37DCM	24882.5	4.39589
36	sp	Anti-human IgG	standard	3	A3	0.000790123	Several	Daily	22	Automatic	22DCA	30470	4.48387
37	sp	Anti-human IgG	standard	3	A3	0.000790123	Stock	Stock	37	Manual	37SSM	32288.5	4.50905
38	sp	Anti-human IgG	standard	3	A3	0.000790123	Stock	Stock	37	Automatic	37SSA	31829	4.50282
39	sp	Anti-human IgG	standard	3	A3	0.000790123	Several	Stock	22	Manual	22SCM	31969	4.50473
40	sp	Anti-human IgG	standard	3	A3	0.000790123	Stock	Stock	22	Automatic	22SSA	30115	4.47878
41	sp	Anti-human IgG	standard	3	A3	0.000790123	Several	Daily	37	Manual	37DCM	32181.5	4.50761
42	sp	Anti-human IgG	standard	3	A3	0.000790123	Several	Daily	22	Automatic	22DCA	31038	4.49189
43	sp	Anti-human IgG	standard	3	A3	0.000790123	Stock	Daily	37	Automatic	37DSA	30729	4.48755
44	sp	Anti-human IgG	standard	3	A3	0.000790123	Several	Stock	22	Automatic	22SCA	30302.5	4.48148
45	sp	Anti-human IgG	standard	3	A3	0.000790123	Several	Stock	22	Automatic	22SCA	32104	4.50656
46	sp	Anti-human IgG	standard	3	A3	0.000790123	Stock	Daily	37	Manual	37DSM	30486	4.4841
47	sp	Anti-human IgG	standard	3	A3	0.000790123	Several	Stock	37	Automatic	37SCA	30187.5	4.47983
48	sp	Anti-human IgG	standard	3	A3	0.000790123	Stock	Daily	22	Manual	22DSM	28239.5	4.45086
49	sp	Anti-human IgG	standard	3	A3	0.000790123	Stock	Stock	37	Automatic	37SSA	28536.5	4.4554
50	sp	Anti-human IgG	standard	3	A3	0.000790123	Stock	Daily	37	Automatic	37DSA	29706.5	4.47285
51	sp	Anti-human IgG	standard	3	A3	0.000790123	Several	Stock	37	Manual	37SCM	28650	4.45712
52	sp	Anti-human IgG	standard	3	A3	0.000790123	Stock	Stock	37	Manual	37SSM	30866.5	4.48949
53	sp	Anti-human IgG	standard	3	A3	0.000790123	Several	Stock	37	Manual	37SCM	28210	4.4504
54	sp	Anti-human IgG	standard	3	A3	0.000790123	Stock	Stock	22	Automatic	22SSA	27879.5	4.44528
55	sp	Anti-human IgG	standard	3	A3	0.000790123	Stock	Daily	22	Manual	22DSM	24981.5	4.39762
56	sp	Anti-human IgG	standard	3	A3	0.000790123	Several	Stock	22	Manual	22SCM	23741	4.3755
57	sp	Anti-human IgG	standard	3	A3	0.000790123	Several	Daily	37	Automatic	37DCA	29827	4.47461
58	sp	Anti-human IgG	standard	3	A3	0.000790123	Several	Daily	37	Automatic	37DCA	25712.5	4.41014
59	sp	Anti-human IgG	standard	3	A3	0.000790123	Several	Daily	22	Manual	22DCM	27341	4.43681
60	sp	Anti-human IgG	standard	3	A3	0.000790123	Several	Daily	37	Manual	37DCM	27728.5	4.44293
61	sp	Anti-human IgG	standard	3	A3	0.000790123	Several	Stock	37	Automatic	37SCA	26811	4.42831
62	sp	Anti-human IgG	standard	3	A3	0.000790123	Several	Daily	22	Manual	22DCM	26333	4.4205
63	sp	Anti-human IgG	standard	3	A3	0.000790123	Several	Stock	22	Manual	22SCM	25643	4.40897
64	sp	Anti-human IgG	standard	3	A3	0.000790123	Several	Daily	22	Automatic	22DCA	26178.5	4.41794
1	sp	Anti-human IgG	standard	5	A4	0.000156074	Stock	Daily	22	Automatic	22DSA	24373.5	4.38692
2	sp	Anti-human IgG	standard	5	A4	0.000156074	Stock	Stock	22	Automatic	22SSA	23635	4.37356
3	sp	Anti-human IgG	standard	5	A4	0.000156074	Stock	Stock	37	Automatic	37SSA	24939.5	4.39689
4	sp	Anti-human IgG	standard	5	A4	0.000156074	Stock	Stock	37	Manual	37SSM	29372	4.46793
5	sp	Anti-human IgG	standard	5	A4	0.000156074	Stock	Daily	37	Manual	37DSM	28911	4.46106
6	sp	Anti-human IgG	standard	5	A4	0.000156074	Stock	Stock	22	Manual	22SSM	24315.5	4.38588
7	sp	Anti-human IgG	standard	5	A4	0.000156074	Several	Stock	37	Manual	37SCM	29306	4.46696
8	sp	Anti-human IgG	standard	5	A4	0.000156074	Stock	Daily	22	Automatic	22DSA	26130	4.41714
9	sp	Anti-human IgG	standard	5	A4	0.000156074	Several	Stock	37	Manual	37SCM	28666.5	4.45737
10	sp	Anti-human IgG	standard	5	A4	0.000156074	Stock	Stock	22	Automatic	22SSA	27259	4.43551
11	sp	Anti-human IgG	standard	5	A4	0.000156074	Several	Daily	22	Automatic	22DCA	26518.5	4.42355
12	sp	Anti-human IgG	standard	5	A4	0.000156074	Several	Stock	22	Manual	22SCM	24246	4.38464
13	sp	Anti-human IgG	standard	5	A4	0.000156074	Several	Daily	37	Automatic	37DCA	26077	4.41626
14	sp	Anti-human IgG	standard	5	A4	0.000156074	Several	Daily	22	Manual	22DCM	26983.5	4.4311
15	sp	Anti-human IgG	standard	5	A4	0.000156074	Several	Stock	22	Automatic	22SCA	26622	4.42524
16	sp	Anti-human IgG	standard	5	A4	0.000156074	Stock	Daily	37	Automatic	37DSA	28418.5	4.4536
17	sp	Anti-human IgG	standard	5	A4	0.000156074	Several	Daily	37	Manual	37DCM	28000.5	4.44717
18	sp	Anti-human IgG	standard	5	A4	0.000156074	Several	Daily	22	Manual	22DCM	24334	4.38621
19	sp	Anti-human IgG	standard	5	A4	0.000156074	Several	Stock	22	Automatic	22SCA	24066.5	4.38141
20	sp	Anti-human IgG	standard	5	A4	0.000156074	Several	Daily	37	Manual	37DCM	27279	4.43583
21	sp	Anti-human IgG	standard	5	A4	0.000156074	Stock	Daily	37	Automatic	37DSA	27089.5	4.4328
22	sp	Anti-human IgG	standard	5	A4	0.000156074	Several	Daily	37	Automatic	37DCA	24815.5	4.39472
23	sp	Anti-human IgG	standard	5	A4	0.000156074	Stock	Stock	37	Manual	37SSM	28914	4.46111
24	sp	Anti-human IgG	standard	5	A4	0.000156074	Stock	Daily	37	Manual	37DSM	29322.5	4.4672
25	sp	Anti-human IgG	standard	5	A4	0.000156074	Several	Daily	22	Automatic	22DCA	26731	4.42702
26	sp	Anti-human IgG	standard	5	A4	0.000156074	Stock	Daily	22	Manual	22DSM	23209	4.36566
27	sp	Anti-human IgG	standard	5	A4	0.000156074	Several	Daily	37	Automatic	37DCA	26685.5	4.42628
28	sp	Anti-human IgG	standard	5	A4	0.000156074	Several	Stock	37	Automatic	37SCA	28646.5	4.45707
29	sp	Anti-human IgG	standard	5	A4	0.000156074	Stock	Daily	22	Manual	22DSM	25365.5	4.40424
30	sp	Anti-human IgG	standard	5	A4	0.000156074	Several	Daily	22	Manual	22DCM	24024	4.38065
31	sp	Anti-human IgG	standard	5	A4	0.000156074	Several	Stock	22	Manual	22SCM	24051	4.38113
32	sp	Anti-human IgG	standard	5	A4	0.000156074	Stock	Stock	37	Automatic	37SSA	24044.5	4.38102
33	sp	Anti-human IgG	standard	5	A4	0.000156074	Stock	Stock	22	Manual	22SSM	24302	4.38564
34	sp	Anti-human IgG	standard	5	A4	0.000156074	Stock	Daily	22	Automatic	22DSA	23859	4.37765
35	sp	Anti-human IgG	standard	5	A4	0.000156074	Several	Daily	37	Manual	37DCM	29668	4.47229
36	sp	Anti-human IgG	standard	5	A4	0.000156074	Several	Daily	22	Automatic	22DCA	28557.5	4.45572
37	sp	Anti-human IgG	standard	5	A4	0.000156074	Stock	Stock	37	Manual	37SSM	31347	4.4962
38	sp	Anti-human IgG	standard	5	A4	0.000156074	Stock	Stock	37	Automatic	37SSA	30974	4.491
39	sp	Anti-human IgG	standard	5	A4	0.000156074	Several	Stock	22	Manual	22SCM	30872.5	4.48957
40	sp	Anti-human IgG	standard	5	A4	0.000156074	Stock	Stock	22	Automatic	22SSA	27474	4.43892
41	sp	Anti-human IgG	standard	5	A4	0.000156074	Several	Daily	37	Manual	37DCM	31816	4.50265
42	sp	Anti-human IgG	standard	5	A4	0.000156074	Several	Daily	22	Automatic	22DCA	30074	4.47819
43	sp	Anti-human IgG	standard	5	A4	0.000156074	Stock	Daily	37	Automatic	37DSA	29712.5	4.47294
44	sp	Anti-human IgG	standard	5	A4	0.000156074	Several	Stock	22	Automatic	22SCA	27785.5	4.44382
45	sp	Anti-human IgG	standard	5	A4	0.000156074	Several	Stock	22	Automatic	22SCA	29647.5	4.47199
46	sp	Anti-human IgG	standard	5	A4	0.000156074	Stock	Daily	37	Manual	37DSM	28619.5	4.45666
47	sp	Anti-human IgG	standard	5	A4	0.000156074	Several	Stock	37	Automatic	37SCA	28842	4.46003
48	sp	Anti-human IgG	standard	5	A4	0.000156074	Stock	Daily	22	Manual	22DSM	23890.5	4.37823
49	sp	Anti-human IgG	standard	5	A4	0.000156074	Stock	Stock	37	Automatic	37SSA	26464	4.42266
50	sp	Anti-human IgG	standard	5	A4	0.000156074	Stock	Daily	37	Automatic	37DSA	28304.5	4.45186
51	sp	Anti-human IgG	standard	5	A4	0.000156074	Several	Stock	37	Manual	37SCM	26913	4.42996
52	sp	Anti-human IgG	standard	5	A4	0.000156074	Stock	Stock	37	Manual	37SSM	30779	4.48825
53	sp	Anti-human IgG	standard	5	A4	0.000156074	Several	Stock	37	Manual	37SCM	25993	4.41486
54	sp	Anti-human IgG	standard	5	A4	0.000156074	Stock	Stock	22	Automatic	22SSA	23323.5	4.36779
55	sp	Anti-human IgG	standard	5	A4	0.000156074	Stock	Daily	22	Manual	22DSM	24039.5	4.38093
56	sp	Anti-human IgG	standard	4	A4	0.000351166	Several	Stock	22	Manual	22SCM	18500.5	4.26718
57	sp	Anti-human IgG	standard	5	A4	0.000156074	Several	Daily	37	Automatic	37DCA	28187	4.45005
58	sp	Anti-human IgG	standard	5	A4	0.000156074	Several	Daily	37	Automatic	37DCA	24425.5	4.38784
59	sp	Anti-human IgG	standard	5	A4	0.000156074	Several	Daily	22	Manual	22DCM	25359	4.40413
60	sp	Anti-human IgG	standard	5	A4	0.000156074	Several	Daily	37	Manual	37DCM	26786	4.42791
61	sp	Anti-human IgG	standard	5	A4	0.000156074	Several	Stock	37	Automatic	37SCA	24715	4.39296
62	sp	Anti-human IgG	standard	5	A4	0.000156074	Several	Daily	22	Manual	22DCM	24007	4.38034
63	sp	Anti-human IgG	standard	5	A4	0.000156074	Several	Stock	22	Manual	22SCM	24652.5	4.39186
64	sp	Anti-human IgG	standard	5	A4	0.000156074	Several	Daily	22	Automatic	22DCA	24107	4.38214
1	sp	Anti-human IgG	standard	6	A5	6.94e-05	Stock	Daily	22	Automatic	22DSA	24257	4.38484
2	sp	Anti-human IgG	standard	6	A5	6.94e-05	Stock	Stock	22	Automatic	22SSA	24309	4.38577
3	sp	Anti-human IgG	standard	6	A5	6.94e-05	Stock	Stock	37	Automatic	37SSA	24673	4.39222
4	sp	Anti-human IgG	standard	6	A5	6.94e-05	Stock	Stock	37	Manual	37SSM	26531	4.42375
5	sp	Anti-human IgG	standard	6	A5	6.94e-05	Stock	Daily	37	Manual	37DSM	27338	4.43677
6	sp	Anti-human IgG	standard	6	A5	6.94e-05	Stock	Stock	22	Manual	22SSM	23931.5	4.37897
7	sp	Anti-human IgG	standard	6	A5	6.94e-05	Several	Stock	37	Manual	37SCM	27687	4.44228
8	sp	Anti-human IgG	standard	6	A5	6.94e-05	Stock	Daily	22	Automatic	22DSA	24452.5	4.38832
9	sp	Anti-human IgG	standard	6	A5	6.94e-05	Several	Stock	37	Manual	37SCM	25641.5	4.40894
10	sp	Anti-human IgG	standard	6	A5	6.94e-05	Stock	Stock	22	Automatic	22SSA	24629.5	4.39146
11	sp	Anti-human IgG	standard	6	A5	6.94e-05	Several	Daily	22	Automatic	22DCA	24683.5	4.39241
12	sp	Anti-human IgG	standard	6	A5	6.94e-05	Several	Stock	22	Manual	22SCM	23315	4.36764
13	sp	Anti-human IgG	standard	6	A5	6.94e-05	Several	Daily	37	Automatic	37DCA	24746	4.39351
14	sp	Anti-human IgG	standard	6	A5	6.94e-05	Several	Daily	22	Manual	22DCM	25981.5	4.41466
15	sp	Anti-human IgG	standard	6	A5	6.94e-05	Several	Stock	22	Automatic	22SCA	23166.5	4.36486
16	sp	Anti-human IgG	standard	6	A5	6.94e-05	Stock	Daily	37	Automatic	37DSA	26311.5	4.42015
17	sp	Anti-human IgG	standard	6	A5	6.94e-05	Several	Daily	37	Manual	37DCM	26135	4.41722
18	sp	Anti-human IgG	standard	6	A5	6.94e-05	Several	Daily	22	Manual	22DCM	23652.5	4.37388
19	sp	Anti-human IgG	standard	6	A5	6.94e-05	Several	Stock	22	Automatic	22SCA	23988	4.37999
20	sp	Anti-human IgG	standard	6	A5	6.94e-05	Several	Daily	37	Manual	37DCM	24519	4.3895
21	sp	Anti-human IgG	standard	6	A5	6.94e-05	Stock	Daily	37	Automatic	37DSA	26093.5	4.41653
22	sp	Anti-human IgG	standard	6	A5	6.94e-05	Several	Daily	37	Automatic	37DCA	24060.5	4.3813
23	sp	Anti-human IgG	standard	6	A5	6.94e-05	Stock	Stock	37	Manual	37SSM	26744	4.42723
24	sp	Anti-human IgG	standard	6	A5	6.94e-05	Stock	Daily	37	Manual	37DSM	27516.5	4.43959
25	sp	Anti-human IgG	standard	6	A5	6.94e-05	Several	Daily	22	Automatic	22DCA	24513.5	4.38941
26	sp	Anti-human IgG	standard	6	A5	6.94e-05	Stock	Daily	22	Manual	22DSM	17221.5	4.23607
27	sp	Anti-human IgG	standard	6	A5	6.94e-05	Several	Daily	37	Automatic	37DCA	25698	4.4099
28	sp	Anti-human IgG	standard	6	A5	6.94e-05	Several	Stock	37	Automatic	37SCA	27155.5	4.43386
29	sp	Anti-human IgG	standard	6	A5	6.94e-05	Stock	Daily	22	Manual	22DSM	24281.5	4.38528
30	sp	Anti-human IgG	standard	6	A5	6.94e-05	Several	Daily	22	Manual	22DCM	23469	4.37049
31	sp	Anti-human IgG	standard	6	A5	6.94e-05	Several	Stock	22	Manual	22SCM	23838	4.37727
32	sp	Anti-human IgG	standard	6	A5	6.94e-05	Stock	Stock	37	Automatic	37SSA	24547	4.39
33	sp	Anti-human IgG	standard	6	A5	6.94e-05	Stock	Stock	22	Manual	22SSM	23971.5	4.3797
34	sp	Anti-human IgG	standard	6	A5	6.94e-05	Stock	Daily	22	Automatic	22DSA	23105	4.36371
35	sp	Anti-human IgG	standard	6	A5	6.94e-05	Several	Daily	37	Manual	37DCM	27288.5	4.43598
36	sp	Anti-human IgG	standard	6	A5	6.94e-05	Several	Daily	22	Automatic	22DCA	23815	4.37685
37	sp	Anti-human IgG	standard	6	A5	6.94e-05	Stock	Stock	37	Manual	37SSM	30360	4.4823
38	sp	Anti-human IgG	standard	6	A5	6.94e-05	Stock	Stock	37	Automatic	37SSA	29568	4.47082
39	sp	Anti-human IgG	standard	6	A5	6.94e-05	Several	Stock	22	Manual	22SCM	27302	4.43619
40	sp	Anti-human IgG	standard	6	A5	6.94e-05	Stock	Stock	22	Automatic	22SSA	23256	4.36654
41	sp	Anti-human IgG	standard	6	A5	6.94e-05	Several	Daily	37	Manual	37DCM	29531	4.47028
42	sp	Anti-human IgG	standard	6	A5	6.94e-05	Several	Daily	22	Automatic	22DCA	28706.5	4.45798
43	sp	Anti-human IgG	standard	6	A5	6.94e-05	Stock	Daily	37	Automatic	37DSA	25598	4.40821
44	sp	Anti-human IgG	standard	6	A5	6.94e-05	Several	Stock	22	Automatic	22SCA	24025.5	4.38067
45	sp	Anti-human IgG	standard	6	A5	6.94e-05	Several	Stock	22	Automatic	22SCA	24441.5	4.38813
46	sp	Anti-human IgG	standard	6	A5	6.94e-05	Stock	Daily	37	Manual	37DSM	24046.5	4.38105
47	sp	Anti-human IgG	standard	6	A5	6.94e-05	Several	Stock	37	Automatic	37SCA	24557	4.39018
48	sp	Anti-human IgG	standard	6	A5	6.94e-05	Stock	Daily	22	Manual	22DSM	15141.5	4.18017
49	sp	Anti-human IgG	standard	6	A5	6.94e-05	Stock	Stock	37	Automatic	37SSA	25192	4.40126
50	sp	Anti-human IgG	standard	6	A5	6.94e-05	Stock	Daily	37	Automatic	37DSA	26987.5	4.43116
51	sp	Anti-human IgG	standard	6	A5	6.94e-05	Several	Stock	37	Manual	37SCM	24521.5	4.38955
52	sp	Anti-human IgG	standard	6	A5	6.94e-05	Stock	Stock	37	Manual	37SSM	28976	4.46204
53	sp	Anti-human IgG	standard	6	A5	6.94e-05	Several	Stock	37	Manual	37SCM	23747.5	4.37562
54	sp	Anti-human IgG	standard	6	A5	6.94e-05	Stock	Stock	22	Automatic	22SSA	23724	4.37519
55	sp	Anti-human IgG	standard	6	A5	6.94e-05	Stock	Daily	22	Manual	22DSM	21531.5	4.33307
56	sp	Anti-human IgG	standard	5	A5	0.000156074	Several	Stock	22	Manual	22SCM	10325	4.01389
57	sp	Anti-human IgG	standard	6	A5	6.94e-05	Several	Daily	37	Automatic	37DCA	27156	4.43387
58	sp	Anti-human IgG	standard	6	A5	6.94e-05	Several	Daily	37	Automatic	37DCA	24314.5	4.38587
59	sp	Anti-human IgG	standard	6	A5	6.94e-05	Several	Daily	22	Manual	22DCM	24026	4.38068
60	sp	Anti-human IgG	standard	6	A5	6.94e-05	Several	Daily	37	Manual	37DCM	24786	4.39421
61	sp	Anti-human IgG	standard	6	A5	6.94e-05	Several	Stock	37	Automatic	37SCA	23982.5	4.37989
62	sp	Anti-human IgG	standard	6	A5	6.94e-05	Several	Daily	22	Manual	22DCM	18909	4.27667
63	sp	Anti-human IgG	standard	6	A5	6.94e-05	Several	Stock	22	Manual	22SCM	23547	4.37194
64	sp	Anti-human IgG	standard	6	A5	6.94e-05	Several	Daily	22	Automatic	22DCA	24165	4.38319
1	sp	Anti-human IgG	standard	7	A6	3.08e-05	Stock	Daily	22	Automatic	22DSA	15614	4.19351
2	sp	Anti-human IgG	standard	7	A6	3.08e-05	Stock	Stock	22	Automatic	22SSA	17730.5	4.24872
3	sp	Anti-human IgG	standard	7	A6	3.08e-05	Stock	Stock	37	Automatic	37SSA	20845	4.319
4	sp	Anti-human IgG	standard	7	A6	3.08e-05	Stock	Stock	37	Manual	37SSM	22221.5	4.34677
5	sp	Anti-human IgG	standard	7	A6	3.08e-05	Stock	Daily	37	Manual	37DSM	24323.5	4.38603
6	sp	Anti-human IgG	standard	7	A6	3.08e-05	Stock	Stock	22	Manual	22SSM	11872	4.07452
7	sp	Anti-human IgG	standard	7	A6	3.08e-05	Several	Stock	37	Manual	37SCM	24069	4.38146
8	sp	Anti-human IgG	standard	7	A6	3.08e-05	Stock	Daily	22	Automatic	22DSA	15769.5	4.19782
9	sp	Anti-human IgG	standard	7	A6	3.08e-05	Several	Stock	37	Manual	37SCM	23697	4.37469
10	sp	Anti-human IgG	standard	7	A6	3.08e-05	Stock	Stock	22	Automatic	22SSA	15581.5	4.19261
11	sp	Anti-human IgG	standard	7	A6	3.08e-05	Several	Daily	22	Automatic	22DCA	16940	4.22891
12	sp	Anti-human IgG	standard	7	A6	3.08e-05	Several	Stock	22	Manual	22SCM	14581	4.16379
13	sp	Anti-human IgG	standard	7	A6	3.08e-05	Several	Daily	37	Automatic	37DCA	19302.5	4.28561
14	sp	Anti-human IgG	standard	7	A6	3.08e-05	Several	Daily	22	Manual	22DCM	19771	4.29603
15	sp	Anti-human IgG	standard	7	A6	3.08e-05	Several	Stock	22	Automatic	22SCA	17359.5	4.23954
16	sp	Anti-human IgG	standard	7	A6	3.08e-05	Stock	Daily	37	Automatic	37DSA	26077	4.41626
17	sp	Anti-human IgG	standard	7	A6	3.08e-05	Several	Daily	37	Manual	37DCM	20001.5	4.30106
18	sp	Anti-human IgG	standard	7	A6	3.08e-05	Several	Daily	22	Manual	22DCM	15071.5	4.17816
19	sp	Anti-human IgG	standard	7	A6	3.08e-05	Several	Stock	22	Automatic	22SCA	16031.5	4.20497
20	sp	Anti-human IgG	standard	7	A6	3.08e-05	Several	Daily	37	Manual	37DCM	22673.5	4.35552
21	sp	Anti-human IgG	standard	7	A6	3.08e-05	Stock	Daily	37	Automatic	37DSA	21548	4.33341
22	sp	Anti-human IgG	standard	7	A6	3.08e-05	Several	Daily	37	Automatic	37DCA	17343	4.23912
23	sp	Anti-human IgG	standard	7	A6	3.08e-05	Stock	Stock	37	Manual	37SSM	24299	4.38559
24	sp	Anti-human IgG	standard	7	A6	3.08e-05	Stock	Daily	37	Manual	37DSM	21590	4.33425
25	sp	Anti-human IgG	standard	7	A6	3.08e-05	Several	Daily	22	Automatic	22DCA	18913.5	4.27677
26	sp	Anti-human IgG	standard	7	A6	3.08e-05	Stock	Daily	22	Manual	22DSM	11749.5	4.07002
27	sp	Anti-human IgG	standard	7	A6	3.08e-05	Several	Daily	37	Automatic	37DCA	23796.5	4.37651
28	sp	Anti-human IgG	standard	7	A6	3.08e-05	Several	Stock	37	Automatic	37SCA	23774.5	4.37611
29	sp	Anti-human IgG	standard	7	A6	3.08e-05	Stock	Daily	22	Manual	22DSM	15644	4.19435
30	sp	Anti-human IgG	standard	7	A6	3.08e-05	Several	Daily	22	Manual	22DCM	13550	4.13194
31	sp	Anti-human IgG	standard	7	A6	3.08e-05	Several	Stock	22	Manual	22SCM	16545	4.21867
32	sp	Anti-human IgG	standard	7	A6	3.08e-05	Stock	Stock	37	Automatic	37SSA	21064.5	4.32355
33	sp	Anti-human IgG	standard	7	A6	3.08e-05	Stock	Stock	22	Manual	22SSM	16308.5	4.21241
34	sp	Anti-human IgG	standard	7	A6	3.08e-05	Stock	Daily	22	Automatic	22DSA	19858	4.29794
35	sp	Anti-human IgG	standard	7	A6	3.08e-05	Several	Daily	37	Manual	37DCM	23404	4.36929
36	sp	Anti-human IgG	standard	7	A6	3.08e-05	Several	Daily	22	Automatic	22DCA	15403	4.18761
37	sp	Anti-human IgG	standard	7	A6	3.08e-05	Stock	Stock	37	Manual	37SSM	26947	4.43051
38	sp	Anti-human IgG	standard	7	A6	3.08e-05	Stock	Stock	37	Automatic	37SSA	23621.5	4.37331
39	sp	Anti-human IgG	standard	7	A6	3.08e-05	Several	Stock	22	Manual	22SCM	18881	4.27602
40	sp	Anti-human IgG	standard	7	A6	3.08e-05	Stock	Stock	22	Automatic	22SSA	13175.5	4.11977
41	sp	Anti-human IgG	standard	7	A6	3.08e-05	Several	Daily	37	Manual	37DCM	23850.5	4.3775
42	sp	Anti-human IgG	standard	7	A6	3.08e-05	Several	Daily	22	Automatic	22DCA	26747	4.42728
43	sp	Anti-human IgG	standard	7	A6	3.08e-05	Stock	Daily	37	Automatic	37DSA	21232.5	4.327
44	sp	Anti-human IgG	standard	7	A6	3.08e-05	Several	Stock	22	Automatic	22SCA	14842.5	4.17151
45	sp	Anti-human IgG	standard	7	A6	3.08e-05	Several	Stock	22	Automatic	22SCA	14108	4.14947
46	sp	Anti-human IgG	standard	7	A6	3.08e-05	Stock	Daily	37	Manual	37DSM	15702.5	4.19597
47	sp	Anti-human IgG	standard	7	A6	3.08e-05	Several	Stock	37	Automatic	37SCA	16419.5	4.21536
48	sp	Anti-human IgG	standard	7	A6	3.08e-05	Stock	Daily	22	Manual	22DSM	9903.5	3.99579
49	sp	Anti-human IgG	standard	7	A6	3.08e-05	Stock	Stock	37	Automatic	37SSA	21547	4.33339
50	sp	Anti-human IgG	standard	7	A6	3.08e-05	Stock	Daily	37	Automatic	37DSA	23625	4.37337
51	sp	Anti-human IgG	standard	7	A6	3.08e-05	Several	Stock	37	Manual	37SCM	18569.5	4.2688
52	sp	Anti-human IgG	standard	7	A6	3.08e-05	Stock	Stock	37	Manual	37SSM	25302	4.40315
53	sp	Anti-human IgG	standard	7	A6	3.08e-05	Several	Stock	37	Manual	37SCM	16479.5	4.21694
54	sp	Anti-human IgG	standard	7	A6	3.08e-05	Stock	Stock	22	Automatic	22SSA	12827.5	4.10814
55	sp	Anti-human IgG	standard	7	A6	3.08e-05	Stock	Daily	22	Manual	22DSM	11539.5	4.06219
56	sp	Anti-human IgG	standard	7	A6	3.08e-05	Several	Stock	22	Manual	22SCM	2768.5	3.44224
57	sp	Anti-human IgG	standard	7	A6	3.08e-05	Several	Daily	37	Automatic	37DCA	21465	4.33173
58	sp	Anti-human IgG	standard	7	A6	3.08e-05	Several	Daily	37	Automatic	37DCA	18675.5	4.27127
59	sp	Anti-human IgG	standard	7	A6	3.08e-05	Several	Daily	22	Manual	22DCM	14186.5	4.15188
60	sp	Anti-human IgG	standard	7	A6	3.08e-05	Several	Daily	37	Manual	37DCM	23771.5	4.37606
61	sp	Anti-human IgG	standard	7	A6	3.08e-05	Several	Stock	37	Automatic	37SCA	16875.5	4.22726
62	sp	Anti-human IgG	standard	7	A6	3.08e-05	Several	Daily	22	Manual	22DCM	12633.5	4.10152
63	sp	Anti-human IgG	standard	7	A6	3.08e-05	Several	Stock	22	Manual	22SCM	14453.5	4.15997
64	sp	Anti-human IgG	standard	7	A6	3.08e-05	Several	Daily	22	Automatic	22DCA	15380	4.18696
1	sp	Anti-human IgG	standard	9	A7	6.09e-06	Stock	Daily	22	Automatic	22DSA	5210.5	3.71688
2	sp	Anti-human IgG	standard	9	A7	6.09e-06	Stock	Stock	22	Automatic	22SSA	5230	3.7185
3	sp	Anti-human IgG	standard	9	A7	6.09e-06	Stock	Stock	37	Automatic	37SSA	8010	3.90363
4	sp	Anti-human IgG	standard	9	A7	6.09e-06	Stock	Stock	37	Manual	37SSM	7492	3.8746
5	sp	Anti-human IgG	standard	9	A7	6.09e-06	Stock	Daily	37	Manual	37DSM	10946	4.03926
6	sp	Anti-human IgG	standard	9	A7	6.09e-06	Stock	Stock	22	Manual	22SSM	3516	3.54605
7	sp	Anti-human IgG	standard	9	A7	6.09e-06	Several	Stock	37	Manual	37SCM	7390.5	3.86867
8	sp	Anti-human IgG	standard	9	A7	6.09e-06	Stock	Daily	22	Automatic	22DSA	5249.5	3.72012
9	sp	Anti-human IgG	standard	9	A7	6.09e-06	Several	Stock	37	Manual	37SCM	6473	3.81111
10	sp	Anti-human IgG	standard	9	A7	6.09e-06	Stock	Stock	22	Automatic	22SSA	6125	3.78711
11	sp	Anti-human IgG	standard	9	A7	6.09e-06	Several	Daily	22	Automatic	22DCA	5006	3.69949
12	sp	Anti-human IgG	standard	9	A7	6.09e-06	Several	Stock	22	Manual	22SCM	5036.5	3.70213
13	sp	Anti-human IgG	standard	9	A7	6.09e-06	Several	Daily	37	Automatic	37DCA	9273	3.96722
14	sp	Anti-human IgG	standard	9	A7	6.09e-06	Several	Daily	22	Manual	22DCM	6844	3.83531
15	sp	Anti-human IgG	standard	9	A7	6.09e-06	Several	Stock	22	Automatic	22SCA	6815	3.83347
16	sp	Anti-human IgG	standard	9	A7	6.09e-06	Stock	Daily	37	Automatic	37DSA	8818.5	3.94539
17	sp	Anti-human IgG	standard	9	A7	6.09e-06	Several	Daily	37	Manual	37DCM	6981	3.84392
18	sp	Anti-human IgG	standard	9	A7	6.09e-06	Several	Daily	22	Manual	22DCM	4912.5	3.6913
19	sp	Anti-human IgG	standard	9	A7	6.09e-06	Several	Stock	22	Automatic	22SCA	4610.5	3.66375
20	sp	Anti-human IgG	standard	9	A7	6.09e-06	Several	Daily	37	Manual	37DCM	6763	3.83014
21	sp	Anti-human IgG	standard	9	A7	6.09e-06	Stock	Daily	37	Automatic	37DSA	7119	3.85242
22	sp	Anti-human IgG	standard	9	A7	6.09e-06	Several	Daily	37	Automatic	37DCA	5786	3.76238
23	sp	Anti-human IgG	standard	9	A7	6.09e-06	Stock	Stock	37	Manual	37SSM	7227	3.85896
24	sp	Anti-human IgG	standard	9	A7	6.09e-06	Stock	Daily	37	Manual	37DSM	6581.5	3.81832
25	sp	Anti-human IgG	standard	9	A7	6.09e-06	Several	Daily	22	Automatic	22DCA	5799.5	3.76339
26	sp	Anti-human IgG	standard	9	A7	6.09e-06	Stock	Daily	22	Manual	22DSM	2913.5	3.46442
27	sp	Anti-human IgG	standard	9	A7	6.09e-06	Several	Daily	37	Automatic	37DCA	7331	3.86516
28	sp	Anti-human IgG	standard	9	A7	6.09e-06	Several	Stock	37	Automatic	37SCA	7471	3.87338
29	sp	Anti-human IgG	standard	9	A7	6.09e-06	Stock	Daily	22	Manual	22DSM	4380	3.64147
30	sp	Anti-human IgG	standard	9	A7	6.09e-06	Several	Daily	22	Manual	22DCM	3845.5	3.58495
31	sp	Anti-human IgG	standard	9	A7	6.09e-06	Several	Stock	22	Manual	22SCM	4544	3.65744
32	sp	Anti-human IgG	standard	9	A7	6.09e-06	Stock	Stock	37	Automatic	37SSA	6375.5	3.80451
33	sp	Anti-human IgG	standard	9	A7	6.09e-06	Stock	Stock	22	Manual	22SSM	6222.5	3.79396
34	sp	Anti-human IgG	standard	9	A7	6.09e-06	Stock	Daily	22	Automatic	22DSA	7575.5	3.87941
35	sp	Anti-human IgG	standard	9	A7	6.09e-06	Several	Daily	37	Manual	37DCM	10765	4.03201
36	sp	Anti-human IgG	standard	9	A7	6.09e-06	Several	Daily	22	Automatic	22DCA	6857.5	3.83617
37	sp	Anti-human IgG	standard	9	A7	6.09e-06	Stock	Stock	37	Manual	37SSM	7781.5	3.89106
38	sp	Anti-human IgG	standard	9	A7	6.09e-06	Stock	Stock	37	Automatic	37SSA	6179	3.79092
39	sp	Anti-human IgG	standard	9	A7	6.09e-06	Several	Stock	22	Manual	22SCM	5246	3.71983
40	sp	Anti-human IgG	standard	9	A7	6.09e-06	Stock	Stock	22	Automatic	22SSA	3478	3.54133
41	sp	Anti-human IgG	standard	9	A7	6.09e-06	Several	Daily	37	Manual	37DCM	7166.5	3.85531
42	sp	Anti-human IgG	standard	9	A7	6.09e-06	Several	Daily	22	Automatic	22DCA	7893.5	3.89727
43	sp	Anti-human IgG	standard	9	A7	6.09e-06	Stock	Daily	37	Automatic	37DSA	6380.5	3.80485
44	sp	Anti-human IgG	standard	9	A7	6.09e-06	Several	Stock	22	Automatic	22SCA	2937	3.4679
45	sp	Anti-human IgG	standard	9	A7	6.09e-06	Several	Stock	22	Automatic	22SCA	3880	3.58883
46	sp	Anti-human IgG	standard	9	A7	6.09e-06	Stock	Daily	37	Manual	37DSM	4498	3.65302
47	sp	Anti-human IgG	standard	9	A7	6.09e-06	Several	Stock	37	Automatic	37SCA	4527	3.65581
48	sp	Anti-human IgG	standard	9	A7	6.09e-06	Stock	Daily	22	Manual	22DSM	2432.5	3.38605
49	sp	Anti-human IgG	standard	9	A7	6.09e-06	Stock	Stock	37	Automatic	37SSA	6822.5	3.83394
50	sp	Anti-human IgG	standard	9	A7	6.09e-06	Stock	Daily	37	Automatic	37DSA	6887	3.83803
51	sp	Anti-human IgG	standard	9	A7	6.09e-06	Several	Stock	37	Manual	37SCM	5576	3.74632
52	sp	Anti-human IgG	standard	9	A7	6.09e-06	Stock	Stock	37	Manual	37SSM	8183	3.91291
53	sp	Anti-human IgG	standard	9	A7	6.09e-06	Several	Stock	37	Manual	37SCM	4374	3.64088
54	sp	Anti-human IgG	standard	9	A7	6.09e-06	Stock	Stock	22	Automatic	22SSA	4174.5	3.6206
55	sp	Anti-human IgG	standard	9	A7	6.09e-06	Stock	Daily	22	Manual	22DSM	3063.5	3.48622
56	sp	Anti-human IgG	standard	8	A7	1.37e-05	Several	Stock	22	Manual	22SCM	1480	3.17026
57	sp	Anti-human IgG	standard	9	A7	6.09e-06	Several	Daily	37	Automatic	37DCA	5735.5	3.75857
58	sp	Anti-human IgG	standard	9	A7	6.09e-06	Several	Daily	37	Automatic	37DCA	5755	3.76005
59	sp	Anti-human IgG	standard	9	A7	6.09e-06	Several	Daily	22	Manual	22DCM	3882	3.58906
60	sp	Anti-human IgG	standard	9	A7	6.09e-06	Several	Daily	37	Manual	37DCM	8575	3.93323
61	sp	Anti-human IgG	standard	9	A7	6.09e-06	Several	Stock	37	Automatic	37SCA	5079	3.70578
62	sp	Anti-human IgG	standard	9	A7	6.09e-06	Several	Daily	22	Manual	22DCM	3029	3.4813
63	sp	Anti-human IgG	standard	9	A7	6.09e-06	Several	Stock	22	Manual	22SCM	4017	3.6039
64	sp	Anti-human IgG	standard	9	A7	6.09e-06	Several	Daily	22	Automatic	22DCA	4230	3.62634
1	sp	Anti-human IgG	standard	10	A8	2.71e-06	Stock	Daily	22	Automatic	22DSA	3765.5	3.57582
2	sp	Anti-human IgG	standard	10	A8	2.71e-06	Stock	Stock	22	Automatic	22SSA	2447	3.38863
3	sp	Anti-human IgG	standard	10	A8	2.71e-06	Stock	Stock	37	Automatic	37SSA	5250	3.72016
4	sp	Anti-human IgG	standard	10	A8	2.71e-06	Stock	Stock	37	Manual	37SSM	4015	3.60369
5	sp	Anti-human IgG	standard	10	A8	2.71e-06	Stock	Daily	37	Manual	37DSM	6227.5	3.79431
6	sp	Anti-human IgG	standard	10	A8	2.71e-06	Stock	Stock	22	Manual	22SSM	1934	3.28646
7	sp	Anti-human IgG	standard	10	A8	2.71e-06	Several	Stock	37	Manual	37SCM	4233.5	3.6267
8	sp	Anti-human IgG	standard	10	A8	2.71e-06	Stock	Daily	22	Automatic	22DSA	3543.5	3.54943
9	sp	Anti-human IgG	standard	10	A8	2.71e-06	Several	Stock	37	Manual	37SCM	3679	3.56573
10	sp	Anti-human IgG	standard	10	A8	2.71e-06	Stock	Stock	22	Automatic	22SSA	3880	3.58883
11	sp	Anti-human IgG	standard	10	A8	2.71e-06	Several	Daily	22	Automatic	22DCA	2766	3.44185
12	sp	Anti-human IgG	standard	10	A8	2.71e-06	Several	Stock	22	Manual	22SCM	3468.5	3.54014
13	sp	Anti-human IgG	standard	10	A8	2.71e-06	Several	Daily	37	Automatic	37DCA	4579	3.66077
14	sp	Anti-human IgG	standard	10	A8	2.71e-06	Several	Daily	22	Manual	22DCM	3013	3.479
15	sp	Anti-human IgG	standard	10	A8	2.71e-06	Several	Stock	22	Automatic	22SCA	3706	3.56891
16	sp	Anti-human IgG	standard	10	A8	2.71e-06	Stock	Daily	37	Automatic	37DSA	5084	3.70621
17	sp	Anti-human IgG	standard	10	A8	2.71e-06	Several	Daily	37	Manual	37DCM	4079.5	3.61061
18	sp	Anti-human IgG	standard	10	A8	2.71e-06	Several	Daily	22	Manual	22DCM	3344.5	3.52433
19	sp	Anti-human IgG	standard	10	A8	2.71e-06	Several	Stock	22	Automatic	22SCA	2770	3.44248
20	sp	Anti-human IgG	standard	10	A8	2.71e-06	Several	Daily	37	Manual	37DCM	4534	3.65648
21	sp	Anti-human IgG	standard	10	A8	2.71e-06	Stock	Daily	37	Automatic	37DSA	4164	3.61951
22	sp	Anti-human IgG	standard	10	A8	2.71e-06	Several	Daily	37	Automatic	37DCA	3322	3.5214
23	sp	Anti-human IgG	standard	10	A8	2.71e-06	Stock	Stock	37	Manual	37SSM	4181.5	3.62133
24	sp	Anti-human IgG	standard	10	A8	2.71e-06	Stock	Daily	37	Manual	37DSM	5243	3.71958
25	sp	Anti-human IgG	standard	10	A8	2.71e-06	Several	Daily	22	Automatic	22DCA	3110	3.49276
26	sp	Anti-human IgG	standard	10	A8	2.71e-06	Stock	Daily	22	Manual	22DSM	1706.5	3.23211
27	sp	Anti-human IgG	standard	10	A8	2.71e-06	Several	Daily	37	Automatic	37DCA	4120	3.6149
28	sp	Anti-human IgG	standard	10	A8	2.71e-06	Several	Stock	37	Automatic	37SCA	4253	3.6287
29	sp	Anti-human IgG	standard	10	A8	2.71e-06	Stock	Daily	22	Manual	22DSM	2385.5	3.37758
30	sp	Anti-human IgG	standard	10	A8	2.71e-06	Several	Daily	22	Manual	22DCM	2181	3.33866
31	sp	Anti-human IgG	standard	10	A8	2.71e-06	Several	Stock	22	Manual	22SCM	2514	3.40037
32	sp	Anti-human IgG	standard	10	A8	2.71e-06	Stock	Stock	37	Automatic	37SSA	3424.5	3.5346
33	sp	Anti-human IgG	standard	10	A8	2.71e-06	Stock	Stock	22	Manual	22SSM	4465	3.64982
34	sp	Anti-human IgG	standard	10	A8	2.71e-06	Stock	Daily	22	Automatic	22DSA	24306.5	4.38572
35	sp	Anti-human IgG	standard	10	A8	2.71e-06	Several	Daily	37	Manual	37DCM	7849.5	3.89484
36	sp	Anti-human IgG	standard	10	A8	2.71e-06	Several	Daily	22	Automatic	22DCA	5538	3.74335
37	sp	Anti-human IgG	standard	10	A8	2.71e-06	Stock	Stock	37	Manual	37SSM	4151	3.61815
38	sp	Anti-human IgG	standard	10	A8	2.71e-06	Stock	Stock	37	Automatic	37SSA	3879	3.58872
39	sp	Anti-human IgG	standard	10	A8	2.71e-06	Several	Stock	22	Manual	22SCM	3007.5	3.47821
40	sp	Anti-human IgG	standard	10	A8	2.71e-06	Stock	Stock	22	Automatic	22SSA	2057.5	3.31334
41	sp	Anti-human IgG	standard	10	A8	2.71e-06	Several	Daily	37	Manual	37DCM	4347	3.63819
42	sp	Anti-human IgG	standard	10	A8	2.71e-06	Several	Daily	22	Automatic	22DCA	5660	3.75282
43	sp	Anti-human IgG	standard	10	A8	2.71e-06	Stock	Daily	37	Automatic	37DSA	3207	3.5061
44	sp	Anti-human IgG	standard	10	A8	2.71e-06	Several	Stock	22	Automatic	22SCA	2222.5	3.34684
45	sp	Anti-human IgG	standard	10	A8	2.71e-06	Several	Stock	22	Automatic	22SCA	2128	3.32797
46	sp	Anti-human IgG	standard	10	A8	2.71e-06	Stock	Daily	37	Manual	37DSM	2606.5	3.41606
47	sp	Anti-human IgG	standard	10	A8	2.71e-06	Several	Stock	37	Automatic	37SCA	2681	3.4283
48	sp	Anti-human IgG	standard	10	A8	2.71e-06	Stock	Daily	22	Manual	22DSM	1505	3.17754
49	sp	Anti-human IgG	standard	10	A8	2.71e-06	Stock	Stock	37	Automatic	37SSA	3243.5	3.51101
50	sp	Anti-human IgG	standard	10	A8	2.71e-06	Stock	Daily	37	Automatic	37DSA	3906	3.59173
51	sp	Anti-human IgG	standard	10	A8	2.71e-06	Several	Stock	37	Manual	37SCM	2880	3.45939
52	sp	Anti-human IgG	standard	10	A8	2.71e-06	Stock	Stock	37	Manual	37SSM	4924	3.69232
53	sp	Anti-human IgG	standard	10	A8	2.71e-06	Several	Stock	37	Manual	37SCM	2758	3.44059
54	sp	Anti-human IgG	standard	10	A8	2.71e-06	Stock	Stock	22	Automatic	22SSA	2417	3.38328
55	sp	Anti-human IgG	standard	10	A8	2.71e-06	Stock	Daily	22	Manual	22DSM	1838	3.26435
56	sp	Anti-human IgG	standard	10	A8	2.71e-06	Several	Stock	22	Manual	22SCM	1051	3.0216
57	sp	Anti-human IgG	standard	10	A8	2.71e-06	Several	Daily	37	Automatic	37DCA	3411	3.53288
58	sp	Anti-human IgG	standard	10	A8	2.71e-06	Several	Daily	37	Automatic	37DCA	3468.5	3.54014
59	sp	Anti-human IgG	standard	10	A8	2.71e-06	Several	Daily	22	Manual	22DCM	2376.5	3.37594
60	sp	Anti-human IgG	standard	10	A8	2.71e-06	Several	Daily	37	Manual	37DCM	4448	3.64816
61	sp	Anti-human IgG	standard	10	A8	2.71e-06	Several	Stock	37	Automatic	37SCA	2494	3.3969
62	sp	Anti-human IgG	standard	10	A8	2.71e-06	Several	Daily	22	Manual	22DCM	1830	3.26245
63	sp	Anti-human IgG	standard	10	A8	2.71e-06	Several	Stock	22	Manual	22SCM	2004.5	3.30201
64	sp	Anti-human IgG	standard	10	A8	2.71e-06	Several	Daily	22	Automatic	22DCA	3622	3.55895
1	sp	Anti-human IgG	standard	11	A9	1.2e-06	Stock	Daily	22	Automatic	22DSA	2884.5	3.46007
2	sp	Anti-human IgG	standard	11	A9	1.2e-06	Stock	Stock	22	Automatic	22SSA	2067.5	3.31545
3	sp	Anti-human IgG	standard	11	A9	1.2e-06	Stock	Stock	37	Automatic	37SSA	3903	3.5914
4	sp	Anti-human IgG	standard	11	A9	1.2e-06	Stock	Stock	37	Manual	37SSM	2691.5	3.42999
5	sp	Anti-human IgG	standard	11	A9	1.2e-06	Stock	Daily	37	Manual	37DSM	4882	3.6886
6	sp	Anti-human IgG	standard	11	A9	1.2e-06	Stock	Stock	22	Manual	22SSM	1391	3.14333
7	sp	Anti-human IgG	standard	11	A9	1.2e-06	Several	Stock	37	Manual	37SCM	2743.5	3.4383
8	sp	Anti-human IgG	standard	11	A9	1.2e-06	Stock	Daily	22	Automatic	22DSA	2803.5	3.4477
9	sp	Anti-human IgG	standard	11	A9	1.2e-06	Several	Stock	37	Manual	37SCM	2326.5	3.3667
10	sp	Anti-human IgG	standard	11	A9	1.2e-06	Stock	Stock	22	Automatic	22SSA	3128	3.49527
11	sp	Anti-human IgG	standard	11	A9	1.2e-06	Several	Daily	22	Automatic	22DCA	1865	3.27068
12	sp	Anti-human IgG	standard	11	A9	1.2e-06	Several	Stock	22	Manual	22SCM	2737	3.43727
13	sp	Anti-human IgG	standard	11	A9	1.2e-06	Several	Daily	37	Automatic	37DCA	3123.5	3.49464
14	sp	Anti-human IgG	standard	11	A9	1.2e-06	Several	Daily	22	Manual	22DCM	1987.5	3.29831
15	sp	Anti-human IgG	standard	11	A9	1.2e-06	Several	Stock	22	Automatic	22SCA	2454.5	3.38996
16	sp	Anti-human IgG	standard	11	A9	1.2e-06	Stock	Daily	37	Automatic	37DSA	3096	3.4908
17	sp	Anti-human IgG	standard	11	A9	1.2e-06	Several	Daily	37	Manual	37DCM	2524.5	3.40218
18	sp	Anti-human IgG	standard	11	A9	1.2e-06	Several	Daily	22	Manual	22DCM	2617.5	3.41789
19	sp	Anti-human IgG	standard	11	A9	1.2e-06	Several	Stock	22	Automatic	22SCA	1605.5	3.20561
20	sp	Anti-human IgG	standard	11	A9	1.2e-06	Several	Daily	37	Manual	37DCM	27812	4.44423
21	sp	Anti-human IgG	standard	11	A9	1.2e-06	Stock	Daily	37	Automatic	37DSA	2746	3.4387
22	sp	Anti-human IgG	standard	11	A9	1.2e-06	Several	Daily	37	Automatic	37DCA	2205	3.34341
23	sp	Anti-human IgG	standard	11	A9	1.2e-06	Stock	Stock	37	Manual	37SSM	2567	3.40943
24	sp	Anti-human IgG	standard	11	A9	1.2e-06	Stock	Daily	37	Manual	37DSM	3969.5	3.59874
25	sp	Anti-human IgG	standard	11	A9	1.2e-06	Several	Daily	22	Automatic	22DCA	2046	3.31091
26	sp	Anti-human IgG	standard	11	A9	1.2e-06	Stock	Daily	22	Manual	22DSM	1022	3.00945
27	sp	Anti-human IgG	standard	11	A9	1.2e-06	Several	Daily	37	Automatic	37DCA	2426	3.38489
28	sp	Anti-human IgG	standard	11	A9	1.2e-06	Several	Stock	37	Automatic	37SCA	2608.5	3.41639
29	sp	Anti-human IgG	standard	11	A9	1.2e-06	Stock	Daily	22	Manual	22DSM	1387.5	3.14223
30	sp	Anti-human IgG	standard	11	A9	1.2e-06	Several	Daily	22	Manual	22DCM	1485.5	3.17187
31	sp	Anti-human IgG	standard	11	A9	1.2e-06	Several	Stock	22	Manual	22SCM	1591	3.20167
32	sp	Anti-human IgG	standard	11	A9	1.2e-06	Stock	Stock	37	Automatic	37SSA	1811.5	3.25804
33	sp	Anti-human IgG	standard	11	A9	1.2e-06	Stock	Stock	22	Manual	22SSM	3828	3.58297
34	sp	Anti-human IgG	standard	11	A9	1.2e-06	Stock	Daily	22	Automatic	22DSA	5528.5	3.74261
35	sp	Anti-human IgG	standard	11	A9	1.2e-06	Several	Daily	37	Manual	37DCM	7174	3.85576
36	sp	Anti-human IgG	standard	11	A9	1.2e-06	Several	Daily	22	Automatic	22DCA	5116.5	3.70897
37	sp	Anti-human IgG	standard	11	A9	1.2e-06	Stock	Stock	37	Manual	37SSM	2537.5	3.40441
38	sp	Anti-human IgG	standard	11	A9	1.2e-06	Stock	Stock	37	Automatic	37SSA	2505	3.39881
39	sp	Anti-human IgG	standard	11	A9	1.2e-06	Several	Stock	22	Manual	22SCM	1863.5	3.27033
40	sp	Anti-human IgG	standard	11	A9	1.2e-06	Stock	Stock	22	Automatic	22SSA	1312	3.11793
41	sp	Anti-human IgG	standard	11	A9	1.2e-06	Several	Daily	37	Manual	37DCM	2763	3.44138
42	sp	Anti-human IgG	standard	11	A9	1.2e-06	Several	Daily	22	Automatic	22DCA	3934	3.59483
43	sp	Anti-human IgG	standard	11	A9	1.2e-06	Stock	Daily	37	Automatic	37DSA	2014.5	3.30417
44	sp	Anti-human IgG	standard	11	A9	1.2e-06	Several	Stock	22	Automatic	22SCA	1337	3.12613
45	sp	Anti-human IgG	standard	11	A9	1.2e-06	Several	Stock	22	Automatic	22SCA	1270.5	3.10397
46	sp	Anti-human IgG	standard	11	A9	1.2e-06	Stock	Daily	37	Manual	37DSM	1541	3.1878
47	sp	Anti-human IgG	standard	11	A9	1.2e-06	Several	Stock	37	Automatic	37SCA	1655	3.2188
48	sp	Anti-human IgG	standard	11	A9	1.2e-06	Stock	Daily	22	Manual	22DSM	959.5	2.98204
49	sp	Anti-human IgG	standard	11	A9	1.2e-06	Stock	Stock	37	Automatic	37SSA	2270.5	3.35612
50	sp	Anti-human IgG	standard	11	A9	1.2e-06	Stock	Daily	37	Automatic	37DSA	2438	3.38703
51	sp	Anti-human IgG	standard	11	A9	1.2e-06	Several	Stock	37	Manual	37SCM	1736	3.23955
52	sp	Anti-human IgG	standard	11	A9	1.2e-06	Stock	Stock	37	Manual	37SSM	2169.5	3.33636
53	sp	Anti-human IgG	standard	11	A9	1.2e-06	Several	Stock	37	Manual	37SCM	1502	3.17667
54	sp	Anti-human IgG	standard	11	A9	1.2e-06	Stock	Stock	22	Automatic	22SSA	1474	3.1685
55	sp	Anti-human IgG	standard	11	A9	1.2e-06	Stock	Daily	22	Manual	22DSM	1018	3.00775
56	sp	Anti-human IgG	standard	11	A9	1.2e-06	Several	Stock	22	Manual	22SCM	838	2.92324
57	sp	Anti-human IgG	standard	11	A9	1.2e-06	Several	Daily	37	Automatic	37DCA	1968.5	3.29414
58	sp	Anti-human IgG	standard	11	A9	1.2e-06	Several	Daily	37	Automatic	37DCA	1927.5	3.28499
59	sp	Anti-human IgG	standard	11	A9	1.2e-06	Several	Daily	22	Manual	22DCM	1395.5	3.14473
60	sp	Anti-human IgG	standard	11	A9	1.2e-06	Several	Daily	37	Manual	37DCM	2751	3.43949
61	sp	Anti-human IgG	standard	11	A9	1.2e-06	Several	Stock	37	Automatic	37SCA	1536	3.18639
62	sp	Anti-human IgG	standard	11	A9	1.2e-06	Several	Daily	22	Manual	22DCM	1147.5	3.05975
63	sp	Anti-human IgG	standard	11	A9	1.2e-06	Several	Stock	22	Manual	22SCM	1400.5	3.14628
64	sp	Anti-human IgG	standard	11	A9	1.2e-06	Several	Daily	22	Automatic	22DCA	1653.5	3.2184
1	sp	Anti-human IgG	standard	1	B1	0.004	Stock	Daily	22	Automatic	22DSA	24238.5	4.38451
2	sp	Anti-human IgG	standard	1	B1	0.004	Stock	Stock	22	Automatic	22SSA	24840.5	4.39516
3	sp	Anti-human IgG	standard	1	B1	0.004	Stock	Stock	37	Automatic	37SSA	26930	4.43024
4	sp	Anti-human IgG	standard	1	B1	0.004	Stock	Stock	37	Manual	37SSM	30307	4.48154
5	sp	Anti-human IgG	standard	1	B1	0.004	Stock	Daily	37	Manual	37DSM	30406.5	4.48297
6	sp	Anti-human IgG	standard	1	B1	0.004	Stock	Stock	22	Manual	22SSM	26534	4.4238
7	sp	Anti-human IgG	standard	1	B1	0.004	Several	Stock	37	Manual	37SCM	30916	4.49018
8	sp	Anti-human IgG	standard	1	B1	0.004	Stock	Daily	22	Automatic	22DSA	28406.5	4.45342
9	sp	Anti-human IgG	standard	1	B1	0.004	Several	Stock	37	Manual	37SCM	29430.5	4.4688
10	sp	Anti-human IgG	standard	1	B1	0.004	Stock	Stock	22	Automatic	22SSA	29930.5	4.47611
11	sp	Anti-human IgG	standard	1	B1	0.004	Several	Daily	22	Automatic	22DCA	29077.5	4.46356
12	sp	Anti-human IgG	standard	1	B1	0.004	Several	Stock	22	Manual	22SCM	26929	4.43022
13	sp	Anti-human IgG	standard	1	B1	0.004	Several	Daily	37	Automatic	37DCA	28207.5	4.45036
14	sp	Anti-human IgG	standard	1	B1	0.004	Several	Daily	22	Manual	22DCM	29961	4.47656
15	sp	Anti-human IgG	standard	1	B1	0.004	Several	Stock	22	Automatic	22SCA	27918.5	4.44589
16	sp	Anti-human IgG	standard	1	B1	0.004	Stock	Daily	37	Automatic	37DSA	29982.5	4.47687
17	sp	Anti-human IgG	standard	1	B1	0.004	Several	Daily	37	Manual	37DCM	29532	4.47029
18	sp	Anti-human IgG	standard	1	B1	0.004	Several	Daily	22	Manual	22DCM	26798.5	4.42811
19	sp	Anti-human IgG	standard	1	B1	0.004	Several	Stock	22	Automatic	22SCA	25999.5	4.41496
20	sp	Anti-human IgG	standard	1	B1	0.004	Several	Daily	37	Manual	37DCM	28253.5	4.45107
21	sp	Anti-human IgG	standard	1	B1	0.004	Stock	Daily	37	Automatic	37DSA	29464.5	4.4693
22	sp	Anti-human IgG	standard	1	B1	0.004	Several	Daily	37	Automatic	37DCA	25517.5	4.40684
23	sp	Anti-human IgG	standard	1	B1	0.004	Stock	Stock	37	Manual	37SSM	30278.5	4.48113
24	sp	Anti-human IgG	standard	1	B1	0.004	Stock	Daily	37	Manual	37DSM	30613.5	4.48591
25	sp	Anti-human IgG	standard	1	B1	0.004	Several	Daily	22	Automatic	22DCA	29253	4.46617
26	sp	Anti-human IgG	standard	1	B1	0.004	Stock	Daily	22	Manual	22DSM	25887	4.41308
27	sp	Anti-human IgG	standard	1	B1	0.004	Several	Daily	37	Automatic	37DCA	29463.5	4.46928
28	sp	Anti-human IgG	standard	1	B1	0.004	Several	Stock	37	Automatic	37SCA	29752.5	4.47352
29	sp	Anti-human IgG	standard	1	B1	0.004	Stock	Daily	22	Manual	22DSM	26805	4.42822
30	sp	Anti-human IgG	standard	1	B1	0.004	Several	Daily	22	Manual	22DCM	24456.5	4.38839
31	sp	Anti-human IgG	standard	1	B1	0.004	Several	Stock	22	Manual	22SCM	24488.5	4.38896
32	sp	Anti-human IgG	standard	1	B1	0.004	Stock	Stock	37	Automatic	37SSA	24135	4.38265
33	sp	Anti-human IgG	standard	1	B1	0.004	Stock	Stock	22	Manual	22SSM	27247	4.43532
34	sp	Anti-human IgG	standard	1	B1	0.004	Stock	Daily	22	Automatic	22DSA	23946.5	4.37924
35	sp	Anti-human IgG	standard	1	B1	0.004	Several	Daily	37	Manual	37DCM	31036	4.49187
36	sp	Anti-human IgG	standard	1	B1	0.004	Several	Daily	22	Automatic	22DCA	30915.5	4.49018
37	sp	Anti-human IgG	standard	1	B1	0.004	Stock	Stock	37	Manual	37SSM	31978.5	4.50486
38	sp	Anti-human IgG	standard	1	B1	0.004	Stock	Stock	37	Automatic	37SSA	32052.5	4.50586
39	sp	Anti-human IgG	standard	1	B1	0.004	Several	Stock	22	Manual	22SCM	32171.5	4.50747
40	sp	Anti-human IgG	standard	1	B1	0.004	Stock	Stock	22	Automatic	22SSA	30734	4.48762
41	sp	Anti-human IgG	standard	1	B1	0.004	Several	Daily	37	Manual	37DCM	32555	4.51262
42	sp	Anti-human IgG	standard	1	B1	0.004	Several	Daily	22	Automatic	22DCA	31267	4.49509
43	sp	Anti-human IgG	standard	1	B1	0.004	Stock	Daily	37	Automatic	37DSA	31257.5	4.49495
44	sp	Anti-human IgG	standard	1	B1	0.004	Several	Stock	22	Automatic	22SCA	29337	4.46742
45	sp	Anti-human IgG	standard	1	B1	0.004	Several	Stock	22	Automatic	22SCA	32174.5	4.50751
46	sp	Anti-human IgG	standard	1	B1	0.004	Stock	Daily	37	Manual	37DSM	30975	4.49101
47	sp	Anti-human IgG	standard	1	B1	0.004	Several	Stock	37	Automatic	37SCA	31107.5	4.49287
48	sp	Anti-human IgG	standard	1	B1	0.004	Stock	Daily	22	Manual	22DSM	28524.5	4.45522
49	sp	Anti-human IgG	standard	1	B1	0.004	Stock	Stock	37	Automatic	37SSA	28895.5	4.46083
50	sp	Anti-human IgG	standard	1	B1	0.004	Stock	Daily	37	Automatic	37DSA	6417	3.80733
51	sp	Anti-human IgG	standard	1	B1	0.004	Several	Stock	37	Manual	37SCM	29617.5	4.47155
52	sp	Anti-human IgG	standard	1	B1	0.004	Stock	Stock	37	Manual	37SSM	31558.5	4.49912
53	sp	Anti-human IgG	standard	1	B1	0.004	Several	Stock	37	Manual	37SCM	29108.5	4.46402
54	sp	Anti-human IgG	standard	1	B1	0.004	Stock	Stock	22	Automatic	22SSA	28375	4.45294
55	sp	Anti-human IgG	standard	1	B1	0.004	Stock	Daily	22	Manual	22DSM	26657.5	4.42582
56	sp	Anti-human IgG	standard	1	B1	0.004	Several	Stock	22	Manual	22SCM	26865	4.42919
57	sp	Anti-human IgG	standard	1	B1	0.004	Several	Daily	37	Automatic	37DCA	29692.5	4.47265
58	sp	Anti-human IgG	standard	1	B1	0.004	Several	Daily	37	Automatic	37DCA	26766.5	4.42759
59	sp	Anti-human IgG	standard	1	B1	0.004	Several	Daily	22	Manual	22DCM	29043	4.46304
60	sp	Anti-human IgG	standard	1	B1	0.004	Several	Daily	37	Manual	37DCM	28204	4.45031
61	sp	Anti-human IgG	standard	1	B1	0.004	Several	Stock	37	Automatic	37SCA	28086	4.44849
62	sp	Anti-human IgG	standard	1	B1	0.004	Several	Daily	22	Manual	22DCM	26946.5	4.4305
63	sp	Anti-human IgG	standard	1	B1	0.004	Several	Stock	22	Manual	22SCM	26676	4.42612
64	sp	Anti-human IgG	standard	1	B1	0.004	Several	Daily	22	Automatic	22DCA	26410.5	4.42178
1	sp	Anti-human IgG	standard	13	B10	2.38e-07	Stock	Daily	22	Automatic	22DSA	2338.5	3.36894
2	sp	Anti-human IgG	standard	13	B10	2.38e-07	Stock	Stock	22	Automatic	22SSA	1146	3.05918
3	sp	Anti-human IgG	standard	13	B10	2.38e-07	Stock	Stock	37	Automatic	37SSA	2845.5	3.45416
4	sp	Anti-human IgG	standard	13	B10	2.38e-07	Stock	Stock	37	Manual	37SSM	1738	3.24005
5	sp	Anti-human IgG	standard	13	B10	2.38e-07	Stock	Daily	37	Manual	37DSM	3966.5	3.59841
6	sp	Anti-human IgG	standard	13	B10	2.38e-07	Stock	Stock	22	Manual	22SSM	948.5	2.97704
7	sp	Anti-human IgG	standard	13	B10	2.38e-07	Several	Stock	37	Manual	37SCM	1440.5	3.15851
8	sp	Anti-human IgG	standard	13	B10	2.38e-07	Stock	Daily	22	Automatic	22DSA	2227.5	3.34782
9	sp	Anti-human IgG	standard	13	B10	2.38e-07	Several	Stock	37	Manual	37SCM	1451	3.16167
10	sp	Anti-human IgG	standard	13	B10	2.38e-07	Stock	Stock	22	Automatic	22SSA	2521	3.40157
11	sp	Anti-human IgG	standard	13	B10	2.38e-07	Several	Daily	22	Automatic	22DCA	1197.5	3.07828
12	sp	Anti-human IgG	standard	13	B10	2.38e-07	Several	Stock	22	Manual	22SCM	2226.5	3.34762
13	sp	Anti-human IgG	standard	13	B10	2.38e-07	Several	Daily	37	Automatic	37DCA	1678	3.22479
14	sp	Anti-human IgG	standard	13	B10	2.38e-07	Several	Daily	22	Manual	22DCM	1281	3.10755
15	sp	Anti-human IgG	standard	13	B10	2.38e-07	Several	Stock	22	Automatic	22SCA	1481.5	3.1707
16	sp	Anti-human IgG	standard	13	B10	2.38e-07	Stock	Daily	37	Automatic	37DSA	1789.5	3.25273
17	sp	Anti-human IgG	standard	13	B10	2.38e-07	Several	Daily	37	Manual	37DCM	4296.5	3.63311
18	sp	Anti-human IgG	standard	13	B10	2.38e-07	Several	Daily	22	Manual	22DCM	1967	3.2938
19	sp	Anti-human IgG	standard	13	B10	2.38e-07	Several	Stock	22	Automatic	22SCA	933	2.96988
20	sp	Anti-human IgG	standard	13	B10	2.38e-07	Several	Daily	37	Manual	37DCM	1747	3.24229
21	sp	Anti-human IgG	standard	13	B10	2.38e-07	Stock	Daily	37	Automatic	37DSA	1718.5	3.23515
22	sp	Anti-human IgG	standard	13	B10	2.38e-07	Several	Daily	37	Automatic	37DCA	1529.5	3.18455
23	sp	Anti-human IgG	standard	13	B10	2.38e-07	Stock	Stock	37	Manual	37SSM	1556.5	3.19215
24	sp	Anti-human IgG	standard	13	B10	2.38e-07	Stock	Daily	37	Manual	37DSM	1413	3.15014
25	sp	Anti-human IgG	standard	13	B10	2.38e-07	Several	Daily	22	Automatic	22DCA	1192.5	3.07646
26	sp	Anti-human IgG	standard	13	B10	2.38e-07	Stock	Daily	22	Manual	22DSM	486.5	2.68708
27	sp	Anti-human IgG	standard	13	B10	2.38e-07	Several	Daily	37	Automatic	37DCA	1312.5	3.1181
28	sp	Anti-human IgG	standard	13	B10	2.38e-07	Several	Stock	37	Automatic	37SCA	2080.5	3.31817
29	sp	Anti-human IgG	standard	13	B10	2.38e-07	Stock	Daily	22	Manual	22DSM	744.5	2.87186
30	sp	Anti-human IgG	standard	13	B10	2.38e-07	Several	Daily	22	Manual	22DCM	979.5	2.991
31	sp	Anti-human IgG	standard	13	B10	2.38e-07	Several	Stock	22	Manual	22SCM	984.5	2.99322
32	sp	Anti-human IgG	standard	13	B10	2.38e-07	Stock	Stock	37	Automatic	37SSA	1440.5	3.15851
33	sp	Anti-human IgG	standard	13	B10	2.38e-07	Stock	Stock	22	Manual	22SSM	3098.5	3.49115
34	sp	Anti-human IgG	standard	13	B10	2.38e-07	Stock	Daily	22	Automatic	22DSA	4918	3.69179
35	sp	Anti-human IgG	standard	13	B10	2.38e-07	Several	Daily	37	Manual	37DCM	5835	3.76604
36	sp	Anti-human IgG	standard	13	B10	2.38e-07	Several	Daily	22	Automatic	22DCA	4514.5	3.65461
37	sp	Anti-human IgG	standard	13	B10	2.38e-07	Stock	Stock	37	Manual	37SSM	1324	3.12189
38	sp	Anti-human IgG	standard	13	B10	2.38e-07	Stock	Stock	37	Automatic	37SSA	1209	3.08243
39	sp	Anti-human IgG	standard	13	B10	2.38e-07	Several	Stock	22	Manual	22SCM	1085	3.03543
40	sp	Anti-human IgG	standard	13	B10	2.38e-07	Stock	Stock	22	Automatic	22SSA	777	2.89042
41	sp	Anti-human IgG	standard	13	B10	2.38e-07	Several	Daily	37	Manual	37DCM	1652	3.21801
42	sp	Anti-human IgG	standard	13	B10	2.38e-07	Several	Daily	22	Automatic	22DCA	2950	3.46982
43	sp	Anti-human IgG	standard	13	B10	2.38e-07	Stock	Daily	37	Automatic	37DSA	915	2.96142
44	sp	Anti-human IgG	standard	13	B10	2.38e-07	Several	Stock	22	Automatic	22SCA	869	2.93902
45	sp	Anti-human IgG	standard	13	B10	2.38e-07	Several	Stock	22	Automatic	22SCA	742	2.8704
46	sp	Anti-human IgG	standard	13	B10	2.38e-07	Stock	Daily	37	Manual	37DSM	1357	3.13258
47	sp	Anti-human IgG	standard	13	B10	2.38e-07	Several	Stock	37	Automatic	37SCA	861	2.935
48	sp	Anti-human IgG	standard	13	B10	2.38e-07	Stock	Daily	22	Manual	22DSM	607	2.78319
49	sp	Anti-human IgG	standard	13	B10	2.38e-07	Stock	Stock	37	Automatic	37SSA	1120	3.04922
50	sp	Anti-human IgG	standard	13	B10	2.38e-07	Stock	Daily	37	Automatic	37DSA	1270	3.1038
51	sp	Anti-human IgG	standard	13	B10	2.38e-07	Several	Stock	37	Manual	37SCM	883	2.94596
52	sp	Anti-human IgG	standard	13	B10	2.38e-07	Stock	Stock	37	Manual	37SSM	1091.5	3.03802
53	sp	Anti-human IgG	standard	13	B10	2.38e-07	Several	Stock	37	Manual	37SCM	946.5	2.97612
54	sp	Anti-human IgG	standard	13	B10	2.38e-07	Stock	Stock	22	Automatic	22SSA	985	2.99344
55	sp	Anti-human IgG	standard	13	B10	2.38e-07	Stock	Daily	22	Manual	22DSM	863	2.93601
56	sp	Anti-human IgG	standard	13	B10	2.38e-07	Several	Stock	22	Manual	22SCM	564.5	2.75166
57	sp	Anti-human IgG	standard	13	B10	2.38e-07	Several	Daily	37	Automatic	37DCA	1126.5	3.05173
58	sp	Anti-human IgG	standard	13	B10	2.38e-07	Several	Daily	37	Automatic	37DCA	1169	3.06781
59	sp	Anti-human IgG	standard	13	B10	2.38e-07	Several	Daily	22	Manual	22DCM	820.5	2.91408
60	sp	Anti-human IgG	standard	13	B10	2.38e-07	Several	Daily	37	Manual	37DCM	1464.5	3.16569
61	sp	Anti-human IgG	standard	13	B10	2.38e-07	Several	Stock	37	Automatic	37SCA	949.5	2.97749
62	sp	Anti-human IgG	standard	13	B10	2.38e-07	Several	Daily	22	Manual	22DCM	2001.5	3.30136
63	sp	Anti-human IgG	standard	13	B10	2.38e-07	Several	Stock	22	Manual	22SCM	778.5	2.89126
64	sp	Anti-human IgG	standard	13	B10	2.38e-07	Several	Daily	22	Automatic	22DCA	1014	3.00604
1	sp	Anti-human IgG	standard	15	B11	4.69e-08	Stock	Daily	22	Automatic	22DSA	2112.5	3.3248
2	sp	Anti-human IgG	standard	15	B11	4.69e-08	Stock	Stock	22	Automatic	22SSA	931.5	2.96918
3	sp	Anti-human IgG	standard	15	B11	4.69e-08	Stock	Stock	37	Automatic	37SSA	3341	3.52388
4	sp	Anti-human IgG	standard	15	B11	4.69e-08	Stock	Stock	37	Manual	37SSM	1392.5	3.1438
5	sp	Anti-human IgG	standard	15	B11	4.69e-08	Stock	Daily	37	Manual	37DSM	3564	3.55194
6	sp	Anti-human IgG	standard	15	B11	4.69e-08	Stock	Stock	22	Manual	22SSM	833	2.92065
7	sp	Anti-human IgG	standard	15	B11	4.69e-08	Several	Stock	37	Manual	37SCM	1295.5	3.11244
8	sp	Anti-human IgG	standard	15	B11	4.69e-08	Stock	Daily	22	Automatic	22DSA	2236.5	3.34957
9	sp	Anti-human IgG	standard	15	B11	4.69e-08	Several	Stock	37	Manual	37SCM	1270	3.1038
10	sp	Anti-human IgG	standard	15	B11	4.69e-08	Stock	Stock	22	Automatic	22SSA	2140.5	3.33052
11	sp	Anti-human IgG	standard	15	B11	4.69e-08	Several	Daily	22	Automatic	22DCA	996	2.99826
12	sp	Anti-human IgG	standard	15	B11	4.69e-08	Several	Stock	22	Manual	22SCM	2157	3.33385
13	sp	Anti-human IgG	standard	15	B11	4.69e-08	Several	Daily	37	Automatic	37DCA	1434.5	3.1567
14	sp	Anti-human IgG	standard	15	B11	4.69e-08	Several	Daily	22	Manual	22DCM	1126.5	3.05173
15	sp	Anti-human IgG	standard	15	B11	4.69e-08	Several	Stock	22	Automatic	22SCA	1418.5	3.15183
16	sp	Anti-human IgG	standard	15	B11	4.69e-08	Stock	Daily	37	Automatic	37DSA	2334	3.3681
17	sp	Anti-human IgG	standard	15	B11	4.69e-08	Several	Daily	37	Manual	37DCM	1144.5	3.05862
18	sp	Anti-human IgG	standard	15	B11	4.69e-08	Several	Daily	22	Manual	22DCM	1933.5	3.28634
19	sp	Anti-human IgG	standard	15	B11	4.69e-08	Several	Stock	22	Automatic	22SCA	831.5	2.91986
20	sp	Anti-human IgG	standard	15	B11	4.69e-08	Several	Daily	37	Manual	37DCM	1424.5	3.15366
21	sp	Anti-human IgG	standard	15	B11	4.69e-08	Stock	Daily	37	Automatic	37DSA	1365	3.13513
22	sp	Anti-human IgG	standard	15	B11	4.69e-08	Several	Daily	37	Automatic	37DCA	1842.5	3.26541
23	sp	Anti-human IgG	standard	15	B11	4.69e-08	Stock	Stock	37	Manual	37SSM	1303.5	3.11511
24	sp	Anti-human IgG	standard	15	B11	4.69e-08	Stock	Daily	37	Manual	37DSM	1232	3.09061
25	sp	Anti-human IgG	standard	15	B11	4.69e-08	Several	Daily	22	Automatic	22DCA	1059.5	3.0251
26	sp	Anti-human IgG	standard	15	B11	4.69e-08	Stock	Daily	22	Manual	22DSM	1832.5	3.26304
27	sp	Anti-human IgG	standard	15	B11	4.69e-08	Several	Daily	37	Automatic	37DCA	1251	3.09726
28	sp	Anti-human IgG	standard	15	B11	4.69e-08	Several	Stock	37	Automatic	37SCA	1406	3.14799
29	sp	Anti-human IgG	standard	15	B11	4.69e-08	Stock	Daily	22	Manual	22DSM	660.5	2.81987
30	sp	Anti-human IgG	standard	15	B11	4.69e-08	Several	Daily	22	Manual	22DCM	876.5	2.94275
31	sp	Anti-human IgG	standard	15	B11	4.69e-08	Several	Stock	22	Manual	22SCM	779.5	2.89182
32	sp	Anti-human IgG	standard	15	B11	4.69e-08	Stock	Stock	37	Automatic	37SSA	889.5	2.94915
33	sp	Anti-human IgG	standard	15	B11	4.69e-08	Stock	Stock	22	Manual	22SSM	3157	3.49927
34	sp	Anti-human IgG	standard	15	B11	4.69e-08	Stock	Daily	22	Automatic	22DSA	4857	3.68637
35	sp	Anti-human IgG	standard	15	B11	4.69e-08	Several	Daily	37	Manual	37DCM	6025.5	3.77999
36	sp	Anti-human IgG	standard	15	B11	4.69e-08	Several	Daily	22	Automatic	22DCA	4419	3.64532
37	sp	Anti-human IgG	standard	15	B11	4.69e-08	Stock	Stock	37	Manual	37SSM	1177	3.07078
38	sp	Anti-human IgG	standard	15	B11	4.69e-08	Stock	Stock	37	Automatic	37SSA	1042	3.01787
39	sp	Anti-human IgG	standard	15	B11	4.69e-08	Several	Stock	22	Manual	22SCM	1075.5	3.03161
40	sp	Anti-human IgG	standard	15	B11	4.69e-08	Stock	Stock	22	Automatic	22SSA	747.5	2.87361
41	sp	Anti-human IgG	standard	15	B11	4.69e-08	Several	Daily	37	Manual	37DCM	1530	3.18469
42	sp	Anti-human IgG	standard	15	B11	4.69e-08	Several	Daily	22	Automatic	22DCA	2535	3.40398
43	sp	Anti-human IgG	standard	15	B11	4.69e-08	Stock	Daily	37	Automatic	37DSA	845.5	2.92711
44	sp	Anti-human IgG	standard	15	B11	4.69e-08	Several	Stock	22	Automatic	22SCA	736	2.86688
45	sp	Anti-human IgG	standard	15	B11	4.69e-08	Several	Stock	22	Automatic	22SCA	630	2.79934
46	sp	Anti-human IgG	standard	15	B11	4.69e-08	Stock	Daily	37	Manual	37DSM	720.5	2.85763
47	sp	Anti-human IgG	standard	15	B11	4.69e-08	Several	Stock	37	Automatic	37SCA	772	2.88762
48	sp	Anti-human IgG	standard	15	B11	4.69e-08	Stock	Daily	22	Manual	22DSM	547.5	2.73838
49	sp	Anti-human IgG	standard	15	B11	4.69e-08	Stock	Stock	37	Automatic	37SSA	971	2.98722
50	sp	Anti-human IgG	standard	15	B11	4.69e-08	Stock	Daily	37	Automatic	37DSA	1036	3.01536
51	sp	Anti-human IgG	standard	15	B11	4.69e-08	Several	Stock	37	Manual	37SCM	790.5	2.8979
52	sp	Anti-human IgG	standard	15	B11	4.69e-08	Stock	Stock	37	Manual	37SSM	824	2.91593
53	sp	Anti-human IgG	standard	15	B11	4.69e-08	Several	Stock	37	Manual	37SCM	772	2.88762
54	sp	Anti-human IgG	standard	15	B11	4.69e-08	Stock	Stock	22	Automatic	22SSA	1037.5	3.01599
55	sp	Anti-human IgG	standard	15	B11	4.69e-08	Stock	Daily	22	Manual	22DSM	601.5	2.77924
56	sp	Anti-human IgG	standard	15	B11	4.69e-08	Several	Stock	22	Manual	22SCM	606.5	2.78283
57	sp	Anti-human IgG	standard	15	B11	4.69e-08	Several	Daily	37	Automatic	37DCA	910	2.95904
58	sp	Anti-human IgG	standard	15	B11	4.69e-08	Several	Daily	37	Automatic	37DCA	980.5	2.99145
59	sp	Anti-human IgG	standard	15	B11	4.69e-08	Several	Daily	22	Manual	22DCM	698	2.84386
60	sp	Anti-human IgG	standard	15	B11	4.69e-08	Several	Daily	37	Manual	37DCM	1267	3.10278
61	sp	Anti-human IgG	standard	15	B11	4.69e-08	Several	Stock	37	Automatic	37SCA	867	2.93802
62	sp	Anti-human IgG	standard	15	B11	4.69e-08	Several	Daily	22	Manual	22DCM	646.5	2.81057
63	sp	Anti-human IgG	standard	15	B11	4.69e-08	Several	Stock	22	Manual	22SCM	717.5	2.85582
64	sp	Anti-human IgG	standard	15	B11	4.69e-08	Several	Daily	22	Automatic	22DCA	910.5	2.95928
1	sp	Anti-human IgG	standard	16	B12	2.09e-08	Stock	Daily	22	Automatic	22DSA	1985	3.29776
2	sp	Anti-human IgG	standard	16	B12	2.09e-08	Stock	Stock	22	Automatic	22SSA	865.5	2.93727
3	sp	Anti-human IgG	standard	16	B12	2.09e-08	Stock	Stock	37	Automatic	37SSA	10469.5	4.01993
4	sp	Anti-human IgG	standard	16	B12	2.09e-08	Stock	Stock	37	Manual	37SSM	1512.5	3.1797
5	sp	Anti-human IgG	standard	16	B12	2.09e-08	Stock	Daily	37	Manual	37DSM	3393.5	3.53065
6	sp	Anti-human IgG	standard	16	B12	2.09e-08	Stock	Stock	22	Manual	22SSM	843.5	2.92609
7	sp	Anti-human IgG	standard	16	B12	2.09e-08	Several	Stock	37	Manual	37SCM	1494.5	3.1745
8	sp	Anti-human IgG	standard	16	B12	2.09e-08	Stock	Daily	22	Automatic	22DSA	1900.5	3.27887
9	sp	Anti-human IgG	standard	16	B12	2.09e-08	Several	Stock	37	Manual	37SCM	1272	3.10449
10	sp	Anti-human IgG	standard	16	B12	2.09e-08	Stock	Stock	22	Automatic	22SSA	2337.5	3.36875
11	sp	Anti-human IgG	standard	16	B12	2.09e-08	Several	Daily	22	Automatic	22DCA	1048.5	3.02057
12	sp	Anti-human IgG	standard	16	B12	2.09e-08	Several	Stock	22	Manual	22SCM	2120.5	3.32644
13	sp	Anti-human IgG	standard	16	B12	2.09e-08	Several	Daily	37	Automatic	37DCA	1334	3.12516
14	sp	Anti-human IgG	standard	16	B12	2.09e-08	Several	Daily	22	Manual	22DCM	1111	3.04571
15	sp	Anti-human IgG	standard	16	B12	2.09e-08	Several	Stock	22	Automatic	22SCA	1372.5	3.13751
16	sp	Anti-human IgG	standard	16	B12	2.09e-08	Stock	Daily	37	Automatic	37DSA	1757.5	3.2449
17	sp	Anti-human IgG	standard	16	B12	2.09e-08	Several	Daily	37	Manual	37DCM	1109	3.04493
18	sp	Anti-human IgG	standard	16	B12	2.09e-08	Several	Daily	22	Manual	22DCM	1874	3.27277
19	sp	Anti-human IgG	standard	16	B12	2.09e-08	Several	Stock	22	Automatic	22SCA	858	2.93349
20	sp	Anti-human IgG	standard	16	B12	2.09e-08	Several	Daily	37	Manual	37DCM	1362	3.13418
21	sp	Anti-human IgG	standard	16	B12	2.09e-08	Stock	Daily	37	Automatic	37DSA	1298	3.11327
22	sp	Anti-human IgG	standard	16	B12	2.09e-08	Several	Daily	37	Automatic	37DCA	1384	3.14114
23	sp	Anti-human IgG	standard	16	B12	2.09e-08	Stock	Stock	37	Manual	37SSM	1260	3.10037
24	sp	Anti-human IgG	standard	16	B12	2.09e-08	Stock	Daily	37	Manual	37DSM	1744	3.24155
25	sp	Anti-human IgG	standard	16	B12	2.09e-08	Several	Daily	22	Automatic	22DCA	983	2.99255
26	sp	Anti-human IgG	standard	16	B12	2.09e-08	Stock	Daily	22	Manual	22DSM	469	2.67117
27	sp	Anti-human IgG	standard	16	B12	2.09e-08	Several	Daily	37	Automatic	37DCA	1103	3.04258
28	sp	Anti-human IgG	standard	16	B12	2.09e-08	Several	Stock	37	Automatic	37SCA	1371.5	3.1372
29	sp	Anti-human IgG	standard	16	B12	2.09e-08	Stock	Daily	22	Manual	22DSM	616.5	2.78993
30	sp	Anti-human IgG	standard	16	B12	2.09e-08	Several	Daily	22	Manual	22DCM	930	2.96848
31	sp	Anti-human IgG	standard	16	B12	2.09e-08	Several	Stock	22	Manual	22SCM	843.5	2.92609
32	sp	Anti-human IgG	standard	16	B12	2.09e-08	Stock	Stock	37	Automatic	37SSA	916	2.9619
33	sp	Anti-human IgG	standard	16	B12	2.09e-08	Stock	Stock	22	Manual	22SSM	3200.5	3.50522
34	sp	Anti-human IgG	standard	16	B12	2.09e-08	Stock	Daily	22	Automatic	22DSA	4691	3.67127
35	sp	Anti-human IgG	standard	16	B12	2.09e-08	Several	Daily	37	Manual	37DCM	5487	3.73933
36	sp	Anti-human IgG	standard	16	B12	2.09e-08	Several	Daily	22	Automatic	22DCA	4500.5	3.65326
37	sp	Anti-human IgG	standard	16	B12	2.09e-08	Stock	Stock	37	Manual	37SSM	1033	3.0141
38	sp	Anti-human IgG	standard	16	B12	2.09e-08	Stock	Stock	37	Automatic	37SSA	1154	3.06221
39	sp	Anti-human IgG	standard	16	B12	2.09e-08	Several	Stock	22	Manual	22SCM	1041.5	3.01766
40	sp	Anti-human IgG	standard	16	B12	2.09e-08	Stock	Stock	22	Automatic	22SSA	676	2.82995
41	sp	Anti-human IgG	standard	16	B12	2.09e-08	Several	Daily	37	Manual	37DCM	1519	3.18156
42	sp	Anti-human IgG	standard	16	B12	2.09e-08	Several	Daily	22	Automatic	22DCA	2735	3.43696
43	sp	Anti-human IgG	standard	16	B12	2.09e-08	Stock	Daily	37	Automatic	37DSA	828.5	2.91829
44	sp	Anti-human IgG	standard	16	B12	2.09e-08	Several	Stock	22	Automatic	22SCA	738.5	2.86835
45	sp	Anti-human IgG	standard	16	B12	2.09e-08	Several	Stock	22	Automatic	22SCA	642	2.80754
46	sp	Anti-human IgG	standard	16	B12	2.09e-08	Stock	Daily	37	Manual	37DSM	686.5	2.83664
47	sp	Anti-human IgG	standard	16	B12	2.09e-08	Several	Stock	37	Automatic	37SCA	742	2.8704
48	sp	Anti-human IgG	standard	16	B12	2.09e-08	Stock	Daily	22	Manual	22DSM	519.5	2.71559
49	sp	Anti-human IgG	standard	16	B12	2.09e-08	Stock	Stock	37	Automatic	37SSA	977.5	2.99012
50	sp	Anti-human IgG	standard	16	B12	2.09e-08	Stock	Daily	37	Automatic	37DSA	1259	3.10003
51	sp	Anti-human IgG	standard	16	B12	2.09e-08	Several	Stock	37	Manual	37SCM	811.5	2.90929
52	sp	Anti-human IgG	standard	16	B12	2.09e-08	Stock	Stock	37	Manual	37SSM	792	2.89873
53	sp	Anti-human IgG	standard	16	B12	2.09e-08	Several	Stock	37	Manual	37SCM	725	2.86034
54	sp	Anti-human IgG	standard	16	B12	2.09e-08	Stock	Stock	22	Automatic	22SSA	973	2.98811
55	sp	Anti-human IgG	standard	16	B12	2.09e-08	Stock	Daily	22	Manual	22DSM	636	2.80346
56	sp	Anti-human IgG	standard	16	B12	2.09e-08	Several	Stock	22	Manual	22SCM	597	2.77597
57	sp	Anti-human IgG	standard	16	B12	2.09e-08	Several	Daily	37	Automatic	37DCA	892.5	2.95061
58	sp	Anti-human IgG	standard	16	B12	2.09e-08	Several	Daily	37	Automatic	37DCA	947.5	2.97658
59	sp	Anti-human IgG	standard	16	B12	2.09e-08	Several	Daily	22	Manual	22DCM	740	2.86923
60	sp	Anti-human IgG	standard	16	B12	2.09e-08	Several	Daily	37	Manual	37DCM	1111.5	3.04591
61	sp	Anti-human IgG	standard	16	B12	2.09e-08	Several	Stock	37	Automatic	37SCA	763.5	2.88281
62	sp	Anti-human IgG	standard	16	B12	2.09e-08	Several	Daily	22	Manual	22DCM	564	2.75128
63	sp	Anti-human IgG	standard	16	B12	2.09e-08	Several	Stock	22	Manual	22SCM	637.5	2.80448
64	sp	Anti-human IgG	standard	16	B12	2.09e-08	Several	Daily	22	Automatic	22DCA	840.5	2.92454
1	sp	Anti-human IgG	standard	3	B2	0.000790123	Stock	Daily	22	Automatic	22DSA	24004.5	4.38029
2	sp	Anti-human IgG	standard	3	B2	0.000790123	Stock	Stock	22	Automatic	22SSA	24977	4.39754
3	sp	Anti-human IgG	standard	3	B2	0.000790123	Stock	Stock	37	Automatic	37SSA	26443	4.42231
4	sp	Anti-human IgG	standard	3	B2	0.000790123	Stock	Stock	37	Manual	37SSM	29909.5	4.47581
5	sp	Anti-human IgG	standard	3	B2	0.000790123	Stock	Daily	37	Manual	37DSM	30108	4.47868
6	sp	Anti-human IgG	standard	3	B2	0.000790123	Stock	Stock	22	Manual	22SSM	26166.5	4.41775
7	sp	Anti-human IgG	standard	3	B2	0.000790123	Several	Stock	37	Manual	37SCM	30479	4.484
8	sp	Anti-human IgG	standard	3	B2	0.000790123	Stock	Daily	22	Automatic	22DSA	28165.5	4.44972
9	sp	Anti-human IgG	standard	3	B2	0.000790123	Several	Stock	37	Manual	37SCM	29334	4.46737
10	sp	Anti-human IgG	standard	3	B2	0.000790123	Stock	Stock	22	Automatic	22SSA	29684	4.47252
11	sp	Anti-human IgG	standard	3	B2	0.000790123	Several	Daily	22	Automatic	22DCA	28931.5	4.46137
12	sp	Anti-human IgG	standard	3	B2	0.000790123	Several	Stock	22	Manual	22SCM	26702	4.42654
13	sp	Anti-human IgG	standard	3	B2	0.000790123	Several	Daily	37	Automatic	37DCA	27361	4.43713
14	sp	Anti-human IgG	standard	3	B2	0.000790123	Several	Daily	22	Manual	22DCM	29490.5	4.46968
15	sp	Anti-human IgG	standard	3	B2	0.000790123	Several	Stock	22	Automatic	22SCA	27422	4.4381
16	sp	Anti-human IgG	standard	3	B2	0.000790123	Stock	Daily	37	Automatic	37DSA	30203.5	4.48006
17	sp	Anti-human IgG	standard	3	B2	0.000790123	Several	Daily	37	Manual	37DCM	29427	4.46875
18	sp	Anti-human IgG	standard	3	B2	0.000790123	Several	Daily	22	Manual	22DCM	26185	4.41805
19	sp	Anti-human IgG	standard	3	B2	0.000790123	Several	Stock	22	Automatic	22SCA	26250.5	4.41914
20	sp	Anti-human IgG	standard	3	B2	0.000790123	Several	Daily	37	Manual	37DCM	28579.5	4.45605
21	sp	Anti-human IgG	standard	3	B2	0.000790123	Stock	Daily	37	Automatic	37DSA	28957	4.46175
22	sp	Anti-human IgG	standard	3	B2	0.000790123	Several	Daily	37	Automatic	37DCA	25741.5	4.41063
23	sp	Anti-human IgG	standard	3	B2	0.000790123	Stock	Stock	37	Manual	37SSM	30405.5	4.48295
24	sp	Anti-human IgG	standard	3	B2	0.000790123	Stock	Daily	37	Manual	37DSM	30245	4.48065
25	sp	Anti-human IgG	standard	3	B2	0.000790123	Several	Daily	22	Automatic	22DCA	28172.5	4.44983
26	sp	Anti-human IgG	standard	3	B2	0.000790123	Stock	Daily	22	Manual	22DSM	23918.5	4.37873
27	sp	Anti-human IgG	standard	3	B2	0.000790123	Several	Daily	37	Automatic	37DCA	29054	4.46321
28	sp	Anti-human IgG	standard	3	B2	0.000790123	Several	Stock	37	Automatic	37SCA	30195.5	4.47994
29	sp	Anti-human IgG	standard	3	B2	0.000790123	Stock	Daily	22	Manual	22DSM	26631	4.42539
30	sp	Anti-human IgG	standard	3	B2	0.000790123	Several	Daily	22	Manual	22DCM	24205	4.38391
31	sp	Anti-human IgG	standard	3	B2	0.000790123	Several	Stock	22	Manual	22SCM	24048	4.38108
32	sp	Anti-human IgG	standard	3	B2	0.000790123	Stock	Stock	37	Automatic	37SSA	23884	4.37811
33	sp	Anti-human IgG	standard	3	B2	0.000790123	Stock	Stock	22	Manual	22SSM	26542.5	4.42394
34	sp	Anti-human IgG	standard	3	B2	0.000790123	Stock	Daily	22	Automatic	22DSA	24202	4.38385
35	sp	Anti-human IgG	standard	3	B2	0.000790123	Several	Daily	37	Manual	37DCM	31156	4.49354
36	sp	Anti-human IgG	standard	3	B2	0.000790123	Several	Daily	22	Automatic	22DCA	30072.5	4.47817
37	sp	Anti-human IgG	standard	3	B2	0.000790123	Stock	Stock	37	Manual	37SSM	32369	4.51013
38	sp	Anti-human IgG	standard	3	B2	0.000790123	Stock	Stock	37	Automatic	37SSA	31713	4.50124
39	sp	Anti-human IgG	standard	3	B2	0.000790123	Several	Stock	22	Manual	22SCM	31842	4.503
40	sp	Anti-human IgG	standard	3	B2	0.000790123	Stock	Stock	22	Automatic	22SSA	30330	4.48187
41	sp	Anti-human IgG	standard	3	B2	0.000790123	Several	Daily	37	Manual	37DCM	32426	4.51089
42	sp	Anti-human IgG	standard	3	B2	0.000790123	Several	Daily	22	Automatic	22DCA	31100.5	4.49277
43	sp	Anti-human IgG	standard	3	B2	0.000790123	Stock	Daily	37	Automatic	37DSA	31085.5	4.49256
44	sp	Anti-human IgG	standard	3	B2	0.000790123	Several	Stock	22	Automatic	22SCA	29791	4.47409
45	sp	Anti-human IgG	standard	3	B2	0.000790123	Several	Stock	22	Automatic	22SCA	32035	4.50562
46	sp	Anti-human IgG	standard	3	B2	0.000790123	Stock	Daily	37	Manual	37DSM	30420.5	4.48317
47	sp	Anti-human IgG	standard	3	B2	0.000790123	Several	Stock	37	Automatic	37SCA	30805.5	4.48863
48	sp	Anti-human IgG	standard	3	B2	0.000790123	Stock	Daily	22	Manual	22DSM	28173	4.44983
49	sp	Anti-human IgG	standard	3	B2	0.000790123	Stock	Stock	37	Automatic	37SSA	28440.5	4.45394
50	sp	Anti-human IgG	standard	3	B2	0.000790123	Stock	Daily	37	Automatic	37DSA	29871	4.47525
51	sp	Anti-human IgG	standard	3	B2	0.000790123	Several	Stock	37	Manual	37SCM	29251	4.46614
52	sp	Anti-human IgG	standard	3	B2	0.000790123	Stock	Stock	37	Manual	37SSM	31335.5	4.49604
53	sp	Anti-human IgG	standard	3	B2	0.000790123	Several	Stock	37	Manual	37SCM	28680.5	4.45759
54	sp	Anti-human IgG	standard	3	B2	0.000790123	Stock	Stock	22	Automatic	22SSA	27919	4.4459
55	sp	Anti-human IgG	standard	3	B2	0.000790123	Stock	Daily	22	Manual	22DSM	26639	4.42552
56	sp	Anti-human IgG	standard	3	B2	0.000790123	Several	Stock	22	Manual	22SCM	24426	4.38785
57	sp	Anti-human IgG	standard	3	B2	0.000790123	Several	Daily	37	Automatic	37DCA	29938.5	4.47623
58	sp	Anti-human IgG	standard	3	B2	0.000790123	Several	Daily	37	Automatic	37DCA	26694.5	4.42642
59	sp	Anti-human IgG	standard	3	B2	0.000790123	Several	Daily	22	Manual	22DCM	27541	4.43998
60	sp	Anti-human IgG	standard	3	B2	0.000790123	Several	Daily	37	Manual	37DCM	28184	4.45
61	sp	Anti-human IgG	standard	3	B2	0.000790123	Several	Stock	37	Automatic	37SCA	27574	4.4405
62	sp	Anti-human IgG	standard	3	B2	0.000790123	Several	Daily	22	Manual	22DCM	26034.5	4.41555
63	sp	Anti-human IgG	standard	3	B2	0.000790123	Several	Stock	22	Manual	22SCM	26323	4.42034
64	sp	Anti-human IgG	standard	3	B2	0.000790123	Several	Daily	22	Automatic	22DCA	26455	4.42251
1	sp	Anti-human IgG	standard	4	B3	0.000351166	Stock	Daily	22	Automatic	22DSA	24511.5	4.38937
2	sp	Anti-human IgG	standard	4	B3	0.000351166	Stock	Stock	22	Automatic	22SSA	24380.5	4.38704
3	sp	Anti-human IgG	standard	4	B3	0.000351166	Stock	Stock	37	Automatic	37SSA	26187	4.41809
4	sp	Anti-human IgG	standard	4	B3	0.000351166	Stock	Stock	37	Manual	37SSM	29783	4.47397
5	sp	Anti-human IgG	standard	4	B3	0.000351166	Stock	Daily	37	Manual	37DSM	30254	4.48078
6	sp	Anti-human IgG	standard	4	B3	0.000351166	Stock	Stock	22	Manual	22SSM	25203.5	4.40146
7	sp	Anti-human IgG	standard	4	B3	0.000351166	Several	Stock	37	Manual	37SCM	30024.5	4.47748
8	sp	Anti-human IgG	standard	4	B3	0.000351166	Stock	Daily	22	Automatic	22DSA	27565	4.44036
9	sp	Anti-human IgG	standard	4	B3	0.000351166	Several	Stock	37	Manual	37SCM	28720	4.45818
10	sp	Anti-human IgG	standard	4	B3	0.000351166	Stock	Stock	22	Automatic	22SSA	29054.5	4.46321
11	sp	Anti-human IgG	standard	4	B3	0.000351166	Several	Daily	22	Automatic	22DCA	27970.5	4.4467
12	sp	Anti-human IgG	standard	4	B3	0.000351166	Several	Stock	22	Manual	22SCM	25719	4.41025
13	sp	Anti-human IgG	standard	4	B3	0.000351166	Several	Daily	37	Automatic	37DCA	28178.5	4.44992
14	sp	Anti-human IgG	standard	4	B3	0.000351166	Several	Daily	22	Manual	22DCM	28510.5	4.455
15	sp	Anti-human IgG	standard	4	B3	0.000351166	Several	Stock	22	Automatic	22SCA	26951	4.43057
16	sp	Anti-human IgG	standard	4	B3	0.000351166	Stock	Daily	37	Automatic	37DSA	29537.5	4.47037
17	sp	Anti-human IgG	standard	4	B3	0.000351166	Several	Daily	37	Manual	37DCM	29212	4.46556
18	sp	Anti-human IgG	standard	4	B3	0.000351166	Several	Daily	22	Manual	22DCM	25637.5	4.40888
19	sp	Anti-human IgG	standard	4	B3	0.000351166	Several	Stock	22	Automatic	22SCA	25708	4.41007
20	sp	Anti-human IgG	standard	4	B3	0.000351166	Several	Daily	37	Manual	37DCM	27806.5	4.44415
21	sp	Anti-human IgG	standard	4	B3	0.000351166	Stock	Daily	37	Automatic	37DSA	29215.5	4.46561
22	sp	Anti-human IgG	standard	4	B3	0.000351166	Several	Daily	37	Automatic	37DCA	24852	4.39536
23	sp	Anti-human IgG	standard	4	B3	0.000351166	Stock	Stock	37	Manual	37SSM	29790	4.47407
24	sp	Anti-human IgG	standard	4	B3	0.000351166	Stock	Daily	37	Manual	37DSM	30400.5	4.48288
25	sp	Anti-human IgG	standard	4	B3	0.000351166	Several	Daily	22	Automatic	22DCA	28056	4.44803
26	sp	Anti-human IgG	standard	4	B3	0.000351166	Stock	Daily	22	Manual	22DSM	23872.5	4.3779
27	sp	Anti-human IgG	standard	4	B3	0.000351166	Several	Daily	37	Automatic	37DCA	28532.5	4.45534
28	sp	Anti-human IgG	standard	4	B3	0.000351166	Several	Stock	37	Automatic	37SCA	30045	4.47777
29	sp	Anti-human IgG	standard	4	B3	0.000351166	Stock	Daily	22	Manual	22DSM	26115	4.41689
30	sp	Anti-human IgG	standard	4	B3	0.000351166	Several	Daily	22	Manual	22DCM	24158	4.38306
31	sp	Anti-human IgG	standard	4	B3	0.000351166	Several	Stock	22	Manual	22SCM	24316.5	4.3859
32	sp	Anti-human IgG	standard	4	B3	0.000351166	Stock	Stock	37	Automatic	37SSA	23584.5	4.37263
33	sp	Anti-human IgG	standard	4	B3	0.000351166	Stock	Stock	22	Manual	22SSM	24946.5	4.39701
34	sp	Anti-human IgG	standard	4	B3	0.000351166	Stock	Daily	22	Automatic	22DSA	24764.5	4.39383
35	sp	Anti-human IgG	standard	4	B3	0.000351166	Several	Daily	37	Manual	37DCM	30305.5	4.48152
36	sp	Anti-human IgG	standard	4	B3	0.000351166	Several	Daily	22	Automatic	22DCA	29953	4.47644
37	sp	Anti-human IgG	standard	4	B3	0.000351166	Stock	Stock	37	Manual	37SSM	32055.5	4.5059
38	sp	Anti-human IgG	standard	4	B3	0.000351166	Stock	Stock	37	Automatic	37SSA	31813.5	4.50261
39	sp	Anti-human IgG	standard	4	B3	0.000351166	Several	Stock	22	Manual	22SCM	31590.5	4.49956
40	sp	Anti-human IgG	standard	4	B3	0.000351166	Stock	Stock	22	Automatic	22SSA	29366	4.46784
41	sp	Anti-human IgG	standard	4	B3	0.000351166	Several	Daily	37	Manual	37DCM	32289.5	4.50906
42	sp	Anti-human IgG	standard	4	B3	0.000351166	Several	Daily	22	Automatic	22DCA	30888	4.48979
43	sp	Anti-human IgG	standard	4	B3	0.000351166	Stock	Daily	37	Automatic	37DSA	30507.5	4.48441
44	sp	Anti-human IgG	standard	4	B3	0.000351166	Several	Stock	22	Automatic	22SCA	28926	4.46129
45	sp	Anti-human IgG	standard	4	B3	0.000351166	Several	Stock	22	Automatic	22SCA	31487	4.49813
46	sp	Anti-human IgG	standard	4	B3	0.000351166	Stock	Daily	37	Manual	37DSM	29807.5	4.47433
47	sp	Anti-human IgG	standard	4	B3	0.000351166	Several	Stock	37	Automatic	37SCA	30285	4.48123
48	sp	Anti-human IgG	standard	4	B3	0.000351166	Stock	Daily	22	Manual	22DSM	26723	4.42689
49	sp	Anti-human IgG	standard	4	B3	0.000351166	Stock	Stock	37	Automatic	37SSA	27981	4.44686
50	sp	Anti-human IgG	standard	4	B3	0.000351166	Stock	Daily	37	Automatic	37DSA	28972	4.46198
51	sp	Anti-human IgG	standard	4	B3	0.000351166	Several	Stock	37	Manual	37SCM	28158.5	4.44961
52	sp	Anti-human IgG	standard	4	B3	0.000351166	Stock	Stock	37	Manual	37SSM	30810	4.48869
53	sp	Anti-human IgG	standard	4	B3	0.000351166	Several	Stock	37	Manual	37SCM	27856.5	4.44493
54	sp	Anti-human IgG	standard	4	B3	0.000351166	Stock	Stock	22	Automatic	22SSA	24507	4.38929
55	sp	Anti-human IgG	standard	4	B3	0.000351166	Stock	Daily	22	Manual	22DSM	24617	4.39124
56	sp	Anti-human IgG	standard	4	B3	0.000351166	Several	Stock	22	Manual	22SCM	18319	4.2629
57	sp	Anti-human IgG	standard	4	B3	0.000351166	Several	Daily	37	Automatic	37DCA	29283.5	4.46662
58	sp	Anti-human IgG	standard	4	B3	0.000351166	Several	Daily	37	Automatic	37DCA	26525.5	4.42366
59	sp	Anti-human IgG	standard	4	B3	0.000351166	Several	Daily	22	Manual	22DCM	26948.5	4.43053
60	sp	Anti-human IgG	standard	4	B3	0.000351166	Several	Daily	37	Manual	37DCM	27533.5	4.43986
61	sp	Anti-human IgG	standard	4	B3	0.000351166	Several	Stock	37	Automatic	37SCA	27136.5	4.43355
62	sp	Anti-human IgG	standard	4	B3	0.000351166	Several	Daily	22	Manual	22DCM	25334.5	4.40371
63	sp	Anti-human IgG	standard	4	B3	0.000351166	Several	Stock	22	Manual	22SCM	25463	4.40591
64	sp	Anti-human IgG	standard	4	B3	0.000351166	Several	Daily	22	Automatic	22DCA	25184	4.40112
1	sp	Anti-human IgG	standard	5	B4	0.000156074	Stock	Daily	22	Automatic	22DSA	24491.5	4.38902
2	sp	Anti-human IgG	standard	5	B4	0.000156074	Stock	Stock	22	Automatic	22SSA	24448	4.38824
3	sp	Anti-human IgG	standard	5	B4	0.000156074	Stock	Stock	37	Automatic	37SSA	24665	4.39208
4	sp	Anti-human IgG	standard	5	B4	0.000156074	Stock	Stock	37	Manual	37SSM	28851.5	4.46017
5	sp	Anti-human IgG	standard	5	B4	0.000156074	Stock	Daily	37	Manual	37DSM	29096.5	4.46384
6	sp	Anti-human IgG	standard	5	B4	0.000156074	Stock	Stock	22	Manual	22SSM	24157.5	4.38305
7	sp	Anti-human IgG	standard	5	B4	0.000156074	Several	Stock	37	Manual	37SCM	29424	4.4687
8	sp	Anti-human IgG	standard	5	B4	0.000156074	Stock	Daily	22	Automatic	22DSA	26778	4.42778
9	sp	Anti-human IgG	standard	5	B4	0.000156074	Several	Stock	37	Manual	37SCM	27712.5	4.44268
10	sp	Anti-human IgG	standard	5	B4	0.000156074	Stock	Stock	22	Automatic	22SSA	28108	4.44883
11	sp	Anti-human IgG	standard	5	B4	0.000156074	Several	Daily	22	Automatic	22DCA	25634.5	4.40882
12	sp	Anti-human IgG	standard	5	B4	0.000156074	Several	Stock	22	Manual	22SCM	24446	4.38821
13	sp	Anti-human IgG	standard	5	B4	0.000156074	Several	Daily	37	Automatic	37DCA	26806.5	4.42824
14	sp	Anti-human IgG	standard	5	B4	0.000156074	Several	Daily	22	Manual	22DCM	26371.5	4.42113
15	sp	Anti-human IgG	standard	5	B4	0.000156074	Several	Stock	22	Automatic	22SCA	26660	4.42586
16	sp	Anti-human IgG	standard	5	B4	0.000156074	Stock	Daily	37	Automatic	37DSA	28186	4.45003
17	sp	Anti-human IgG	standard	5	B4	0.000156074	Several	Daily	37	Manual	37DCM	27711.5	4.44266
18	sp	Anti-human IgG	standard	5	B4	0.000156074	Several	Daily	22	Manual	22DCM	24441	4.38812
19	sp	Anti-human IgG	standard	5	B4	0.000156074	Several	Stock	22	Automatic	22SCA	24724	4.39312
20	sp	Anti-human IgG	standard	5	B4	0.000156074	Several	Daily	37	Manual	37DCM	27079	4.43263
21	sp	Anti-human IgG	standard	5	B4	0.000156074	Stock	Daily	37	Automatic	37DSA	24256.5	4.38483
22	sp	Anti-human IgG	standard	5	B4	0.000156074	Several	Daily	37	Automatic	37DCA	24604.5	4.39101
23	sp	Anti-human IgG	standard	5	B4	0.000156074	Stock	Stock	37	Manual	37SSM	28389	4.45315
24	sp	Anti-human IgG	standard	5	B4	0.000156074	Stock	Daily	37	Manual	37DSM	29000	4.4624
25	sp	Anti-human IgG	standard	5	B4	0.000156074	Several	Daily	22	Automatic	22DCA	26976	4.43098
26	sp	Anti-human IgG	standard	5	B4	0.000156074	Stock	Daily	22	Manual	22DSM	20228	4.30595
27	sp	Anti-human IgG	standard	5	B4	0.000156074	Several	Daily	37	Automatic	37DCA	26964.5	4.43079
28	sp	Anti-human IgG	standard	5	B4	0.000156074	Several	Stock	37	Automatic	37SCA	28872.5	4.46048
29	sp	Anti-human IgG	standard	5	B4	0.000156074	Stock	Daily	22	Manual	22DSM	24451	4.3883
30	sp	Anti-human IgG	standard	5	B4	0.000156074	Several	Daily	22	Manual	22DCM	23969.5	4.37966
31	sp	Anti-human IgG	standard	5	B4	0.000156074	Several	Stock	22	Manual	22SCM	24400.5	4.3874
32	sp	Anti-human IgG	standard	5	B4	0.000156074	Stock	Stock	37	Automatic	37SSA	24232.5	4.3844
33	sp	Anti-human IgG	standard	5	B4	0.000156074	Stock	Stock	22	Manual	22SSM	23685.5	4.37448
34	sp	Anti-human IgG	standard	5	B4	0.000156074	Stock	Daily	22	Automatic	22DSA	24216	4.3841
35	sp	Anti-human IgG	standard	5	B4	0.000156074	Several	Daily	37	Manual	37DCM	29615.5	4.47152
36	sp	Anti-human IgG	standard	5	B4	0.000156074	Several	Daily	22	Automatic	22DCA	28387	4.45312
37	sp	Anti-human IgG	standard	5	B4	0.000156074	Stock	Stock	37	Manual	37SSM	31696	4.501
38	sp	Anti-human IgG	standard	5	B4	0.000156074	Stock	Stock	37	Automatic	37SSA	31330.5	4.49597
39	sp	Anti-human IgG	standard	5	B4	0.000156074	Several	Stock	22	Manual	22SCM	30107	4.47867
40	sp	Anti-human IgG	standard	5	B4	0.000156074	Stock	Stock	22	Automatic	22SSA	27662.5	4.44189
41	sp	Anti-human IgG	standard	5	B4	0.000156074	Several	Daily	37	Manual	37DCM	31079.5	4.49247
42	sp	Anti-human IgG	standard	5	B4	0.000156074	Several	Daily	22	Automatic	22DCA	30006	4.47721
43	sp	Anti-human IgG	standard	5	B4	0.000156074	Stock	Daily	37	Automatic	37DSA	29475.5	4.46946
44	sp	Anti-human IgG	standard	5	B4	0.000156074	Several	Stock	22	Automatic	22SCA	26818.5	4.42843
45	sp	Anti-human IgG	standard	5	B4	0.000156074	Several	Stock	22	Automatic	22SCA	29783	4.47397
46	sp	Anti-human IgG	standard	5	B4	0.000156074	Stock	Daily	37	Manual	37DSM	28600	4.45637
47	sp	Anti-human IgG	standard	5	B4	0.000156074	Several	Stock	37	Automatic	37SCA	28595	4.45629
48	sp	Anti-human IgG	standard	5	B4	0.000156074	Stock	Daily	22	Manual	22DSM	23718	4.37508
49	sp	Anti-human IgG	standard	5	B4	0.000156074	Stock	Stock	37	Automatic	37SSA	27132.5	4.43349
50	sp	Anti-human IgG	standard	5	B4	0.000156074	Stock	Daily	37	Automatic	37DSA	28610.5	4.45653
51	sp	Anti-human IgG	standard	5	B4	0.000156074	Several	Stock	37	Manual	37SCM	27437	4.43834
52	sp	Anti-human IgG	standard	5	B4	0.000156074	Stock	Stock	37	Manual	37SSM	30752	4.48787
53	sp	Anti-human IgG	standard	5	B4	0.000156074	Several	Stock	37	Manual	37SCM	26355	4.42086
54	sp	Anti-human IgG	standard	5	B4	0.000156074	Stock	Stock	22	Automatic	22SSA	23247.5	4.36638
55	sp	Anti-human IgG	standard	5	B4	0.000156074	Stock	Daily	22	Manual	22DSM	24674	4.39224
56	sp	Anti-human IgG	standard	5	B4	0.000156074	Several	Stock	22	Manual	22SCM	10062.5	4.00271
57	sp	Anti-human IgG	standard	5	B4	0.000156074	Several	Daily	37	Automatic	37DCA	27550.5	4.44013
58	sp	Anti-human IgG	standard	5	B4	0.000156074	Several	Daily	37	Automatic	37DCA	25481.5	4.40622
59	sp	Anti-human IgG	standard	5	B4	0.000156074	Several	Daily	22	Manual	22DCM	25472	4.40606
60	sp	Anti-human IgG	standard	5	B4	0.000156074	Several	Daily	37	Manual	37DCM	26249.5	4.41912
61	sp	Anti-human IgG	standard	5	B4	0.000156074	Several	Stock	37	Automatic	37SCA	25488.5	4.40634
62	sp	Anti-human IgG	standard	5	B4	0.000156074	Several	Daily	22	Manual	22DCM	24393.5	4.38727
63	sp	Anti-human IgG	standard	5	B4	0.000156074	Several	Stock	22	Manual	22SCM	24422.5	4.38779
64	sp	Anti-human IgG	standard	5	B4	0.000156074	Several	Daily	22	Automatic	22DCA	24249.5	4.3847
1	sp	Anti-human IgG	standard	7	B5	3.08e-05	Stock	Daily	22	Automatic	22DSA	12694.5	4.10362
2	sp	Anti-human IgG	standard	7	B5	3.08e-05	Stock	Stock	22	Automatic	22SSA	18597	4.26944
3	sp	Anti-human IgG	standard	7	B5	3.08e-05	Stock	Stock	37	Automatic	37SSA	21763.5	4.33773
4	sp	Anti-human IgG	standard	7	B5	3.08e-05	Stock	Stock	37	Manual	37SSM	23453.5	4.37021
5	sp	Anti-human IgG	standard	7	B5	3.08e-05	Stock	Daily	37	Manual	37DSM	23110.5	4.36381
6	sp	Anti-human IgG	standard	7	B5	3.08e-05	Stock	Stock	22	Manual	22SSM	12696.5	4.10368
7	sp	Anti-human IgG	standard	7	B5	3.08e-05	Several	Stock	37	Manual	37SCM	21756.5	4.33759
8	sp	Anti-human IgG	standard	7	B5	3.08e-05	Stock	Daily	22	Automatic	22DSA	16700	4.22272
9	sp	Anti-human IgG	standard	7	B5	3.08e-05	Several	Stock	37	Manual	37SCM	22423	4.35069
10	sp	Anti-human IgG	standard	7	B5	3.08e-05	Stock	Stock	22	Automatic	22SSA	18913.5	4.27677
11	sp	Anti-human IgG	standard	7	B5	3.08e-05	Several	Daily	22	Automatic	22DCA	16508	4.21769
12	sp	Anti-human IgG	standard	7	B5	3.08e-05	Several	Stock	22	Manual	22SCM	14023	4.14684
13	sp	Anti-human IgG	standard	7	B5	3.08e-05	Several	Daily	37	Automatic	37DCA	23452.5	4.37019
14	sp	Anti-human IgG	standard	7	B5	3.08e-05	Several	Daily	22	Manual	22DCM	17288	4.23774
15	sp	Anti-human IgG	standard	7	B5	3.08e-05	Several	Stock	22	Automatic	22SCA	15345.5	4.18598
16	sp	Anti-human IgG	standard	7	B5	3.08e-05	Stock	Daily	37	Automatic	37DSA	23251.5	4.36645
17	sp	Anti-human IgG	standard	7	B5	3.08e-05	Several	Daily	37	Manual	37DCM	21572.5	4.3339
18	sp	Anti-human IgG	standard	7	B5	3.08e-05	Several	Daily	22	Manual	22DCM	14173.5	4.15148
19	sp	Anti-human IgG	standard	7	B5	3.08e-05	Several	Stock	22	Automatic	22SCA	17586.5	4.24518
20	sp	Anti-human IgG	standard	7	B5	3.08e-05	Several	Daily	37	Manual	37DCM	23125.5	4.36409
21	sp	Anti-human IgG	standard	7	B5	3.08e-05	Stock	Daily	37	Automatic	37DSA	21730	4.33706
22	sp	Anti-human IgG	standard	7	B5	3.08e-05	Several	Daily	37	Automatic	37DCA	19683.5	4.2941
23	sp	Anti-human IgG	standard	7	B5	3.08e-05	Stock	Stock	37	Manual	37SSM	22135	4.34508
24	sp	Anti-human IgG	standard	7	B5	3.08e-05	Stock	Daily	37	Manual	37DSM	22381.5	4.34989
25	sp	Anti-human IgG	standard	7	B5	3.08e-05	Several	Daily	22	Automatic	22DCA	19077	4.28051
26	sp	Anti-human IgG	standard	7	B5	3.08e-05	Stock	Daily	22	Manual	22DSM	9614	3.9829
27	sp	Anti-human IgG	standard	7	B5	3.08e-05	Several	Daily	37	Automatic	37DCA	23196	4.36541
28	sp	Anti-human IgG	standard	7	B5	3.08e-05	Several	Stock	37	Automatic	37SCA	23682	4.37442
29	sp	Anti-human IgG	standard	7	B5	3.08e-05	Stock	Daily	22	Manual	22DSM	14692.5	4.1671
30	sp	Anti-human IgG	standard	7	B5	3.08e-05	Several	Daily	22	Manual	22DCM	13898.5	4.14297
31	sp	Anti-human IgG	standard	7	B5	3.08e-05	Several	Stock	22	Manual	22SCM	15389	4.18721
32	sp	Anti-human IgG	standard	7	B5	3.08e-05	Stock	Stock	37	Automatic	37SSA	17241	4.23656
33	sp	Anti-human IgG	standard	7	B5	3.08e-05	Stock	Stock	22	Manual	22SSM	15323.5	4.18536
34	sp	Anti-human IgG	standard	7	B5	3.08e-05	Stock	Daily	22	Automatic	22DSA	16427.5	4.21557
35	sp	Anti-human IgG	standard	7	B5	3.08e-05	Several	Daily	37	Manual	37DCM	23499.5	4.37106
36	sp	Anti-human IgG	standard	7	B5	3.08e-05	Several	Daily	22	Automatic	22DCA	14230.5	4.15322
37	sp	Anti-human IgG	standard	7	B5	3.08e-05	Stock	Stock	37	Manual	37SSM	25199.5	4.40139
38	sp	Anti-human IgG	standard	7	B5	3.08e-05	Stock	Stock	37	Automatic	37SSA	23519.5	4.37143
39	sp	Anti-human IgG	standard	7	B5	3.08e-05	Several	Stock	22	Manual	22SCM	18355.5	4.26377
40	sp	Anti-human IgG	standard	7	B5	3.08e-05	Stock	Stock	22	Automatic	22SSA	12844.5	4.10872
41	sp	Anti-human IgG	standard	7	B5	3.08e-05	Several	Daily	37	Manual	37DCM	17249	4.23676
42	sp	Anti-human IgG	standard	7	B5	3.08e-05	Several	Daily	22	Automatic	22DCA	22470.5	4.35161
43	sp	Anti-human IgG	standard	7	B5	3.08e-05	Stock	Daily	37	Automatic	37DSA	21335	4.32909
44	sp	Anti-human IgG	standard	7	B5	3.08e-05	Several	Stock	22	Automatic	22SCA	13555.5	4.13212
45	sp	Anti-human IgG	standard	7	B5	3.08e-05	Several	Stock	22	Automatic	22SCA	13502	4.1304
46	sp	Anti-human IgG	standard	7	B5	3.08e-05	Stock	Daily	37	Manual	37DSM	15497.5	4.19026
47	sp	Anti-human IgG	standard	7	B5	3.08e-05	Several	Stock	37	Automatic	37SCA	14784.5	4.16981
48	sp	Anti-human IgG	standard	7	B5	3.08e-05	Stock	Daily	22	Manual	22DSM	8326	3.92044
49	sp	Anti-human IgG	standard	7	B5	3.08e-05	Stock	Stock	37	Automatic	37SSA	23520	4.37144
50	sp	Anti-human IgG	standard	7	B5	3.08e-05	Stock	Daily	37	Automatic	37DSA	23606.5	4.37303
51	sp	Anti-human IgG	standard	7	B5	3.08e-05	Several	Stock	37	Manual	37SCM	19013.5	4.27906
52	sp	Anti-human IgG	standard	7	B5	3.08e-05	Stock	Stock	37	Manual	37SSM	23772	4.37607
53	sp	Anti-human IgG	standard	7	B5	3.08e-05	Several	Stock	37	Manual	37SCM	16124.5	4.20749
54	sp	Anti-human IgG	standard	7	B5	3.08e-05	Stock	Stock	22	Automatic	22SSA	13006.5	4.11416
55	sp	Anti-human IgG	standard	7	B5	3.08e-05	Stock	Daily	22	Manual	22DSM	11800	4.07188
56	sp	Anti-human IgG	standard	6	B5	6.94e-05	Several	Stock	22	Manual	22SCM	5257.5	3.72078
57	sp	Anti-human IgG	standard	7	B5	3.08e-05	Several	Daily	37	Automatic	37DCA	20891	4.31996
58	sp	Anti-human IgG	standard	7	B5	3.08e-05	Several	Daily	37	Automatic	37DCA	19292	4.28538
59	sp	Anti-human IgG	standard	7	B5	3.08e-05	Several	Daily	22	Manual	22DCM	14034	4.14718
60	sp	Anti-human IgG	standard	7	B5	3.08e-05	Several	Daily	37	Manual	37DCM	23663	4.37407
61	sp	Anti-human IgG	standard	7	B5	3.08e-05	Several	Stock	37	Automatic	37SCA	16425	4.21551
62	sp	Anti-human IgG	standard	7	B5	3.08e-05	Several	Daily	22	Manual	22DCM	11246	4.051
63	sp	Anti-human IgG	standard	7	B5	3.08e-05	Several	Stock	22	Manual	22SCM	13488	4.12995
64	sp	Anti-human IgG	standard	7	B5	3.08e-05	Several	Daily	22	Automatic	22DCA	14170	4.15137
1	sp	Anti-human IgG	standard	8	B6	1.37e-05	Stock	Daily	22	Automatic	22DSA	8859	3.94738
2	sp	Anti-human IgG	standard	8	B6	1.37e-05	Stock	Stock	22	Automatic	22SSA	9470	3.97635
3	sp	Anti-human IgG	standard	8	B6	1.37e-05	Stock	Stock	37	Automatic	37SSA	13251	4.12225
4	sp	Anti-human IgG	standard	8	B6	1.37e-05	Stock	Stock	37	Manual	37SSM	13387	4.12668
5	sp	Anti-human IgG	standard	8	B6	1.37e-05	Stock	Daily	37	Manual	37DSM	14692	4.16708
6	sp	Anti-human IgG	standard	8	B6	1.37e-05	Stock	Stock	22	Manual	22SSM	7638	3.88298
7	sp	Anti-human IgG	standard	8	B6	1.37e-05	Several	Stock	37	Manual	37SCM	13279	4.12317
8	sp	Anti-human IgG	standard	8	B6	1.37e-05	Stock	Daily	22	Automatic	22DSA	9663.5	3.98513
9	sp	Anti-human IgG	standard	8	B6	1.37e-05	Several	Stock	37	Manual	37SCM	13927.5	4.14387
10	sp	Anti-human IgG	standard	8	B6	1.37e-05	Stock	Stock	22	Automatic	22SSA	10226	4.00971
11	sp	Anti-human IgG	standard	8	B6	1.37e-05	Several	Daily	22	Automatic	22DCA	8884.5	3.94863
12	sp	Anti-human IgG	standard	8	B6	1.37e-05	Several	Stock	22	Manual	22SCM	8233	3.91556
13	sp	Anti-human IgG	standard	8	B6	1.37e-05	Several	Daily	37	Automatic	37DCA	12329	4.09093
14	sp	Anti-human IgG	standard	8	B6	1.37e-05	Several	Daily	22	Manual	22DCM	9963	3.99839
15	sp	Anti-human IgG	standard	8	B6	1.37e-05	Several	Stock	22	Automatic	22SCA	10692	4.02906
16	sp	Anti-human IgG	standard	8	B6	1.37e-05	Stock	Daily	37	Automatic	37DSA	10980	4.0406
17	sp	Anti-human IgG	standard	8	B6	1.37e-05	Several	Daily	37	Manual	37DCM	13832	4.14088
18	sp	Anti-human IgG	standard	8	B6	1.37e-05	Several	Daily	22	Manual	22DCM	8098	3.90838
19	sp	Anti-human IgG	standard	8	B6	1.37e-05	Several	Stock	22	Automatic	22SCA	9163.5	3.96206
20	sp	Anti-human IgG	standard	8	B6	1.37e-05	Several	Daily	37	Manual	37DCM	11333	4.05434
21	sp	Anti-human IgG	standard	8	B6	1.37e-05	Stock	Daily	37	Automatic	37DSA	11697	4.06807
22	sp	Anti-human IgG	standard	8	B6	1.37e-05	Several	Daily	37	Automatic	37DCA	12583.5	4.0998
23	sp	Anti-human IgG	standard	8	B6	1.37e-05	Stock	Stock	37	Manual	37SSM	11695	4.068
24	sp	Anti-human IgG	standard	8	B6	1.37e-05	Stock	Daily	37	Manual	37DSM	13857.5	4.14168
25	sp	Anti-human IgG	standard	8	B6	1.37e-05	Several	Daily	22	Automatic	22DCA	10456	4.01937
26	sp	Anti-human IgG	standard	8	B6	1.37e-05	Stock	Daily	22	Manual	22DSM	5663.5	3.75308
27	sp	Anti-human IgG	standard	8	B6	1.37e-05	Several	Daily	37	Automatic	37DCA	12979	4.11324
28	sp	Anti-human IgG	standard	8	B6	1.37e-05	Several	Stock	37	Automatic	37SCA	13303	4.12395
29	sp	Anti-human IgG	standard	8	B6	1.37e-05	Stock	Daily	22	Manual	22DSM	8488.5	3.92883
30	sp	Anti-human IgG	standard	8	B6	1.37e-05	Several	Daily	22	Manual	22DCM	7550.5	3.87798
31	sp	Anti-human IgG	standard	8	B6	1.37e-05	Several	Stock	22	Manual	22SCM	8511	3.92998
32	sp	Anti-human IgG	standard	8	B6	1.37e-05	Stock	Stock	37	Automatic	37SSA	10279	4.01195
33	sp	Anti-human IgG	standard	8	B6	1.37e-05	Stock	Stock	22	Manual	22SSM	9553	3.98014
34	sp	Anti-human IgG	standard	8	B6	1.37e-05	Stock	Daily	22	Automatic	22DSA	10151.5	4.00653
35	sp	Anti-human IgG	standard	8	B6	1.37e-05	Several	Daily	37	Manual	37DCM	16913	4.22822
36	sp	Anti-human IgG	standard	8	B6	1.37e-05	Several	Daily	22	Automatic	22DCA	9841	3.99304
37	sp	Anti-human IgG	standard	8	B6	1.37e-05	Stock	Stock	37	Manual	37SSM	13006.5	4.11416
38	sp	Anti-human IgG	standard	8	B6	1.37e-05	Stock	Stock	37	Automatic	37SSA	12294.5	4.08971
39	sp	Anti-human IgG	standard	8	B6	1.37e-05	Several	Stock	22	Manual	22SCM	9409.5	3.97357
40	sp	Anti-human IgG	standard	8	B6	1.37e-05	Stock	Stock	22	Automatic	22SSA	6741	3.82872
41	sp	Anti-human IgG	standard	8	B6	1.37e-05	Several	Daily	37	Manual	37DCM	11684.5	4.06761
42	sp	Anti-human IgG	standard	8	B6	1.37e-05	Several	Daily	22	Automatic	22DCA	13817	4.14041
43	sp	Anti-human IgG	standard	8	B6	1.37e-05	Stock	Daily	37	Automatic	37DSA	10985	4.0408
44	sp	Anti-human IgG	standard	8	B6	1.37e-05	Several	Stock	22	Automatic	22SCA	7811	3.89271
45	sp	Anti-human IgG	standard	8	B6	1.37e-05	Several	Stock	22	Automatic	22SCA	7500	3.87506
46	sp	Anti-human IgG	standard	8	B6	1.37e-05	Stock	Daily	37	Manual	37DSM	7666	3.88457
47	sp	Anti-human IgG	standard	8	B6	1.37e-05	Several	Stock	37	Automatic	37SCA	7799	3.89204
48	sp	Anti-human IgG	standard	8	B6	1.37e-05	Stock	Daily	22	Manual	22DSM	4947	3.69434
49	sp	Anti-human IgG	standard	8	B6	1.37e-05	Stock	Stock	37	Automatic	37SSA	12012.5	4.07963
50	sp	Anti-human IgG	standard	8	B6	1.37e-05	Stock	Daily	37	Automatic	37DSA	14163	4.15116
51	sp	Anti-human IgG	standard	8	B6	1.37e-05	Several	Stock	37	Manual	37SCM	10162	4.00698
52	sp	Anti-human IgG	standard	8	B6	1.37e-05	Stock	Stock	37	Manual	37SSM	14133.5	4.15025
53	sp	Anti-human IgG	standard	8	B6	1.37e-05	Several	Stock	37	Manual	37SCM	8376.5	3.92306
54	sp	Anti-human IgG	standard	8	B6	1.37e-05	Stock	Stock	22	Automatic	22SSA	7688.5	3.88584
55	sp	Anti-human IgG	standard	8	B6	1.37e-05	Stock	Daily	22	Manual	22DSM	6025.5	3.77999
56	sp	Anti-human IgG	standard	7	B6	3.08e-05	Several	Stock	22	Manual	22SCM	2556	3.40756
57	sp	Anti-human IgG	standard	8	B6	1.37e-05	Several	Daily	37	Automatic	37DCA	10277	4.01187
58	sp	Anti-human IgG	standard	8	B6	1.37e-05	Several	Daily	37	Automatic	37DCA	10719.5	4.03017
59	sp	Anti-human IgG	standard	8	B6	1.37e-05	Several	Daily	22	Manual	22DCM	7264	3.86118
60	sp	Anti-human IgG	standard	8	B6	1.37e-05	Several	Daily	37	Manual	37DCM	13827	4.14073
61	sp	Anti-human IgG	standard	8	B6	1.37e-05	Several	Stock	37	Automatic	37SCA	8695.5	3.93929
62	sp	Anti-human IgG	standard	8	B6	1.37e-05	Several	Daily	22	Manual	22DCM	5754	3.75997
63	sp	Anti-human IgG	standard	8	B6	1.37e-05	Several	Stock	22	Manual	22SCM	7310.5	3.86395
64	sp	Anti-human IgG	standard	8	B6	1.37e-05	Several	Daily	22	Automatic	22DCA	7410.5	3.86985
1	sp	Anti-human IgG	standard	9	B7	6.09e-06	Stock	Daily	22	Automatic	22DSA	4783.5	3.67975
2	sp	Anti-human IgG	standard	9	B7	6.09e-06	Stock	Stock	22	Automatic	22SSA	4995.5	3.69858
3	sp	Anti-human IgG	standard	9	B7	6.09e-06	Stock	Stock	37	Automatic	37SSA	7197.5	3.85718
4	sp	Anti-human IgG	standard	9	B7	6.09e-06	Stock	Stock	37	Manual	37SSM	6981	3.84392
5	sp	Anti-human IgG	standard	9	B7	6.09e-06	Stock	Daily	37	Manual	37DSM	9341.5	3.97042
6	sp	Anti-human IgG	standard	9	B7	6.09e-06	Stock	Stock	22	Manual	22SSM	3648	3.56205
7	sp	Anti-human IgG	standard	9	B7	6.09e-06	Several	Stock	37	Manual	37SCM	6955.5	3.84233
8	sp	Anti-human IgG	standard	9	B7	6.09e-06	Stock	Daily	22	Automatic	22DSA	5506.5	3.74088
9	sp	Anti-human IgG	standard	9	B7	6.09e-06	Several	Stock	37	Manual	37SCM	7677	3.88519
10	sp	Anti-human IgG	standard	9	B7	6.09e-06	Stock	Stock	22	Automatic	22SSA	6628	3.82138
11	sp	Anti-human IgG	standard	9	B7	6.09e-06	Several	Daily	22	Automatic	22DCA	4751	3.67679
12	sp	Anti-human IgG	standard	9	B7	6.09e-06	Several	Stock	22	Manual	22SCM	5131	3.7102
13	sp	Anti-human IgG	standard	9	B7	6.09e-06	Several	Daily	37	Automatic	37DCA	8453	3.92701
14	sp	Anti-human IgG	standard	9	B7	6.09e-06	Several	Daily	22	Manual	22DCM	4703.5	3.67242
15	sp	Anti-human IgG	standard	9	B7	6.09e-06	Several	Stock	22	Automatic	22SCA	6118	3.78661
16	sp	Anti-human IgG	standard	9	B7	6.09e-06	Stock	Daily	37	Automatic	37DSA	6399	3.80611
17	sp	Anti-human IgG	standard	9	B7	6.09e-06	Several	Daily	37	Manual	37DCM	7767	3.89025
18	sp	Anti-human IgG	standard	9	B7	6.09e-06	Several	Daily	22	Manual	22DCM	4992	3.69827
19	sp	Anti-human IgG	standard	9	B7	6.09e-06	Several	Stock	22	Automatic	22SCA	4682	3.67043
20	sp	Anti-human IgG	standard	9	B7	6.09e-06	Several	Daily	37	Manual	37DCM	6678	3.82465
21	sp	Anti-human IgG	standard	9	B7	6.09e-06	Stock	Daily	37	Automatic	37DSA	6896.5	3.83863
22	sp	Anti-human IgG	standard	9	B7	6.09e-06	Several	Daily	37	Automatic	37DCA	5319.5	3.72587
23	sp	Anti-human IgG	standard	9	B7	6.09e-06	Stock	Stock	37	Manual	37SSM	7263.5	3.86115
24	sp	Anti-human IgG	standard	9	B7	6.09e-06	Stock	Daily	37	Manual	37DSM	7291	3.86279
25	sp	Anti-human IgG	standard	9	B7	6.09e-06	Several	Daily	22	Automatic	22DCA	5140	3.71096
26	sp	Anti-human IgG	standard	9	B7	6.09e-06	Stock	Daily	22	Manual	22DSM	3036	3.4823
27	sp	Anti-human IgG	standard	9	B7	6.09e-06	Several	Daily	37	Automatic	37DCA	6455	3.8099
28	sp	Anti-human IgG	standard	9	B7	6.09e-06	Several	Stock	37	Automatic	37SCA	26188	4.4181
29	sp	Anti-human IgG	standard	9	B7	6.09e-06	Stock	Daily	22	Manual	22DSM	3948.5	3.59643
30	sp	Anti-human IgG	standard	9	B7	6.09e-06	Several	Daily	22	Manual	22DCM	3951.5	3.59676
31	sp	Anti-human IgG	standard	9	B7	6.09e-06	Several	Stock	22	Manual	22SCM	4529	3.656
32	sp	Anti-human IgG	standard	9	B7	6.09e-06	Stock	Stock	37	Automatic	37SSA	5363	3.72941
33	sp	Anti-human IgG	standard	9	B7	6.09e-06	Stock	Stock	22	Manual	22SSM	5909	3.77151
34	sp	Anti-human IgG	standard	9	B7	6.09e-06	Stock	Daily	22	Automatic	22DSA	7149.5	3.85428
35	sp	Anti-human IgG	standard	9	B7	6.09e-06	Several	Daily	37	Manual	37DCM	9667.5	3.98531
36	sp	Anti-human IgG	standard	9	B7	6.09e-06	Several	Daily	22	Automatic	22DCA	6957.5	3.84245
37	sp	Anti-human IgG	standard	9	B7	6.09e-06	Stock	Stock	37	Manual	37SSM	6423	3.80774
38	sp	Anti-human IgG	standard	9	B7	6.09e-06	Stock	Stock	37	Automatic	37SSA	6799	3.83245
39	sp	Anti-human IgG	standard	9	B7	6.09e-06	Several	Stock	22	Manual	22SCM	5088.5	3.70659
40	sp	Anti-human IgG	standard	9	B7	6.09e-06	Stock	Stock	22	Automatic	22SSA	3621.5	3.55889
41	sp	Anti-human IgG	standard	9	B7	6.09e-06	Several	Daily	37	Manual	37DCM	6848	3.83556
42	sp	Anti-human IgG	standard	9	B7	6.09e-06	Several	Daily	22	Automatic	22DCA	8043.5	3.90545
43	sp	Anti-human IgG	standard	9	B7	6.09e-06	Stock	Daily	37	Automatic	37DSA	5404	3.73272
44	sp	Anti-human IgG	standard	9	B7	6.09e-06	Several	Stock	22	Automatic	22SCA	3968.5	3.59863
45	sp	Anti-human IgG	standard	9	B7	6.09e-06	Several	Stock	22	Automatic	22SCA	3393	3.53058
46	sp	Anti-human IgG	standard	9	B7	6.09e-06	Stock	Daily	37	Manual	37DSM	4560	3.65896
47	sp	Anti-human IgG	standard	9	B7	6.09e-06	Several	Stock	37	Automatic	37SCA	4417.5	3.64518
48	sp	Anti-human IgG	standard	9	B7	6.09e-06	Stock	Daily	22	Manual	22DSM	2206.5	3.3437
49	sp	Anti-human IgG	standard	9	B7	6.09e-06	Stock	Stock	37	Automatic	37SSA	6717	3.82718
50	sp	Anti-human IgG	standard	9	B7	6.09e-06	Stock	Daily	37	Automatic	37DSA	6828	3.83429
51	sp	Anti-human IgG	standard	9	B7	6.09e-06	Several	Stock	37	Manual	37SCM	5320	3.72591
52	sp	Anti-human IgG	standard	9	B7	6.09e-06	Stock	Stock	37	Manual	37SSM	7552.5	3.87809
53	sp	Anti-human IgG	standard	9	B7	6.09e-06	Several	Stock	37	Manual	37SCM	4864.5	3.68704
54	sp	Anti-human IgG	standard	9	B7	6.09e-06	Stock	Stock	22	Automatic	22SSA	4104	3.61321
55	sp	Anti-human IgG	standard	9	B7	6.09e-06	Stock	Daily	22	Manual	22DSM	3409.5	3.53269
56	sp	Anti-human IgG	standard	9	B7	6.09e-06	Several	Stock	22	Manual	22SCM	976	2.98945
57	sp	Anti-human IgG	standard	9	B7	6.09e-06	Several	Daily	37	Automatic	37DCA	4815	3.6826
58	sp	Anti-human IgG	standard	9	B7	6.09e-06	Several	Daily	37	Automatic	37DCA	6592.5	3.81905
59	sp	Anti-human IgG	standard	9	B7	6.09e-06	Several	Daily	22	Manual	22DCM	3919.5	3.59323
60	sp	Anti-human IgG	standard	9	B7	6.09e-06	Several	Daily	37	Manual	37DCM	7488.5	3.87439
61	sp	Anti-human IgG	standard	9	B7	6.09e-06	Several	Stock	37	Automatic	37SCA	5393.5	3.73187
62	sp	Anti-human IgG	standard	9	B7	6.09e-06	Several	Daily	22	Manual	22DCM	3003	3.47756
63	sp	Anti-human IgG	standard	9	B7	6.09e-06	Several	Stock	22	Manual	22SCM	4123	3.61521
64	sp	Anti-human IgG	standard	9	B7	6.09e-06	Several	Daily	22	Automatic	22DCA	4038.5	3.60622
1	sp	Anti-human IgG	standard	11	B8	1.2e-06	Stock	Daily	22	Automatic	22DSA	2824	3.45086
2	sp	Anti-human IgG	standard	11	B8	1.2e-06	Stock	Stock	22	Automatic	22SSA	1787.5	3.25225
3	sp	Anti-human IgG	standard	11	B8	1.2e-06	Stock	Stock	37	Automatic	37SSA	3661	3.5636
4	sp	Anti-human IgG	standard	11	B8	1.2e-06	Stock	Stock	37	Manual	37SSM	2521	3.40157
5	sp	Anti-human IgG	standard	11	B8	1.2e-06	Stock	Daily	37	Manual	37DSM	4596.5	3.66243
6	sp	Anti-human IgG	standard	11	B8	1.2e-06	Stock	Stock	22	Manual	22SSM	1472	3.16791
7	sp	Anti-human IgG	standard	11	B8	1.2e-06	Several	Stock	37	Manual	37SCM	2519.5	3.40131
8	sp	Anti-human IgG	standard	11	B8	1.2e-06	Stock	Daily	22	Automatic	22DSA	2760	3.44091
9	sp	Anti-human IgG	standard	11	B8	1.2e-06	Several	Stock	37	Manual	37SCM	2543.5	3.40543
10	sp	Anti-human IgG	standard	11	B8	1.2e-06	Stock	Stock	22	Automatic	22SSA	3022	3.48029
11	sp	Anti-human IgG	standard	11	B8	1.2e-06	Several	Daily	22	Automatic	22DCA	1789.5	3.25273
12	sp	Anti-human IgG	standard	11	B8	1.2e-06	Several	Stock	22	Manual	22SCM	3102.5	3.49171
13	sp	Anti-human IgG	standard	11	B8	1.2e-06	Several	Daily	37	Automatic	37DCA	2541	3.405
14	sp	Anti-human IgG	standard	11	B8	1.2e-06	Several	Daily	22	Manual	22DCM	3130.5	3.49561
15	sp	Anti-human IgG	standard	11	B8	1.2e-06	Several	Stock	22	Automatic	22SCA	2340	3.36922
16	sp	Anti-human IgG	standard	11	B8	1.2e-06	Stock	Daily	37	Automatic	37DSA	2306	3.36286
17	sp	Anti-human IgG	standard	11	B8	1.2e-06	Several	Daily	37	Manual	37DCM	2430	3.38561
18	sp	Anti-human IgG	standard	11	B8	1.2e-06	Several	Daily	22	Manual	22DCM	2511	3.39985
19	sp	Anti-human IgG	standard	11	B8	1.2e-06	Several	Stock	22	Automatic	22SCA	1580	3.19866
20	sp	Anti-human IgG	standard	11	B8	1.2e-06	Several	Daily	37	Manual	37DCM	4187	3.6219
21	sp	Anti-human IgG	standard	11	B8	1.2e-06	Stock	Daily	37	Automatic	37DSA	3282.5	3.5162
22	sp	Anti-human IgG	standard	11	B8	1.2e-06	Several	Daily	37	Automatic	37DCA	3249	3.51175
23	sp	Anti-human IgG	standard	11	B8	1.2e-06	Stock	Stock	37	Manual	37SSM	2436.5	3.38677
24	sp	Anti-human IgG	standard	11	B8	1.2e-06	Stock	Daily	37	Manual	37DSM	2645	3.42243
25	sp	Anti-human IgG	standard	11	B8	1.2e-06	Several	Daily	22	Automatic	22DCA	2007.5	3.30266
26	sp	Anti-human IgG	standard	11	B8	1.2e-06	Stock	Daily	22	Manual	22DSM	977.5	2.99012
27	sp	Anti-human IgG	standard	11	B8	1.2e-06	Several	Daily	37	Automatic	37DCA	2179	3.33826
28	sp	Anti-human IgG	standard	11	B8	1.2e-06	Several	Stock	37	Automatic	37SCA	2632.5	3.42037
29	sp	Anti-human IgG	standard	11	B8	1.2e-06	Stock	Daily	22	Manual	22DSM	1324.5	3.12205
30	sp	Anti-human IgG	standard	11	B8	1.2e-06	Several	Daily	22	Manual	22DCM	1486.5	3.17216
31	sp	Anti-human IgG	standard	11	B8	1.2e-06	Several	Stock	22	Manual	22SCM	1540	3.18752
32	sp	Anti-human IgG	standard	11	B8	1.2e-06	Stock	Stock	37	Automatic	37SSA	1668	3.2222
33	sp	Anti-human IgG	standard	11	B8	1.2e-06	Stock	Stock	22	Manual	22SSM	3577	3.55352
34	sp	Anti-human IgG	standard	11	B8	1.2e-06	Stock	Daily	22	Automatic	22DSA	5041.5	3.70256
35	sp	Anti-human IgG	standard	11	B8	1.2e-06	Several	Daily	37	Manual	37DCM	6778.5	3.83113
36	sp	Anti-human IgG	standard	11	B8	1.2e-06	Several	Daily	22	Automatic	22DCA	5254	3.72049
37	sp	Anti-human IgG	standard	11	B8	1.2e-06	Stock	Stock	37	Manual	37SSM	2409	3.38184
38	sp	Anti-human IgG	standard	11	B8	1.2e-06	Stock	Stock	37	Automatic	37SSA	2190.5	3.34054
39	sp	Anti-human IgG	standard	11	B8	1.2e-06	Several	Stock	22	Manual	22SCM	1971	3.29469
40	sp	Anti-human IgG	standard	11	B8	1.2e-06	Stock	Stock	22	Automatic	22SSA	1272.5	3.10466
41	sp	Anti-human IgG	standard	11	B8	1.2e-06	Several	Daily	37	Manual	37DCM	2546	3.40586
42	sp	Anti-human IgG	standard	11	B8	1.2e-06	Several	Daily	22	Automatic	22DCA	3655	3.56289
43	sp	Anti-human IgG	standard	11	B8	1.2e-06	Stock	Daily	37	Automatic	37DSA	1771	3.24822
44	sp	Anti-human IgG	standard	11	B8	1.2e-06	Several	Stock	22	Automatic	22SCA	1397.5	3.14535
45	sp	Anti-human IgG	standard	11	B8	1.2e-06	Several	Stock	22	Automatic	22SCA	1251	3.09726
46	sp	Anti-human IgG	standard	11	B8	1.2e-06	Stock	Daily	37	Manual	37DSM	1527	3.18384
47	sp	Anti-human IgG	standard	11	B8	1.2e-06	Several	Stock	37	Automatic	37SCA	1514	3.18013
48	sp	Anti-human IgG	standard	11	B8	1.2e-06	Stock	Daily	22	Manual	22DSM	933	2.96988
49	sp	Anti-human IgG	standard	11	B8	1.2e-06	Stock	Stock	37	Automatic	37SSA	2119.5	3.32623
50	sp	Anti-human IgG	standard	11	B8	1.2e-06	Stock	Daily	37	Automatic	37DSA	2288	3.35946
51	sp	Anti-human IgG	standard	11	B8	1.2e-06	Several	Stock	37	Manual	37SCM	1773.5	3.24883
52	sp	Anti-human IgG	standard	11	B8	1.2e-06	Stock	Stock	37	Manual	37SSM	5226.5	3.71821
53	sp	Anti-human IgG	standard	11	B8	1.2e-06	Several	Stock	37	Manual	37SCM	1648.5	3.21709
54	sp	Anti-human IgG	standard	11	B8	1.2e-06	Stock	Stock	22	Automatic	22SSA	1925	3.28443
55	sp	Anti-human IgG	standard	11	B8	1.2e-06	Stock	Daily	22	Manual	22DSM	1185.5	3.0739
56	sp	Anti-human IgG	standard	11	B8	1.2e-06	Several	Stock	22	Manual	22SCM	679.5	2.83219
57	sp	Anti-human IgG	standard	11	B8	1.2e-06	Several	Daily	37	Automatic	37DCA	1891	3.27669
58	sp	Anti-human IgG	standard	11	B8	1.2e-06	Several	Daily	37	Automatic	37DCA	1868	3.27138
59	sp	Anti-human IgG	standard	11	B8	1.2e-06	Several	Daily	22	Manual	22DCM	1346.5	3.12921
60	sp	Anti-human IgG	standard	11	B8	1.2e-06	Several	Daily	37	Manual	37DCM	2537.5	3.40441
61	sp	Anti-human IgG	standard	11	B8	1.2e-06	Several	Stock	37	Automatic	37SCA	1558.5	3.19271
62	sp	Anti-human IgG	standard	11	B8	1.2e-06	Several	Daily	22	Manual	22DCM	1128	3.05231
63	sp	Anti-human IgG	standard	11	B8	1.2e-06	Several	Stock	22	Manual	22SCM	1283.5	3.1084
64	sp	Anti-human IgG	standard	11	B8	1.2e-06	Several	Daily	22	Automatic	22DCA	1642	3.21537
1	sp	Anti-human IgG	standard	12	B9	5.35e-07	Stock	Daily	22	Automatic	22DSA	2333.5	3.36801
2	sp	Anti-human IgG	standard	12	B9	5.35e-07	Stock	Stock	22	Automatic	22SSA	1263.5	3.10158
3	sp	Anti-human IgG	standard	12	B9	5.35e-07	Stock	Stock	37	Automatic	37SSA	3126.5	3.49506
4	sp	Anti-human IgG	standard	12	B9	5.35e-07	Stock	Stock	37	Manual	37SSM	1841	3.26505
5	sp	Anti-human IgG	standard	12	B9	5.35e-07	Stock	Daily	37	Manual	37DSM	4093.5	3.61209
6	sp	Anti-human IgG	standard	12	B9	5.35e-07	Stock	Stock	22	Manual	22SSM	1197.5	3.07828
7	sp	Anti-human IgG	standard	12	B9	5.35e-07	Several	Stock	37	Manual	37SCM	1753.5	3.24391
8	sp	Anti-human IgG	standard	12	B9	5.35e-07	Stock	Daily	22	Automatic	22DSA	2420.5	3.38391
9	sp	Anti-human IgG	standard	12	B9	5.35e-07	Several	Stock	37	Manual	37SCM	1720	3.23553
10	sp	Anti-human IgG	standard	12	B9	5.35e-07	Stock	Stock	22	Automatic	22SSA	2467	3.39217
11	sp	Anti-human IgG	standard	12	B9	5.35e-07	Several	Daily	22	Automatic	22DCA	1435	3.15685
12	sp	Anti-human IgG	standard	12	B9	5.35e-07	Several	Stock	22	Manual	22SCM	2344.5	3.37005
13	sp	Anti-human IgG	standard	12	B9	5.35e-07	Several	Daily	37	Automatic	37DCA	1698	3.22994
14	sp	Anti-human IgG	standard	12	B9	5.35e-07	Several	Daily	22	Manual	22DCM	1483	3.17114
15	sp	Anti-human IgG	standard	12	B9	5.35e-07	Several	Stock	22	Automatic	22SCA	24625.5	4.39139
16	sp	Anti-human IgG	standard	12	B9	5.35e-07	Stock	Daily	37	Automatic	37DSA	1741.5	3.24092
17	sp	Anti-human IgG	standard	12	B9	5.35e-07	Several	Daily	37	Manual	37DCM	1589.5	3.20126
18	sp	Anti-human IgG	standard	12	B9	5.35e-07	Several	Daily	22	Manual	22DCM	2265	3.35507
19	sp	Anti-human IgG	standard	12	B9	5.35e-07	Several	Stock	22	Automatic	22SCA	1197	3.07809
20	sp	Anti-human IgG	standard	12	B9	5.35e-07	Several	Daily	37	Manual	37DCM	1877.5	3.27358
21	sp	Anti-human IgG	standard	12	B9	5.35e-07	Stock	Daily	37	Automatic	37DSA	1792	3.25334
22	sp	Anti-human IgG	standard	12	B9	5.35e-07	Several	Daily	37	Automatic	37DCA	1776	3.24944
23	sp	Anti-human IgG	standard	12	B9	5.35e-07	Stock	Stock	37	Manual	37SSM	1852.5	3.26776
24	sp	Anti-human IgG	standard	12	B9	5.35e-07	Stock	Daily	37	Manual	37DSM	1935	3.28668
25	sp	Anti-human IgG	standard	12	B9	5.35e-07	Several	Daily	22	Automatic	22DCA	1350.5	3.13049
26	sp	Anti-human IgG	standard	12	B9	5.35e-07	Stock	Daily	22	Manual	22DSM	669.5	2.82575
27	sp	Anti-human IgG	standard	12	B9	5.35e-07	Several	Daily	37	Automatic	37DCA	1645	3.21617
28	sp	Anti-human IgG	standard	12	B9	5.35e-07	Several	Stock	37	Automatic	37SCA	1911.5	3.28137
29	sp	Anti-human IgG	standard	12	B9	5.35e-07	Stock	Daily	22	Manual	22DSM	852.5	2.93069
30	sp	Anti-human IgG	standard	12	B9	5.35e-07	Several	Daily	22	Manual	22DCM	1025	3.01072
31	sp	Anti-human IgG	standard	12	B9	5.35e-07	Several	Stock	22	Manual	22SCM	1191.5	3.07609
32	sp	Anti-human IgG	standard	12	B9	5.35e-07	Stock	Stock	37	Automatic	37SSA	1422.5	3.15305
33	sp	Anti-human IgG	standard	12	B9	5.35e-07	Stock	Stock	22	Manual	22SSM	3400.5	3.53154
34	sp	Anti-human IgG	standard	12	B9	5.35e-07	Stock	Daily	22	Automatic	22DSA	4874.5	3.68793
35	sp	Anti-human IgG	standard	12	B9	5.35e-07	Several	Daily	37	Manual	37DCM	5819	3.76485
36	sp	Anti-human IgG	standard	12	B9	5.35e-07	Several	Daily	22	Automatic	22DCA	4453	3.64865
37	sp	Anti-human IgG	standard	12	B9	5.35e-07	Stock	Stock	37	Manual	37SSM	1523.5	3.18284
38	sp	Anti-human IgG	standard	12	B9	5.35e-07	Stock	Stock	37	Automatic	37SSA	1498	3.17551
39	sp	Anti-human IgG	standard	12	B9	5.35e-07	Several	Stock	22	Manual	22SCM	1320.5	3.12074
40	sp	Anti-human IgG	standard	12	B9	5.35e-07	Stock	Stock	22	Automatic	22SSA	974	2.98856
41	sp	Anti-human IgG	standard	12	B9	5.35e-07	Several	Daily	37	Manual	37DCM	2058.5	3.31355
42	sp	Anti-human IgG	standard	12	B9	5.35e-07	Several	Daily	22	Automatic	22DCA	3206.5	3.50603
43	sp	Anti-human IgG	standard	12	B9	5.35e-07	Stock	Daily	37	Automatic	37DSA	1272	3.10449
44	sp	Anti-human IgG	standard	12	B9	5.35e-07	Several	Stock	22	Automatic	22SCA	1005.5	3.00238
45	sp	Anti-human IgG	standard	12	B9	5.35e-07	Several	Stock	22	Automatic	22SCA	894.5	2.95158
46	sp	Anti-human IgG	standard	12	B9	5.35e-07	Stock	Daily	37	Manual	37DSM	1084	3.03503
47	sp	Anti-human IgG	standard	12	B9	5.35e-07	Several	Stock	37	Automatic	37SCA	1032.5	3.01389
48	sp	Anti-human IgG	standard	12	B9	5.35e-07	Stock	Daily	22	Manual	22DSM	647	2.8109
49	sp	Anti-human IgG	standard	12	B9	5.35e-07	Stock	Stock	37	Automatic	37SSA	1402.5	3.1469
50	sp	Anti-human IgG	standard	12	B9	5.35e-07	Stock	Daily	37	Automatic	37DSA	1502	3.17667
51	sp	Anti-human IgG	standard	12	B9	5.35e-07	Several	Stock	37	Manual	37SCM	1191	3.07591
52	sp	Anti-human IgG	standard	12	B9	5.35e-07	Stock	Stock	37	Manual	37SSM	1510	3.17898
53	sp	Anti-human IgG	standard	12	B9	5.35e-07	Several	Stock	37	Manual	37SCM	1069	3.02898
54	sp	Anti-human IgG	standard	12	B9	5.35e-07	Stock	Stock	22	Automatic	22SSA	1171	3.06856
55	sp	Anti-human IgG	standard	12	B9	5.35e-07	Stock	Daily	22	Manual	22DSM	813	2.91009
56	sp	Anti-human IgG	standard	12	B9	5.35e-07	Several	Stock	22	Manual	22SCM	647.5	2.81124
57	sp	Anti-human IgG	standard	12	B9	5.35e-07	Several	Daily	37	Automatic	37DCA	1360	3.13354
58	sp	Anti-human IgG	standard	12	B9	5.35e-07	Several	Daily	37	Automatic	37DCA	1494	3.17435
59	sp	Anti-human IgG	standard	12	B9	5.35e-07	Several	Daily	22	Manual	22DCM	1146.5	3.05937
60	sp	Anti-human IgG	standard	12	B9	5.35e-07	Several	Daily	37	Manual	37DCM	1823	3.26079
61	sp	Anti-human IgG	standard	12	B9	5.35e-07	Several	Stock	37	Automatic	37SCA	1090	3.03743
62	sp	Anti-human IgG	standard	12	B9	5.35e-07	Several	Daily	22	Manual	22DCM	829	2.91855
63	sp	Anti-human IgG	standard	12	B9	5.35e-07	Several	Stock	22	Manual	22SCM	974	2.98856
64	sp	Anti-human IgG	standard	12	B9	5.35e-07	Several	Daily	22	Automatic	22DCA	1188	3.07482
1	mp	PfRH5	subject	1A	C1	NA	Stock	Daily	22	Automatic	22DSA	18903.5	4.27654
1	mp	Peptide VAR2CSA	subject	1A	C1	NA	Stock	Daily	22	Automatic	22DSA	605	2.78176
1	mp	AMA1 FVO	subject	1A	C1	NA	Stock	Daily	22	Automatic	22DSA	21870	4.33985
1	mp	MSP1_42 FVO	subject	1A	C1	NA	Stock	Daily	22	Automatic	22DSA	18550.5	4.26836
1	mp	EBA175	subject	1A	C1	NA	Stock	Daily	22	Automatic	22DSA	5167	3.71324
1	mp	LSA1	subject	1A	C1	NA	Stock	Daily	22	Automatic	22DSA	6799	3.83245
1	mp	SSP2	subject	1A	C1	NA	Stock	Daily	22	Automatic	22DSA	4622	3.66483
2	mp	PfRH5	subject	1A	C1	NA	Stock	Stock	22	Automatic	22SSA	23917	4.37871
2	mp	Peptide VAR2CSA	subject	1A	C1	NA	Stock	Stock	22	Automatic	22SSA	959	2.98182
2	mp	AMA1 FVO	subject	1A	C1	NA	Stock	Stock	22	Automatic	22SSA	24018	4.38054
2	mp	MSP1_42 FVO	subject	1A	C1	NA	Stock	Stock	22	Automatic	22SSA	24107	4.38214
2	mp	EBA175	subject	1A	C1	NA	Stock	Stock	22	Automatic	22SSA	9873	3.99445
2	mp	LSA1	subject	1A	C1	NA	Stock	Stock	22	Automatic	22SSA	10706	4.02963
2	mp	SSP2	subject	1A	C1	NA	Stock	Stock	22	Automatic	22SSA	8060.5	3.90636
3	mp	MSP1_42 FVO	subject	1A	C1	NA	Stock	Stock	37	Automatic	37SSA	24290.5	4.38544
3	mp	PfRH5	subject	1A	C1	NA	Stock	Stock	37	Automatic	37SSA	14795	4.17011
3	mp	Peptide VAR2CSA	subject	1A	C1	NA	Stock	Stock	37	Automatic	37SSA	528	2.72263
3	mp	AMA1 FVO	subject	1A	C1	NA	Stock	Stock	37	Automatic	37SSA	23742.5	4.37553
3	mp	EBA175	subject	1A	C1	NA	Stock	Stock	37	Automatic	37SSA	9531	3.97914
3	mp	LSA1	subject	1A	C1	NA	Stock	Stock	37	Automatic	37SSA	15153.5	4.18051
3	mp	SSP2	subject	1A	C1	NA	Stock	Stock	37	Automatic	37SSA	5541.5	3.74363
4	mp	MSP1_42 FVO	subject	1A	C1	NA	Stock	Stock	37	Manual	37SSM	17251.5	4.23683
4	mp	PfRH5	subject	1A	C1	NA	Stock	Stock	37	Manual	37SSM	2693	3.43024
4	mp	Peptide VAR2CSA	subject	1A	C1	NA	Stock	Stock	37	Manual	37SSM	252	2.4014
4	mp	AMA1 FVO	subject	1A	C1	NA	Stock	Stock	37	Manual	37SSM	12792	4.10694
4	mp	EBA175	subject	1A	C1	NA	Stock	Stock	37	Manual	37SSM	2000	3.30103
4	mp	LSA1	subject	1A	C1	NA	Stock	Stock	37	Manual	37SSM	1827	3.26174
4	mp	SSP2	subject	1A	C1	NA	Stock	Stock	37	Manual	37SSM	609	2.78462
5	mp	AMA1 FVO	subject	1A	C1	NA	Stock	Daily	37	Manual	37DSM	25511	4.40673
5	mp	LSA1	subject	1A	C1	NA	Stock	Daily	37	Manual	37DSM	14547	4.16277
5	mp	SSP2	subject	1A	C1	NA	Stock	Daily	37	Manual	37DSM	4700	3.6721
5	mp	PfRH5	subject	1A	C1	NA	Stock	Daily	37	Manual	37DSM	14112	4.14959
5	mp	Peptide VAR2CSA	subject	1A	C1	NA	Stock	Daily	37	Manual	37DSM	554	2.74351
5	mp	MSP1_42 FVO	subject	1A	C1	NA	Stock	Daily	37	Manual	37DSM	26429	4.42208
5	mp	EBA175	subject	1A	C1	NA	Stock	Daily	37	Manual	37DSM	7125	3.85278
6	mp	Peptide VAR2CSA	subject	1A	C1	NA	Stock	Stock	22	Manual	22SSM	250	2.39794
6	mp	MSP1_42 FVO	subject	1A	C1	NA	Stock	Stock	22	Manual	22SSM	11515	4.06126
6	mp	SSP2	subject	1A	C1	NA	Stock	Stock	22	Manual	22SSM	1143	3.05805
6	mp	LSA1	subject	1A	C1	NA	Stock	Stock	22	Manual	22SSM	1644	3.2159
6	mp	PfRH5	subject	1A	C1	NA	Stock	Stock	22	Manual	22SSM	8710.5	3.94004
6	mp	EBA175	subject	1A	C1	NA	Stock	Stock	22	Manual	22SSM	2326	3.36661
6	mp	AMA1 FVO	subject	1A	C1	NA	Stock	Stock	22	Manual	22SSM	11791.5	4.07157
7	mp	PfRH5	subject	1A	C1	NA	Several	Stock	37	Manual	37SCM	16871.5	4.22715
7	mp	Peptide VAR2CSA	subject	1A	C1	NA	Several	Stock	37	Manual	37SCM	611	2.78604
7	mp	EBA175	subject	1A	C1	NA	Several	Stock	37	Manual	37SCM	9963	3.99839
7	mp	MSP1_42 FVO	subject	1A	C1	NA	Several	Stock	37	Manual	37SCM	27583.5	4.44065
7	mp	LSA1	subject	1A	C1	NA	Several	Stock	37	Manual	37SCM	26231.5	4.41882
7	mp	SSP2	subject	1A	C1	NA	Several	Stock	37	Manual	37SCM	5082	3.70603
7	mp	AMA1 FVO	subject	1A	C1	NA	Several	Stock	37	Manual	37SCM	27837	4.44462
8	mp	PfRH5	subject	1A	C1	NA	Stock	Daily	22	Automatic	22DSA	24150	4.38292
8	mp	LSA1	subject	1A	C1	NA	Stock	Daily	22	Automatic	22DSA	8886	3.94871
8	mp	SSP2	subject	1A	C1	NA	Stock	Daily	22	Automatic	22DSA	6500.5	3.81295
8	mp	Peptide VAR2CSA	subject	1A	C1	NA	Stock	Daily	22	Automatic	22DSA	686	2.83632
8	mp	AMA1 FVO	subject	1A	C1	NA	Stock	Daily	22	Automatic	22DSA	24562.5	4.39027
8	mp	EBA175	subject	1A	C1	NA	Stock	Daily	22	Automatic	22DSA	8454	3.92706
8	mp	MSP1_42 FVO	subject	1A	C1	NA	Stock	Daily	22	Automatic	22DSA	24547.5	4.39001
9	mp	PfRH5	subject	1A	C1	NA	Several	Stock	37	Manual	37SCM	11490	4.06032
9	mp	LSA1	subject	1A	C1	NA	Several	Stock	37	Manual	37SCM	23205	4.36558
9	mp	Peptide VAR2CSA	subject	1A	C1	NA	Several	Stock	37	Manual	37SCM	487	2.68753
9	mp	AMA1 FVO	subject	1A	C1	NA	Several	Stock	37	Manual	37SCM	24191	4.38365
9	mp	EBA175	subject	1A	C1	NA	Several	Stock	37	Manual	37SCM	8209	3.91429
9	mp	SSP2	subject	1A	C1	NA	Several	Stock	37	Manual	37SCM	3376	3.5284
9	mp	MSP1_42 FVO	subject	1A	C1	NA	Several	Stock	37	Manual	37SCM	24838	4.39512
10	mp	PfRH5	subject	1A	C1	NA	Stock	Stock	22	Automatic	22SSA	26718.5	4.42681
10	mp	Peptide VAR2CSA	subject	1A	C1	NA	Stock	Stock	22	Automatic	22SSA	804	2.90526
10	mp	AMA1 FVO	subject	1A	C1	NA	Stock	Stock	22	Automatic	22SSA	27716.5	4.44274
10	mp	MSP1_42 FVO	subject	1A	C1	NA	Stock	Stock	22	Automatic	22SSA	28251	4.45103
10	mp	EBA175	subject	1A	C1	NA	Stock	Stock	22	Automatic	22SSA	11867.5	4.07436
10	mp	LSA1	subject	1A	C1	NA	Stock	Stock	22	Automatic	22SSA	13250	4.12222
10	mp	SSP2	subject	1A	C1	NA	Stock	Stock	22	Automatic	22SSA	9972.5	3.9988
11	mp	PfRH5	subject	1A	C1	NA	Several	Daily	22	Automatic	22DCA	24555	4.39014
11	mp	Peptide VAR2CSA	subject	1A	C1	NA	Several	Daily	22	Automatic	22DCA	876	2.9425
11	mp	AMA1 FVO	subject	1A	C1	NA	Several	Daily	22	Automatic	22DCA	25432	4.40538
11	mp	MSP1_42 FVO	subject	1A	C1	NA	Several	Daily	22	Automatic	22DCA	25295	4.40303
11	mp	EBA175	subject	1A	C1	NA	Several	Daily	22	Automatic	22DCA	9925	3.99673
11	mp	LSA1	subject	1A	C1	NA	Several	Daily	22	Automatic	22DCA	24383	4.38709
11	mp	SSP2	subject	1A	C1	NA	Several	Daily	22	Automatic	22DCA	7340.5	3.86573
12	mp	PfRH5	subject	1A	C1	NA	Several	Stock	22	Manual	22SCM	13554	4.13207
12	mp	Peptide VAR2CSA	subject	1A	C1	NA	Several	Stock	22	Manual	22SCM	354	2.549
12	mp	AMA1 FVO	subject	1A	C1	NA	Several	Stock	22	Manual	22SCM	16753	4.22409
12	mp	MSP1_42 FVO	subject	1A	C1	NA	Several	Stock	22	Manual	22SCM	16198	4.20946
12	mp	EBA175	subject	1A	C1	NA	Several	Stock	22	Manual	22SCM	3641	3.56122
12	mp	LSA1	subject	1A	C1	NA	Several	Stock	22	Manual	22SCM	10019.5	4.00085
12	mp	SSP2	subject	1A	C1	NA	Several	Stock	22	Manual	22SCM	1797.5	3.25467
13	mp	PfRH5	subject	1A	C1	NA	Several	Daily	37	Automatic	37DCA	9385.5	3.97246
13	mp	Peptide VAR2CSA	subject	1A	C1	NA	Several	Daily	37	Automatic	37DCA	400.5	2.6026
13	mp	AMA1 FVO	subject	1A	C1	NA	Several	Daily	37	Automatic	37DCA	14428.5	4.15922
13	mp	MSP1_42 FVO	subject	1A	C1	NA	Several	Daily	37	Automatic	37DCA	17582	4.24507
13	mp	EBA175	subject	1A	C1	NA	Several	Daily	37	Automatic	37DCA	3413	3.53314
13	mp	LSA1	subject	1A	C1	NA	Several	Daily	37	Automatic	37DCA	14245.5	4.15368
13	mp	SSP2	subject	1A	C1	NA	Several	Daily	37	Automatic	37DCA	2354	3.37181
14	mp	PfRH5	subject	1A	C1	NA	Several	Daily	22	Manual	22DCM	24693	4.39257
14	mp	Peptide VAR2CSA	subject	1A	C1	NA	Several	Daily	22	Manual	22DCM	1271.5	3.10432
14	mp	AMA1 FVO	subject	1A	C1	NA	Several	Daily	22	Manual	22DCM	24678.5	4.39232
14	mp	MSP1_42 FVO	subject	1A	C1	NA	Several	Daily	22	Manual	22DCM	24490.5	4.389
14	mp	EBA175	subject	1A	C1	NA	Several	Daily	22	Manual	22DCM	11985	4.07864
14	mp	LSA1	subject	1A	C1	NA	Several	Daily	22	Manual	22DCM	23820	4.37694
14	mp	SSP2	subject	1A	C1	NA	Several	Daily	22	Manual	22DCM	8768	3.9429
15	mp	PfRH5	subject	1A	C1	NA	Several	Stock	22	Automatic	22SCA	10563	4.02379
15	mp	Peptide VAR2CSA	subject	1A	C1	NA	Several	Stock	22	Automatic	22SCA	336	2.52634
15	mp	AMA1 FVO	subject	1A	C1	NA	Several	Stock	22	Automatic	22SCA	11767	4.07067
15	mp	MSP1_42 FVO	subject	1A	C1	NA	Several	Stock	22	Automatic	22SCA	13761	4.13865
15	mp	EBA175	subject	1A	C1	NA	Several	Stock	22	Automatic	22SCA	3098.5	3.49115
15	mp	LSA1	subject	1A	C1	NA	Several	Stock	22	Automatic	22SCA	7054	3.84844
15	mp	SSP2	subject	1A	C1	NA	Several	Stock	22	Automatic	22SCA	1733.5	3.23892
16	mp	PfRH5	subject	1A	C1	NA	Stock	Daily	37	Automatic	37DSA	10940	4.03902
16	mp	Peptide VAR2CSA	subject	1A	C1	NA	Stock	Daily	37	Automatic	37DSA	615	2.78888
16	mp	AMA1 FVO	subject	1A	C1	NA	Stock	Daily	37	Automatic	37DSA	23248	4.36639
16	mp	MSP1_42 FVO	subject	1A	C1	NA	Stock	Daily	37	Automatic	37DSA	24526.5	4.38964
16	mp	EBA175	subject	1A	C1	NA	Stock	Daily	37	Automatic	37DSA	4582	3.66106
16	mp	LSA1	subject	1A	C1	NA	Stock	Daily	37	Automatic	37DSA	5796.5	3.76317
16	mp	SSP2	subject	1A	C1	NA	Stock	Daily	37	Automatic	37DSA	2158	3.33405
17	mp	PfRH5	subject	1A	C1	NA	Several	Daily	37	Manual	37DCM	24388.5	4.38719
17	mp	Peptide VAR2CSA	subject	1A	C1	NA	Several	Daily	37	Manual	37DCM	1698	3.22994
17	mp	AMA1 FVO	subject	1A	C1	NA	Several	Daily	37	Manual	37DCM	25357.5	4.40411
17	mp	MSP1_42 FVO	subject	1A	C1	NA	Several	Daily	37	Manual	37DCM	25279	4.40276
17	mp	EBA175	subject	1A	C1	NA	Several	Daily	37	Manual	37DCM	13095.5	4.11712
17	mp	LSA1	subject	1A	C1	NA	Several	Daily	37	Manual	37DCM	26335.5	4.42054
17	mp	SSP2	subject	1A	C1	NA	Several	Daily	37	Manual	37DCM	8357	3.92205
18	mp	PfRH5	subject	1A	C1	NA	Several	Daily	22	Manual	22DCM	13053	4.11571
18	mp	Peptide VAR2CSA	subject	1A	C1	NA	Several	Daily	22	Manual	22DCM	427	2.63043
18	mp	AMA1 FVO	subject	1A	C1	NA	Several	Daily	22	Manual	22DCM	16644	4.22126
18	mp	MSP1_42 FVO	subject	1A	C1	NA	Several	Daily	22	Manual	22DCM	16373	4.21413
18	mp	EBA175	subject	1A	C1	NA	Several	Daily	22	Manual	22DCM	3793	3.57898
18	mp	LSA1	subject	1A	C1	NA	Several	Daily	22	Manual	22DCM	10069.5	4.00301
18	mp	SSP2	subject	1A	C1	NA	Several	Daily	22	Manual	22DCM	2103.5	3.32294
19	mp	PfRH5	subject	1A	C1	NA	Several	Stock	22	Automatic	22SCA	24831	4.39499
19	mp	Peptide VAR2CSA	subject	1A	C1	NA	Several	Stock	22	Automatic	22SCA	1010.5	3.00454
19	mp	AMA1 FVO	subject	1A	C1	NA	Several	Stock	22	Automatic	22SCA	24274	4.38514
19	mp	MSP1_42 FVO	subject	1A	C1	NA	Several	Stock	22	Automatic	22SCA	24415.5	4.38767
19	mp	EBA175	subject	1A	C1	NA	Several	Stock	22	Automatic	22SCA	13312	4.12424
19	mp	LSA1	subject	1A	C1	NA	Several	Stock	22	Automatic	22SCA	24069	4.38146
19	mp	SSP2	subject	1A	C1	NA	Several	Stock	22	Automatic	22SCA	9279	3.9675
20	mp	PfRH5	subject	1A	C1	NA	Several	Daily	37	Manual	37DCM	14554	4.16298
20	mp	Peptide VAR2CSA	subject	1A	C1	NA	Several	Daily	37	Manual	37DCM	452.5	2.65562
20	mp	AMA1 FVO	subject	1A	C1	NA	Several	Daily	37	Manual	37DCM	21722.5	4.33691
20	mp	MSP1_42 FVO	subject	1A	C1	NA	Several	Daily	37	Manual	37DCM	23737.5	4.37543
20	mp	EBA175	subject	1A	C1	NA	Several	Daily	37	Manual	37DCM	6620	3.82086
20	mp	LSA1	subject	1A	C1	NA	Several	Daily	37	Manual	37DCM	23319	4.36771
20	mp	SSP2	subject	1A	C1	NA	Several	Daily	37	Manual	37DCM	2780	3.44404
21	mp	PfRH5	subject	1A	C1	NA	Stock	Daily	37	Automatic	37DSA	12579.5	4.09966
21	mp	Peptide VAR2CSA	subject	1A	C1	NA	Stock	Daily	37	Automatic	37DSA	459	2.66181
21	mp	AMA1 FVO	subject	1A	C1	NA	Stock	Daily	37	Automatic	37DSA	23861	4.37769
21	mp	MSP1_42 FVO	subject	1A	C1	NA	Stock	Daily	37	Automatic	37DSA	23780.5	4.37622
21	mp	EBA175	subject	1A	C1	NA	Stock	Daily	37	Automatic	37DSA	6254	3.79616
21	mp	LSA1	subject	1A	C1	NA	Stock	Daily	37	Automatic	37DSA	11474.5	4.05973
21	mp	SSP2	subject	1A	C1	NA	Stock	Daily	37	Automatic	37DSA	4493.5	3.65258
22	mp	PfRH5	subject	1A	C1	NA	Several	Daily	37	Automatic	37DCA	23326	4.36784
22	mp	Peptide VAR2CSA	subject	1A	C1	NA	Several	Daily	37	Automatic	37DCA	2376	3.37585
22	mp	AMA1 FVO	subject	1A	C1	NA	Several	Daily	37	Automatic	37DCA	24143.5	4.3828
22	mp	MSP1_42 FVO	subject	1A	C1	NA	Several	Daily	37	Automatic	37DCA	24133	4.38261
22	mp	EBA175	subject	1A	C1	NA	Several	Daily	37	Automatic	37DCA	12966	4.11281
22	mp	LSA1	subject	1A	C1	NA	Several	Daily	37	Automatic	37DCA	23619	4.37326
22	mp	SSP2	subject	1A	C1	NA	Several	Daily	37	Automatic	37DCA	7438.5	3.87149
23	mp	PfRH5	subject	1A	C1	NA	Stock	Stock	37	Manual	37SSM	15147	4.18033
23	mp	Peptide VAR2CSA	subject	1A	C1	NA	Stock	Stock	37	Manual	37SSM	544	2.7356
23	mp	AMA1 FVO	subject	1A	C1	NA	Stock	Stock	37	Manual	37SSM	26564.5	4.4243
23	mp	MSP1_42 FVO	subject	1A	C1	NA	Stock	Stock	37	Manual	37SSM	27214.5	4.4348
23	mp	EBA175	subject	1A	C1	NA	Stock	Stock	37	Manual	37SSM	9325	3.96965
23	mp	LSA1	subject	1A	C1	NA	Stock	Stock	37	Manual	37SSM	14001	4.14616
23	mp	SSP2	subject	1A	C1	NA	Stock	Stock	37	Manual	37SSM	5791.5	3.76279
24	mp	PfRH5	subject	1A	C1	NA	Stock	Daily	37	Manual	37DSM	10735	4.0308
24	mp	Peptide VAR2CSA	subject	1A	C1	NA	Stock	Daily	37	Manual	37DSM	368.5	2.56644
24	mp	AMA1 FVO	subject	1A	C1	NA	Stock	Daily	37	Manual	37DSM	23092	4.36346
24	mp	MSP1_42 FVO	subject	1A	C1	NA	Stock	Daily	37	Manual	37DSM	24501	4.38918
24	mp	EBA175	subject	1A	C1	NA	Stock	Daily	37	Manual	37DSM	5223	3.71792
24	mp	LSA1	subject	1A	C1	NA	Stock	Daily	37	Manual	37DSM	5013	3.7001
24	mp	SSP2	subject	1A	C1	NA	Stock	Daily	37	Manual	37DSM	2746	3.4387
25	mp	PfRH5	subject	1A	C1	NA	Several	Daily	22	Automatic	22DCA	22707	4.35616
25	mp	Peptide VAR2CSA	subject	1A	C1	NA	Several	Daily	22	Automatic	22DCA	462	2.66464
25	mp	AMA1 FVO	subject	1A	C1	NA	Several	Daily	22	Automatic	22DCA	23697	4.37469
25	mp	MSP1_42 FVO	subject	1A	C1	NA	Several	Daily	22	Automatic	22DCA	21996.5	4.34235
25	mp	EBA175	subject	1A	C1	NA	Several	Daily	22	Automatic	22DCA	9733	3.98825
25	mp	LSA1	subject	1A	C1	NA	Several	Daily	22	Automatic	22DCA	1805	3.25648
25	mp	SSP2	subject	1A	C1	NA	Several	Daily	22	Automatic	22DCA	10118	4.00509
26	mp	MSP1_42 FVO	subject	1A	C1	NA	Stock	Daily	22	Manual	22DSM	16377.5	4.21425
26	mp	PfRH5	subject	1A	C1	NA	Stock	Daily	22	Manual	22DSM	14801.5	4.17031
26	mp	Peptide VAR2CSA	subject	1A	C1	NA	Stock	Daily	22	Manual	22DSM	389	2.58995
26	mp	AMA1 FVO	subject	1A	C1	NA	Stock	Daily	22	Manual	22DSM	15655	4.19465
26	mp	EBA175	subject	1A	C1	NA	Stock	Daily	22	Manual	22DSM	4691.5	3.67131
26	mp	LSA1	subject	1A	C1	NA	Stock	Daily	22	Manual	22DSM	2940	3.46835
26	mp	SSP2	subject	1A	C1	NA	Stock	Daily	22	Manual	22DSM	2967	3.47232
27	mp	MSP1_42 FVO	subject	1A	C1	NA	Several	Daily	37	Automatic	37DCA	24728	4.39319
27	mp	PfRH5	subject	1A	C1	NA	Several	Daily	37	Automatic	37DCA	20507.5	4.31191
27	mp	Peptide VAR2CSA	subject	1A	C1	NA	Several	Daily	37	Automatic	37DCA	618.5	2.79134
27	mp	AMA1 FVO	subject	1A	C1	NA	Several	Daily	37	Automatic	37DCA	24693	4.39257
27	mp	EBA175	subject	1A	C1	NA	Several	Daily	37	Automatic	37DCA	9493.5	3.97743
27	mp	LSA1	subject	1A	C1	NA	Several	Daily	37	Automatic	37DCA	1898	3.2783
27	mp	SSP2	subject	1A	C1	NA	Several	Daily	37	Automatic	37DCA	9223	3.96487
28	mp	MSP1_42 FVO	subject	1A	C1	NA	Several	Stock	37	Automatic	37SCA	26473.5	4.42281
28	mp	PfRH5	subject	1A	C1	NA	Several	Stock	37	Automatic	37SCA	18470.5	4.26648
28	mp	Peptide VAR2CSA	subject	1A	C1	NA	Several	Stock	37	Automatic	37SCA	546.5	2.73759
28	mp	AMA1 FVO	subject	1A	C1	NA	Several	Stock	37	Automatic	37SCA	26211.5	4.41849
28	mp	EBA175	subject	1A	C1	NA	Several	Stock	37	Automatic	37SCA	12070.5	4.08173
28	mp	LSA1	subject	1A	C1	NA	Several	Stock	37	Automatic	37SCA	1798	3.25479
28	mp	SSP2	subject	1A	C1	NA	Several	Stock	37	Automatic	37SCA	7614	3.88161
29	mp	MSP1_42 FVO	subject	1A	C1	NA	Stock	Daily	22	Manual	22DSM	24612	4.39115
29	mp	PfRH5	subject	1A	C1	NA	Stock	Daily	22	Manual	22DSM	24449.5	4.38827
29	mp	Peptide VAR2CSA	subject	1A	C1	NA	Stock	Daily	22	Manual	22DSM	1133.5	3.05442
29	mp	AMA1 FVO	subject	1A	C1	NA	Stock	Daily	22	Manual	22DSM	24437	4.38805
29	mp	EBA175	subject	1A	C1	NA	Stock	Daily	22	Manual	22DSM	11985	4.07864
29	mp	LSA1	subject	1A	C1	NA	Stock	Daily	22	Manual	22DSM	12968.5	4.11289
29	mp	SSP2	subject	1A	C1	NA	Stock	Daily	22	Manual	22DSM	10932	4.0387
30	mp	MSP1_42 FVO	subject	1A	C1	NA	Several	Daily	22	Manual	22DCM	9485.5	3.97706
30	mp	PfRH5	subject	1A	C1	NA	Several	Daily	22	Manual	22DCM	6329.5	3.80137
30	mp	Peptide VAR2CSA	subject	1A	C1	NA	Several	Daily	22	Manual	22DCM	125.5	2.09864
30	mp	AMA1 FVO	subject	1A	C1	NA	Several	Daily	22	Manual	22DCM	6519	3.81418
30	mp	EBA175	subject	1A	C1	NA	Several	Daily	22	Manual	22DCM	2414	3.38274
30	mp	LSA1	subject	1A	C1	NA	Several	Daily	22	Manual	22DCM	163	2.21219
30	mp	SSP2	subject	1A	C1	NA	Several	Daily	22	Manual	22DCM	1296	3.11261
31	mp	MSP1_42 FVO	subject	1A	C1	NA	Several	Stock	22	Manual	22SCM	24333	4.3862
31	mp	PfRH5	subject	1A	C1	NA	Several	Stock	22	Manual	22SCM	24414.5	4.38765
31	mp	Peptide VAR2CSA	subject	1A	C1	NA	Several	Stock	22	Manual	22SCM	320	2.50515
31	mp	AMA1 FVO	subject	1A	C1	NA	Several	Stock	22	Manual	22SCM	24108	4.38216
31	mp	EBA175	subject	1A	C1	NA	Several	Stock	22	Manual	22SCM	10744	4.03117
31	mp	LSA1	subject	1A	C1	NA	Several	Stock	22	Manual	22SCM	955.5	2.98023
31	mp	SSP2	subject	1A	C1	NA	Several	Stock	22	Manual	22SCM	9537	3.97941
32	mp	MSP1_42 FVO	subject	1A	C1	NA	Stock	Stock	37	Automatic	37SSA	23726.5	4.37523
32	mp	PfRH5	subject	1A	C1	NA	Stock	Stock	37	Automatic	37SSA	17912	4.25314
32	mp	Peptide VAR2CSA	subject	1A	C1	NA	Stock	Stock	37	Automatic	37SSA	562	2.74974
32	mp	AMA1 FVO	subject	1A	C1	NA	Stock	Stock	37	Automatic	37SSA	24060.5	4.3813
32	mp	EBA175	subject	1A	C1	NA	Stock	Stock	37	Automatic	37SSA	10800	4.03342
32	mp	LSA1	subject	1A	C1	NA	Stock	Stock	37	Automatic	37SSA	12568.5	4.09928
32	mp	SSP2	subject	1A	C1	NA	Stock	Stock	37	Automatic	37SSA	5319	3.72583
33	mp	MSP1_42 FVO	subject	1A	C1	NA	Stock	Stock	22	Manual	22SSM	24278	4.38521
33	mp	PfRH5	subject	1A	C1	NA	Stock	Stock	22	Manual	22SSM	24544.5	4.38995
33	mp	Peptide VAR2CSA	subject	1A	C1	NA	Stock	Stock	22	Manual	22SSM	797	2.90146
33	mp	AMA1 FVO	subject	1A	C1	NA	Stock	Stock	22	Manual	22SSM	24355	4.38659
33	mp	EBA175	subject	1A	C1	NA	Stock	Stock	22	Manual	22SSM	10960	4.03981
33	mp	LSA1	subject	1A	C1	NA	Stock	Stock	22	Manual	22SSM	10343	4.01465
33	mp	SSP2	subject	1A	C1	NA	Stock	Stock	22	Manual	22SSM	8965	3.95255
34	mp	MSP1_42 FVO	subject	1A	C1	NA	Stock	Daily	22	Automatic	22DSA	24423.5	4.38781
34	mp	PfRH5	subject	1A	C1	NA	Stock	Daily	22	Automatic	22DSA	24119	4.38236
34	mp	Peptide VAR2CSA	subject	1A	C1	NA	Stock	Daily	22	Automatic	22DSA	733	2.8651
34	mp	AMA1 FVO	subject	1A	C1	NA	Stock	Daily	22	Automatic	22DSA	24213	4.38405
34	mp	EBA175	subject	1A	C1	NA	Stock	Daily	22	Automatic	22DSA	11621	4.06524
34	mp	LSA1	subject	1A	C1	NA	Stock	Daily	22	Automatic	22DSA	12061	4.08138
34	mp	SSP2	subject	1A	C1	NA	Stock	Daily	22	Automatic	22DSA	9168	3.96227
35	mp	MSP1_42 FVO	subject	1A	C1	NA	Several	Daily	37	Manual	37DCM	26888.5	4.42957
35	mp	PfRH5	subject	1A	C1	NA	Several	Daily	37	Manual	37DCM	20240.5	4.30622
35	mp	Peptide VAR2CSA	subject	1A	C1	NA	Several	Daily	37	Manual	37DCM	493	2.69285
35	mp	AMA1 FVO	subject	1A	C1	NA	Several	Daily	37	Manual	37DCM	27113	4.43318
35	mp	EBA175	subject	1A	C1	NA	Several	Daily	37	Manual	37DCM	10930.5	4.03864
35	mp	LSA1	subject	1A	C1	NA	Several	Daily	37	Manual	37DCM	1532.5	3.1854
35	mp	SSP2	subject	1A	C1	NA	Several	Daily	37	Manual	37DCM	8142.5	3.91076
36	mp	MSP1_42 FVO	subject	1A	C1	NA	Several	Daily	22	Automatic	22DCA	23292.5	4.36722
36	mp	PfRH5	subject	1A	C1	NA	Several	Daily	22	Automatic	22DCA	23789	4.37638
36	mp	Peptide VAR2CSA	subject	1A	C1	NA	Several	Daily	22	Automatic	22DCA	262	2.4183
36	mp	AMA1 FVO	subject	1A	C1	NA	Several	Daily	22	Automatic	22DCA	20333	4.3082
36	mp	EBA175	subject	1A	C1	NA	Several	Daily	22	Automatic	22DCA	8046	3.90558
36	mp	LSA1	subject	1A	C1	NA	Several	Daily	22	Automatic	22DCA	802	2.90417
36	mp	SSP2	subject	1A	C1	NA	Several	Daily	22	Automatic	22DCA	6603	3.81974
37	mp	MSP1_42 FVO	subject	1A	C1	NA	Stock	Stock	37	Manual	37SSM	30065.5	4.47807
37	mp	PfRH5	subject	1A	C1	NA	Stock	Stock	37	Manual	37SSM	20116	4.30354
37	mp	Peptide VAR2CSA	subject	1A	C1	NA	Stock	Stock	37	Manual	37SSM	648	2.81158
37	mp	AMA1 FVO	subject	1A	C1	NA	Stock	Stock	37	Manual	37SSM	29568.5	4.47083
37	mp	EBA175	subject	1A	C1	NA	Stock	Stock	37	Manual	37SSM	10158	4.00681
37	mp	LSA1	subject	1A	C1	NA	Stock	Stock	37	Manual	37SSM	14609.5	4.16464
37	mp	SSP2	subject	1A	C1	NA	Stock	Stock	37	Manual	37SSM	5353	3.7286
38	mp	MSP1_42 FVO	subject	1A	C1	NA	Stock	Stock	37	Automatic	37SSA	30157.5	4.4794
38	mp	PfRH5	subject	1A	C1	NA	Stock	Stock	37	Automatic	37SSA	23831.5	4.37715
38	mp	Peptide VAR2CSA	subject	1A	C1	NA	Stock	Stock	37	Automatic	37SSA	692	2.84011
38	mp	AMA1 FVO	subject	1A	C1	NA	Stock	Stock	37	Automatic	37SSA	30041	4.47771
38	mp	EBA175	subject	1A	C1	NA	Stock	Stock	37	Automatic	37SSA	12763	4.10595
38	mp	LSA1	subject	1A	C1	NA	Stock	Stock	37	Automatic	37SSA	15941	4.20252
38	mp	SSP2	subject	1A	C1	NA	Stock	Stock	37	Automatic	37SSA	7515	3.87593
39	mp	PfRH5	subject	1A	C1	NA	Several	Stock	22	Manual	22SCM	26843	4.42883
39	mp	Peptide VAR2CSA	subject	1A	C1	NA	Several	Stock	22	Manual	22SCM	315	2.49831
39	mp	AMA1 FVO	subject	1A	C1	NA	Several	Stock	22	Manual	22SCM	26258	4.41926
39	mp	MSP1_42 FVO	subject	1A	C1	NA	Several	Stock	22	Manual	22SCM	26320.5	4.42029
39	mp	EBA175	subject	1A	C1	NA	Several	Stock	22	Manual	22SCM	10174.5	4.00751
39	mp	LSA1	subject	1A	C1	NA	Several	Stock	22	Manual	22SCM	1117	3.04805
39	mp	SSP2	subject	1A	C1	NA	Several	Stock	22	Manual	22SCM	9524.5	3.97884
40	mp	MSP1_42 FVO	subject	1A	C1	NA	Stock	Stock	22	Automatic	22SSA	24070	4.38148
40	mp	PfRH5	subject	1A	C1	NA	Stock	Stock	22	Automatic	22SSA	24362	4.38671
40	mp	Peptide VAR2CSA	subject	1A	C1	NA	Stock	Stock	22	Automatic	22SSA	620.5	2.79274
40	mp	AMA1 FVO	subject	1A	C1	NA	Stock	Stock	22	Automatic	22SSA	24560	4.39023
40	mp	EBA175	subject	1A	C1	NA	Stock	Stock	22	Automatic	22SSA	8317.5	3.91999
40	mp	LSA1	subject	1A	C1	NA	Stock	Stock	22	Automatic	22SSA	7930.5	3.8993
40	mp	SSP2	subject	1A	C1	NA	Stock	Stock	22	Automatic	22SSA	6216.5	3.79355
41	mp	MSP1_42 FVO	subject	1A	C1	NA	Several	Daily	37	Manual	37DCM	24116	4.38231
41	mp	PfRH5	subject	1A	C1	NA	Several	Daily	37	Manual	37DCM	13518.5	4.13093
41	mp	Peptide VAR2CSA	subject	1A	C1	NA	Several	Daily	37	Manual	37DCM	362	2.55871
41	mp	AMA1 FVO	subject	1A	C1	NA	Several	Daily	37	Manual	37DCM	23359	4.36845
41	mp	EBA175	subject	1A	C1	NA	Several	Daily	37	Manual	37DCM	6710	3.82672
41	mp	LSA1	subject	1A	C1	NA	Several	Daily	37	Manual	37DCM	978	2.99034
41	mp	SSP2	subject	1A	C1	NA	Several	Daily	37	Manual	37DCM	5141	3.71105
42	mp	MSP1_42 FVO	subject	1A	C1	NA	Several	Daily	22	Automatic	22DCA	28502	4.45488
42	mp	PfRH5	subject	1A	C1	NA	Several	Daily	22	Automatic	22DCA	27815.5	4.44429
42	mp	Peptide VAR2CSA	subject	1A	C1	NA	Several	Daily	22	Automatic	22DCA	537	2.72997
42	mp	AMA1 FVO	subject	1A	C1	NA	Several	Daily	22	Automatic	22DCA	28363.5	4.45276
42	mp	EBA175	subject	1A	C1	NA	Several	Daily	22	Automatic	22DCA	15450	4.18893
42	mp	LSA1	subject	1A	C1	NA	Several	Daily	22	Automatic	22DCA	2394	3.37912
42	mp	SSP2	subject	1A	C1	NA	Several	Daily	22	Automatic	22DCA	16036	4.2051
43	mp	AMA1 FVO	subject	1A	C1	NA	Stock	Daily	37	Automatic	37DSA	27345	4.43688
43	mp	PfRH5	subject	1A	C1	NA	Stock	Daily	37	Automatic	37DSA	23475	4.37061
43	mp	Peptide VAR2CSA	subject	1A	C1	NA	Stock	Daily	37	Automatic	37DSA	815.5	2.91142
43	mp	MSP1_42 FVO	subject	1A	C1	NA	Stock	Daily	37	Automatic	37DSA	28007.5	4.44727
43	mp	EBA175	subject	1A	C1	NA	Stock	Daily	37	Automatic	37DSA	9699	3.98673
43	mp	LSA1	subject	1A	C1	NA	Stock	Daily	37	Automatic	37DSA	17415.5	4.24094
43	mp	SSP2	subject	1A	C1	NA	Stock	Daily	37	Automatic	37DSA	6813	3.83334
44	mp	AMA1 FVO	subject	1A	C1	NA	Several	Stock	22	Automatic	22SCA	22982	4.36139
44	mp	LSA1	subject	1A	C1	NA	Several	Stock	22	Automatic	22SCA	12707	4.10404
44	mp	SSP2	subject	1A	C1	NA	Several	Stock	22	Automatic	22SCA	5217	3.71742
44	mp	PfRH5	subject	1A	C1	NA	Several	Stock	22	Automatic	22SCA	21334	4.32907
44	mp	Peptide VAR2CSA	subject	1A	C1	NA	Several	Stock	22	Automatic	22SCA	838.5	2.9235
44	mp	MSP1_42 FVO	subject	1A	C1	NA	Several	Stock	22	Automatic	22SCA	23434	4.36985
44	mp	EBA175	subject	1A	C1	NA	Several	Stock	22	Automatic	22SCA	8176	3.91254
45	mp	AMA1 FVO	subject	1A	C1	NA	Several	Stock	22	Automatic	22SCA	23982	4.37989
45	mp	LSA1	subject	1A	C1	NA	Several	Stock	22	Automatic	22SCA	17370	4.2398
45	mp	SSP2	subject	1A	C1	NA	Several	Stock	22	Automatic	22SCA	6744	3.82892
45	mp	PfRH5	subject	1A	C1	NA	Several	Stock	22	Automatic	22SCA	26218.5	4.41861
45	mp	Peptide VAR2CSA	subject	1A	C1	NA	Several	Stock	22	Automatic	22SCA	995	2.99782
45	mp	MSP1_42 FVO	subject	1A	C1	NA	Several	Stock	22	Automatic	22SCA	26993.5	4.43126
45	mp	EBA175	subject	1A	C1	NA	Several	Stock	22	Automatic	22SCA	9954	3.998
46	mp	AMA1 FVO	subject	1A	C1	NA	Stock	Daily	37	Manual	37DSM	17852	4.25169
46	mp	LSA1	subject	1A	C1	NA	Stock	Daily	37	Manual	37DSM	5178	3.71416
46	mp	SSP2	subject	1A	C1	NA	Stock	Daily	37	Manual	37DSM	2365	3.37383
46	mp	PfRH5	subject	1A	C1	NA	Stock	Daily	37	Manual	37DSM	11451	4.05884
46	mp	Peptide VAR2CSA	subject	1A	C1	NA	Stock	Daily	37	Manual	37DSM	276.5	2.4417
46	mp	MSP1_42 FVO	subject	1A	C1	NA	Stock	Daily	37	Manual	37DSM	23497	4.37101
46	mp	EBA175	subject	1A	C1	NA	Stock	Daily	37	Manual	37DSM	5181.5	3.71446
47	mp	AMA1 FVO	subject	1A	C1	NA	Several	Stock	37	Automatic	37SCA	22908	4.35999
47	mp	LSA1	subject	1A	C1	NA	Several	Stock	37	Automatic	37SCA	17898	4.2528
47	mp	SSP2	subject	1A	C1	NA	Several	Stock	37	Automatic	37SCA	3599	3.55618
47	mp	PfRH5	subject	1A	C1	NA	Several	Stock	37	Automatic	37SCA	15304	4.1848
47	mp	Peptide VAR2CSA	subject	1A	C1	NA	Several	Stock	37	Automatic	37SCA	652.5	2.81458
47	mp	MSP1_42 FVO	subject	1A	C1	NA	Several	Stock	37	Automatic	37SCA	24288	4.38539
47	mp	EBA175	subject	1A	C1	NA	Several	Stock	37	Automatic	37SCA	7565	3.87881
48	mp	AMA1 FVO	subject	1A	C1	NA	Stock	Daily	22	Manual	22DSM	14640	4.16554
48	mp	LSA1	subject	1A	C1	NA	Stock	Daily	22	Manual	22DSM	2581	3.41179
48	mp	SSP2	subject	1A	C1	NA	Stock	Daily	22	Manual	22DSM	2604	3.41564
48	mp	PfRH5	subject	1A	C1	NA	Stock	Daily	22	Manual	22DSM	13011	4.11431
48	mp	Peptide VAR2CSA	subject	1A	C1	NA	Stock	Daily	22	Manual	22DSM	276.5	2.4417
48	mp	MSP1_42 FVO	subject	1A	C1	NA	Stock	Daily	22	Manual	22DSM	15033	4.17705
48	mp	EBA175	subject	1A	C1	NA	Stock	Daily	22	Manual	22DSM	4321.5	3.63563
49	mp	AMA1 FVO	subject	1A	C1	NA	Stock	Stock	37	Automatic	37SSA	24968	4.39738
49	mp	LSA1	subject	1A	C1	NA	Stock	Stock	37	Automatic	37SSA	15801	4.19868
49	mp	SSP2	subject	1A	C1	NA	Stock	Stock	37	Automatic	37SSA	6533	3.81511
49	mp	PfRH5	subject	1A	C1	NA	Stock	Stock	37	Automatic	37SSA	20759	4.31721
49	mp	Peptide VAR2CSA	subject	1A	C1	NA	Stock	Stock	37	Automatic	37SSA	684	2.83506
49	mp	MSP1_42 FVO	subject	1A	C1	NA	Stock	Stock	37	Automatic	37SSA	25498.5	4.40651
49	mp	EBA175	subject	1A	C1	NA	Stock	Stock	37	Automatic	37SSA	9805	3.99145
50	mp	AMA1 FVO	subject	1A	C1	NA	Stock	Daily	37	Automatic	37DSA	26747.5	4.42728
50	mp	LSA1	subject	1A	C1	NA	Stock	Daily	37	Automatic	37DSA	18533	4.26795
50	mp	SSP2	subject	1A	C1	NA	Stock	Daily	37	Automatic	37DSA	9075.5	3.95787
50	mp	PfRH5	subject	1A	C1	NA	Stock	Daily	37	Automatic	37DSA	24490	4.38899
50	mp	Peptide VAR2CSA	subject	1A	C1	NA	Stock	Daily	37	Automatic	37DSA	1034.5	3.01473
50	mp	MSP1_42 FVO	subject	1A	C1	NA	Stock	Daily	37	Automatic	37DSA	27470.5	4.43887
50	mp	EBA175	subject	1A	C1	NA	Stock	Daily	37	Automatic	37DSA	13175	4.11975
51	mp	AMA1 FVO	subject	1A	C1	NA	Several	Stock	37	Manual	37SCM	24498	4.38913
51	mp	LSA1	subject	1A	C1	NA	Several	Stock	37	Manual	37SCM	21855.5	4.33956
51	mp	SSP2	subject	1A	C1	NA	Several	Stock	37	Manual	37SCM	4876	3.68806
51	mp	PfRH5	subject	1A	C1	NA	Several	Stock	37	Manual	37SCM	18084.5	4.25731
51	mp	Peptide VAR2CSA	subject	1A	C1	NA	Several	Stock	37	Manual	37SCM	777	2.89042
51	mp	MSP1_42 FVO	subject	1A	C1	NA	Several	Stock	37	Manual	37SCM	24817.5	4.39476
51	mp	EBA175	subject	1A	C1	NA	Several	Stock	37	Manual	37SCM	10060	4.0026
52	mp	AMA1 FVO	subject	1A	C1	NA	Stock	Stock	37	Manual	37SSM	29939	4.47624
52	mp	LSA1	subject	1A	C1	NA	Stock	Stock	37	Manual	37SSM	17055	4.23185
52	mp	SSP2	subject	1A	C1	NA	Stock	Stock	37	Manual	37SSM	8043	3.90542
52	mp	Peptide VAR2CSA	subject	1A	C1	NA	Stock	Stock	37	Manual	37SSM	700.5	2.84541
52	mp	EBA175	subject	1A	C1	NA	Stock	Stock	37	Manual	37SSM	15604	4.19324
52	mp	PfRH5	subject	1A	C1	NA	Stock	Stock	37	Manual	37SSM	20981.5	4.32184
52	mp	MSP1_42 FVO	subject	1A	C1	NA	Stock	Stock	37	Manual	37SSM	30526	4.48467
53	mp	AMA1 FVO	subject	1A	C1	NA	Several	Stock	37	Manual	37SCM	23836	4.37723
53	mp	LSA1	subject	1A	C1	NA	Several	Stock	37	Manual	37SCM	20687	4.3157
53	mp	SSP2	subject	1A	C1	NA	Several	Stock	37	Manual	37SCM	4877.5	3.6882
53	mp	PfRH5	subject	1A	C1	NA	Several	Stock	37	Manual	37SCM	17746.5	4.24911
53	mp	Peptide VAR2CSA	subject	1A	C1	NA	Several	Stock	37	Manual	37SCM	710	2.85126
53	mp	MSP1_42 FVO	subject	1A	C1	NA	Several	Stock	37	Manual	37SCM	24227	4.3843
53	mp	EBA175	subject	1A	C1	NA	Several	Stock	37	Manual	37SCM	9385	3.97243
54	mp	AMA1 FVO	subject	1A	C1	NA	Stock	Stock	22	Automatic	22SSA	24551	4.39007
54	mp	SSP2	subject	1A	C1	NA	Stock	Stock	22	Automatic	22SSA	9462	3.97598
54	mp	PfRH5	subject	1A	C1	NA	Stock	Stock	22	Automatic	22SSA	24401	4.38741
54	mp	Peptide VAR2CSA	subject	1A	C1	NA	Stock	Stock	22	Automatic	22SSA	857	2.93298
54	mp	MSP1_42 FVO	subject	1A	C1	NA	Stock	Stock	22	Automatic	22SSA	24957.5	4.3972
54	mp	EBA175	subject	1A	C1	NA	Stock	Stock	22	Automatic	22SSA	12394	4.09321
54	mp	LSA1	subject	1A	C1	NA	Stock	Stock	22	Automatic	22SSA	10708	4.02971
55	mp	AMA1 FVO	subject	1A	C1	NA	Stock	Daily	22	Manual	22DSM	24245	4.38462
55	mp	SSP2	subject	1A	C1	NA	Stock	Daily	22	Manual	22DSM	10311	4.0133
55	mp	PfRH5	subject	1A	C1	NA	Stock	Daily	22	Manual	22DSM	24690.5	4.39253
55	mp	Peptide VAR2CSA	subject	1A	C1	NA	Stock	Daily	22	Manual	22DSM	1168	3.06744
55	mp	MSP1_42 FVO	subject	1A	C1	NA	Stock	Daily	22	Manual	22DSM	24268	4.38503
55	mp	EBA175	subject	1A	C1	NA	Stock	Daily	22	Manual	22DSM	12125	4.08368
55	mp	LSA1	subject	1A	C1	NA	Stock	Daily	22	Manual	22DSM	10093.5	4.00404
56	mp	SSP2	subject	1A	C1	NA	Several	Stock	22	Manual	22SCM	899	2.95376
56	mp	EBA175	subject	1A	C1	NA	Several	Stock	22	Manual	22SCM	2136.5	3.3297
56	mp	PfRH5	subject	1A	C1	NA	Several	Stock	22	Manual	22SCM	5465.5	3.73763
56	mp	Peptide VAR2CSA	subject	1A	C1	NA	Several	Stock	22	Manual	22SCM	176.5	2.24674
56	mp	AMA1 FVO	subject	1A	C1	NA	Several	Stock	22	Manual	22SCM	7358	3.86676
56	mp	MSP1_42 FVO	subject	1A	C1	NA	Several	Stock	22	Manual	22SCM	7397	3.86906
56	mp	LSA1	subject	1A	C1	NA	Several	Stock	22	Manual	22SCM	1969	3.29425
57	mp	SSP2	subject	1A	C1	NA	Several	Daily	37	Automatic	37DCA	7494	3.87471
57	mp	EBA175	subject	1A	C1	NA	Several	Daily	37	Automatic	37DCA	12467	4.09576
57	mp	AMA1 FVO	subject	1A	C1	NA	Several	Daily	37	Automatic	37DCA	25743	4.41066
57	mp	PfRH5	subject	1A	C1	NA	Several	Daily	37	Automatic	37DCA	23653	4.37389
57	mp	Peptide VAR2CSA	subject	1A	C1	NA	Several	Daily	37	Automatic	37DCA	2555	3.40739
57	mp	MSP1_42 FVO	subject	1A	C1	NA	Several	Daily	37	Automatic	37DCA	26459	4.42257
57	mp	LSA1	subject	1A	C1	NA	Several	Daily	37	Automatic	37DCA	24383	4.38709
58	mp	Peptide VAR2CSA	subject	1A	C1	NA	Several	Daily	37	Automatic	37DCA	1155	3.06258
58	mp	SSP2	subject	1A	C1	NA	Several	Daily	37	Automatic	37DCA	4539	3.65696
58	mp	PfRH5	subject	1A	C1	NA	Several	Daily	37	Automatic	37DCA	15275.5	4.184
58	mp	AMA1 FVO	subject	1A	C1	NA	Several	Daily	37	Automatic	37DCA	23363	4.36853
58	mp	MSP1_42 FVO	subject	1A	C1	NA	Several	Daily	37	Automatic	37DCA	23703	4.3748
58	mp	EBA175	subject	1A	C1	NA	Several	Daily	37	Automatic	37DCA	8220	3.91487
58	mp	LSA1	subject	1A	C1	NA	Several	Daily	37	Automatic	37DCA	21890	4.34025
59	mp	Peptide VAR2CSA	subject	1A	C1	NA	Several	Daily	22	Manual	22DCM	3124	3.49471
59	mp	SSP2	subject	1A	C1	NA	Several	Daily	22	Manual	22DCM	12888	4.11019
59	mp	MSP1_42 FVO	subject	1A	C1	NA	Several	Daily	22	Manual	22DCM	26423.5	4.42199
59	mp	EBA175	subject	1A	C1	NA	Several	Daily	22	Manual	22DCM	16163	4.20852
59	mp	LSA1	subject	1A	C1	NA	Several	Daily	22	Manual	22DCM	23823.5	4.37701
59	mp	PfRH5	subject	1A	C1	NA	Several	Daily	22	Manual	22DCM	25913	4.41352
59	mp	AMA1 FVO	subject	1A	C1	NA	Several	Daily	22	Manual	22DCM	26480	4.42292
60	mp	Peptide VAR2CSA	subject	1A	C1	NA	Several	Daily	37	Manual	37DCM	260	2.41497
60	mp	AMA1 FVO	subject	1A	C1	NA	Several	Daily	37	Manual	37DCM	13731	4.1377
60	mp	MSP1_42 FVO	subject	1A	C1	NA	Several	Daily	37	Manual	37DCM	18404	4.26491
60	mp	EBA175	subject	1A	C1	NA	Several	Daily	37	Manual	37DCM	3208.5	3.5063
60	mp	LSA1	subject	1A	C1	NA	Several	Daily	37	Manual	37DCM	11140	4.04689
60	mp	SSP2	subject	1A	C1	NA	Several	Daily	37	Manual	37DCM	1001	3.00043
60	mp	PfRH5	subject	1A	C1	NA	Several	Daily	37	Manual	37DCM	7970.5	3.90149
61	mp	Peptide VAR2CSA	subject	1A	C1	NA	Several	Stock	37	Automatic	37SCA	873	2.94101
61	mp	AMA1 FVO	subject	1A	C1	NA	Several	Stock	37	Automatic	37SCA	24676	4.39227
61	mp	MSP1_42 FVO	subject	1A	C1	NA	Several	Stock	37	Automatic	37SCA	24882	4.39589
61	mp	EBA175	subject	1A	C1	NA	Several	Stock	37	Automatic	37SCA	11846.5	4.07359
61	mp	LSA1	subject	1A	C1	NA	Several	Stock	37	Automatic	37SCA	23881.5	4.37806
61	mp	SSP2	subject	1A	C1	NA	Several	Stock	37	Automatic	37SCA	6626	3.82125
61	mp	PfRH5	subject	1A	C1	NA	Several	Stock	37	Automatic	37SCA	20662	4.31517
62	mp	PfRH5	subject	1A	C1	NA	Several	Daily	22	Manual	22DCM	14613	4.16474
62	mp	Peptide VAR2CSA	subject	1A	C1	NA	Several	Daily	22	Manual	22DCM	520	2.716
62	mp	AMA1 FVO	subject	1A	C1	NA	Several	Daily	22	Manual	22DCM	14832	4.1712
62	mp	MSP1_42 FVO	subject	1A	C1	NA	Several	Daily	22	Manual	22DCM	17368.5	4.23976
62	mp	EBA175	subject	1A	C1	NA	Several	Daily	22	Manual	22DCM	5768	3.76103
62	mp	LSA1	subject	1A	C1	NA	Several	Daily	22	Manual	22DCM	6577	3.81803
62	mp	SSP2	subject	1A	C1	NA	Several	Daily	22	Manual	22DCM	3034	3.48202
63	mp	PfRH5	subject	1A	C1	NA	Several	Stock	22	Manual	22SCM	21433	4.33108
63	mp	Peptide VAR2CSA	subject	1A	C1	NA	Several	Stock	22	Manual	22SCM	595	2.77452
63	mp	EBA175	subject	1A	C1	NA	Several	Stock	22	Manual	22SCM	7297	3.86314
63	mp	MSP1_42 FVO	subject	1A	C1	NA	Several	Stock	22	Manual	22SCM	20883	4.31979
63	mp	SSP2	subject	1A	C1	NA	Several	Stock	22	Manual	22SCM	4667.5	3.66908
63	mp	AMA1 FVO	subject	1A	C1	NA	Several	Stock	22	Manual	22SCM	23175	4.36502
63	mp	LSA1	subject	1A	C1	NA	Several	Stock	22	Manual	22SCM	17187	4.2352
64	mp	PfRH5	subject	1A	C1	NA	Several	Daily	22	Automatic	22DCA	24208	4.38396
64	mp	SSP2	subject	1A	C1	NA	Several	Daily	22	Automatic	22DCA	9164	3.96209
64	mp	AMA1 FVO	subject	1A	C1	NA	Several	Daily	22	Automatic	22DCA	24267	4.38502
64	mp	MSP1_42 FVO	subject	1A	C1	NA	Several	Daily	22	Automatic	22DCA	23758	4.37581
64	mp	Peptide VAR2CSA	subject	1A	C1	NA	Several	Daily	22	Automatic	22DCA	1806	3.25672
64	mp	EBA175	subject	1A	C1	NA	Several	Daily	22	Automatic	22DCA	11317	4.05373
64	mp	LSA1	subject	1A	C1	NA	Several	Daily	22	Automatic	22DCA	23781	4.37623
1	mp	PfRH5	subject	3A	C10	NA	Stock	Daily	22	Automatic	22DSA	219.5	2.34143
1	mp	Peptide VAR2CSA	subject	3A	C10	NA	Stock	Daily	22	Automatic	22DSA	252	2.4014
1	mp	AMA1 FVO	subject	3A	C10	NA	Stock	Daily	22	Automatic	22DSA	2616	3.41764
1	mp	MSP1_42 FVO	subject	3A	C10	NA	Stock	Daily	22	Automatic	22DSA	191	2.28103
1	mp	EBA175	subject	3A	C10	NA	Stock	Daily	22	Automatic	22DSA	2652	3.42357
1	mp	LSA1	subject	3A	C10	NA	Stock	Daily	22	Automatic	22DSA	72	1.85733
1	mp	SSP2	subject	3A	C10	NA	Stock	Daily	22	Automatic	22DSA	123.5	2.09167
2	mp	PfRH5	subject	3A	C10	NA	Stock	Stock	22	Automatic	22SSA	274	2.43775
2	mp	Peptide VAR2CSA	subject	3A	C10	NA	Stock	Stock	22	Automatic	22SSA	278	2.44404
2	mp	AMA1 FVO	subject	3A	C10	NA	Stock	Stock	22	Automatic	22SSA	2997	3.47669
2	mp	MSP1_42 FVO	subject	3A	C10	NA	Stock	Stock	22	Automatic	22SSA	236	2.37291
2	mp	EBA175	subject	3A	C10	NA	Stock	Stock	22	Automatic	22SSA	2897	3.46195
2	mp	LSA1	subject	3A	C10	NA	Stock	Stock	22	Automatic	22SSA	76	1.88081
2	mp	SSP2	subject	3A	C10	NA	Stock	Stock	22	Automatic	22SSA	158	2.19866
3	mp	AMA1 FVO	subject	3A	C10	NA	Stock	Stock	37	Automatic	37SSA	4226	3.62593
[truncated: 30,561 more rows]
