# Supplementary material
Source: publisher figshare collection journal article supplement (https://plos.figshare.com/articles/dataset/_/6731846)
Supplement: Supplementary file 1 [file 1 › pone.0199278.s003.pdf]

|   | 1           | 2           | 3           | 4           | 5           | 6           | 7           | 8           | 9           | 10      | 11      | 12      |                                 |
|---|-------------|-------------|-------------|-------------|-------------|-------------|-------------|-------------|-------------|---------|---------|---------|---------------------------------|
| A | Std_01A     | Std_02A     | Std_03B     | Std_05A     | Std_06A     | Std_07B     | Std_09A     | Std_10A     | Std_11B     | Std_13A | Std_14A | Std_15B | Singleplex Standard Curve (Std) |
| B | Std_01B     | Std_03A     | Std_04A     | Std_05B     | Std_07A     | Std_08A     | Std_09B     | Std_11A     | Std_12A     | Std_13B | Std_15A | Std_16A | Subject samples (M1-M9)         |
| C | M1_1A       | M1_1B       | M1_2A       | M1_3A       | M1_3B       | M1_4A       | M5_1A       | M5_2A       | M5_2B       | M5_3A   | M5_4A   | M5_4B   | Blanks                          |
| D | M2_1A       | M2_1B       | M2_2A       | M2_3A       | M2_3B       | M2_4A       | M6_1A       | M6_2A       | M6_2B       | M6_3A   | M6_4A   | M6_4B   | Positive Control (PosCtrl)      |
| E | M3_1A       | M3_1B       | M3_2A       | M3_3A       | M3_3B       | M3_4A       | M7_1A       | M7_2A       | M7_2B       | M7_3A   | M7_4A   | M7_4B   |                                 |
| F | M4_1A       | M4_1B       | M4_2A       | M4_3A       | M4_3B       | M4_4A       | M8_1A       | M8_2A       | M8_2B       | M8_3A   | M8_4A   | M8_4B   |                                 |
| G | Blank_1     | Blank_2     | Blank_3     | PosCtrl_02A | PosCtrl_04A | PosCtrl_06A | M9_1A       | M9_2A       | M9_2B       | M9_3A   | M9_4A   | M9_4B   |                                 |
| H | PosCtrl_01A | PosCtrl_01B | PosCtrl_03A | PosCtrl_03B | PosCtrl_05A | PosCtrl_05B | PosCtrl_07A | PosCtrl_07B | PosCtrl_08A |         |         |         |                                 |
