# Supplementary material
Source: publisher figshare collection journal article supplement (https://plos.figshare.com/articles/dataset/_/6731846)

# Positive control dilution: AMA-1

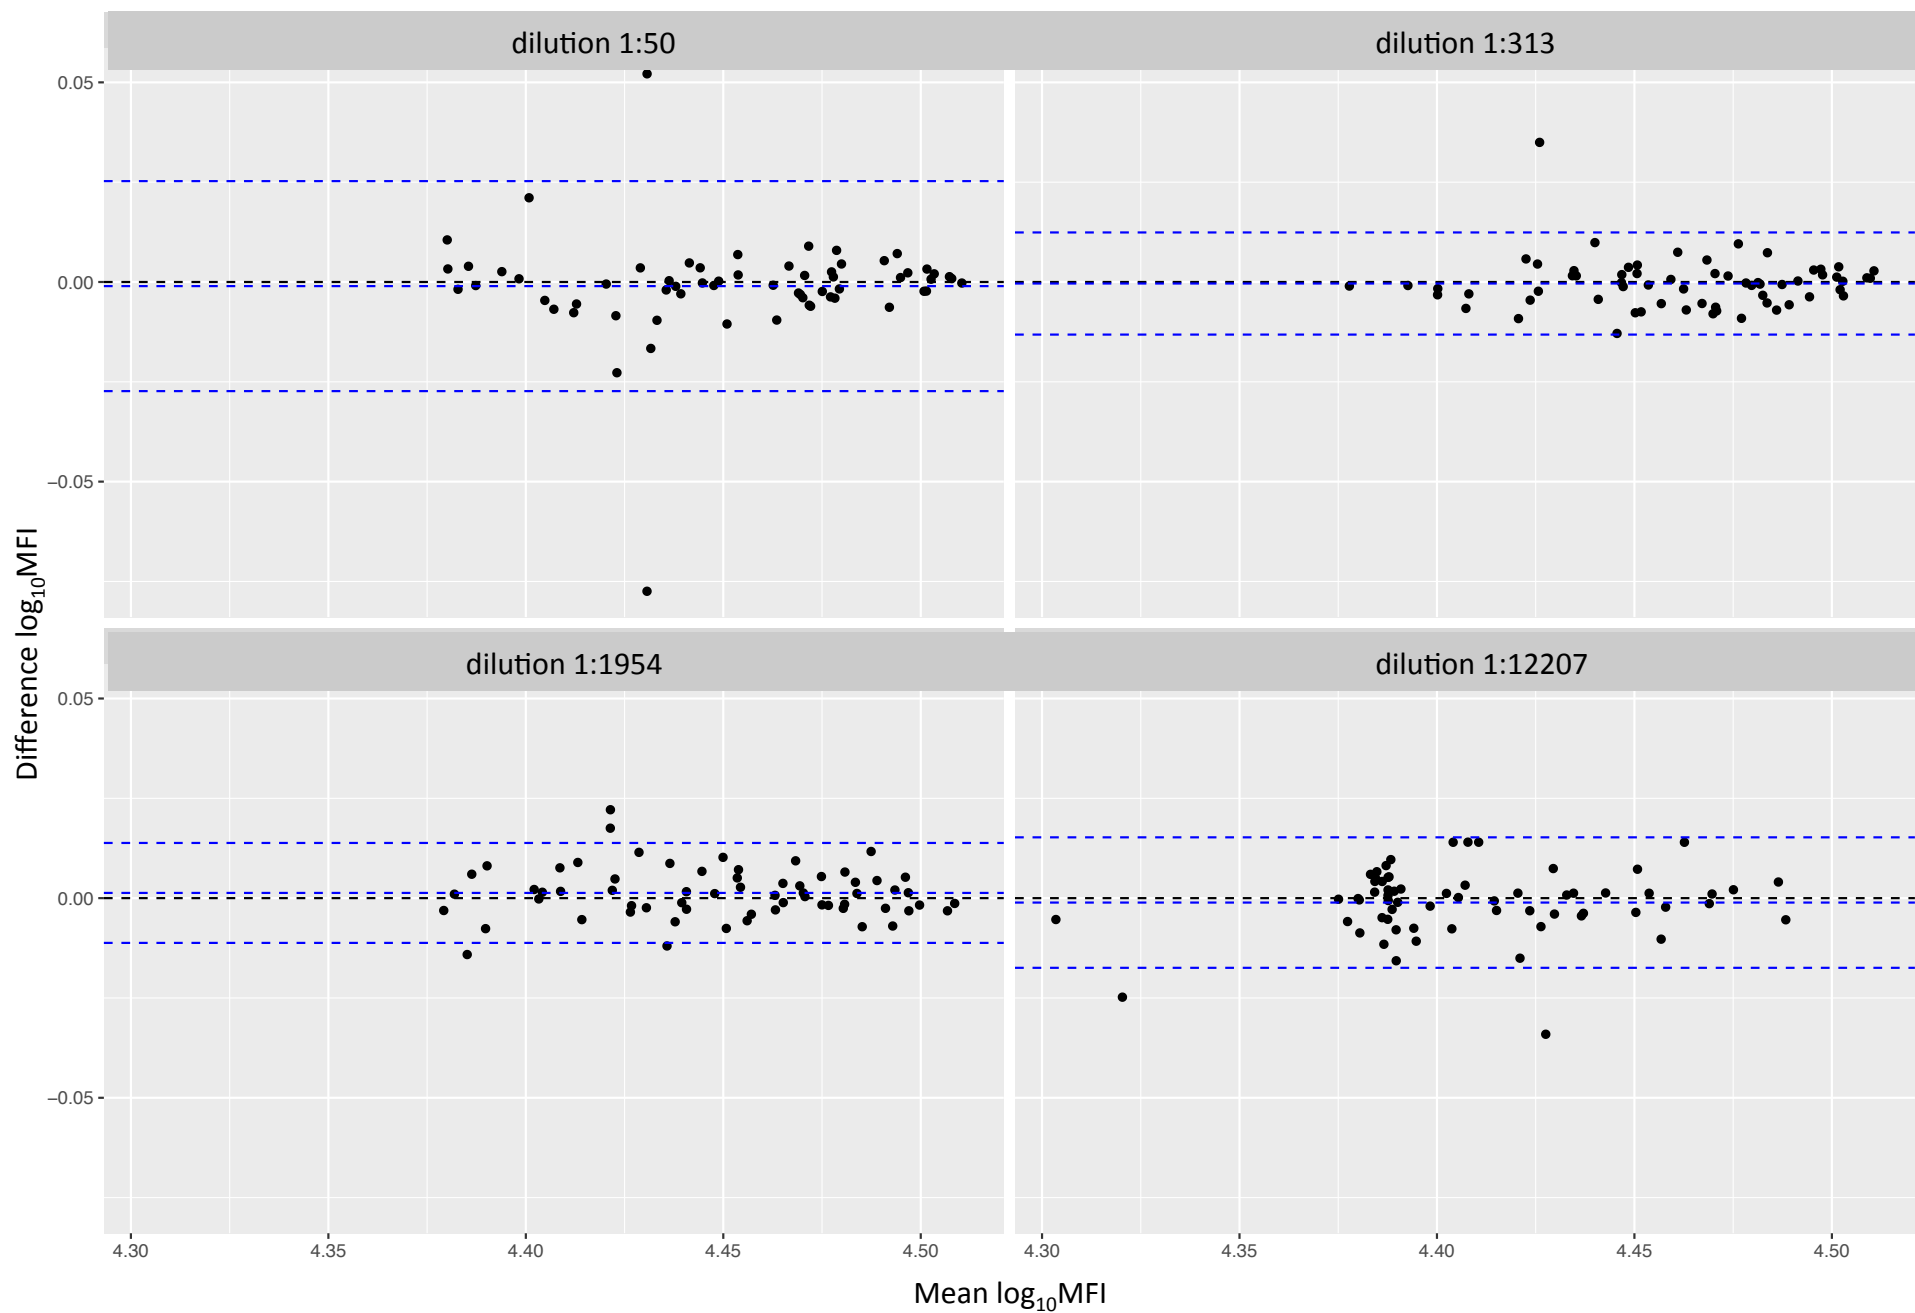

# Positive control dilution: MSP-1<sub>42</sub>

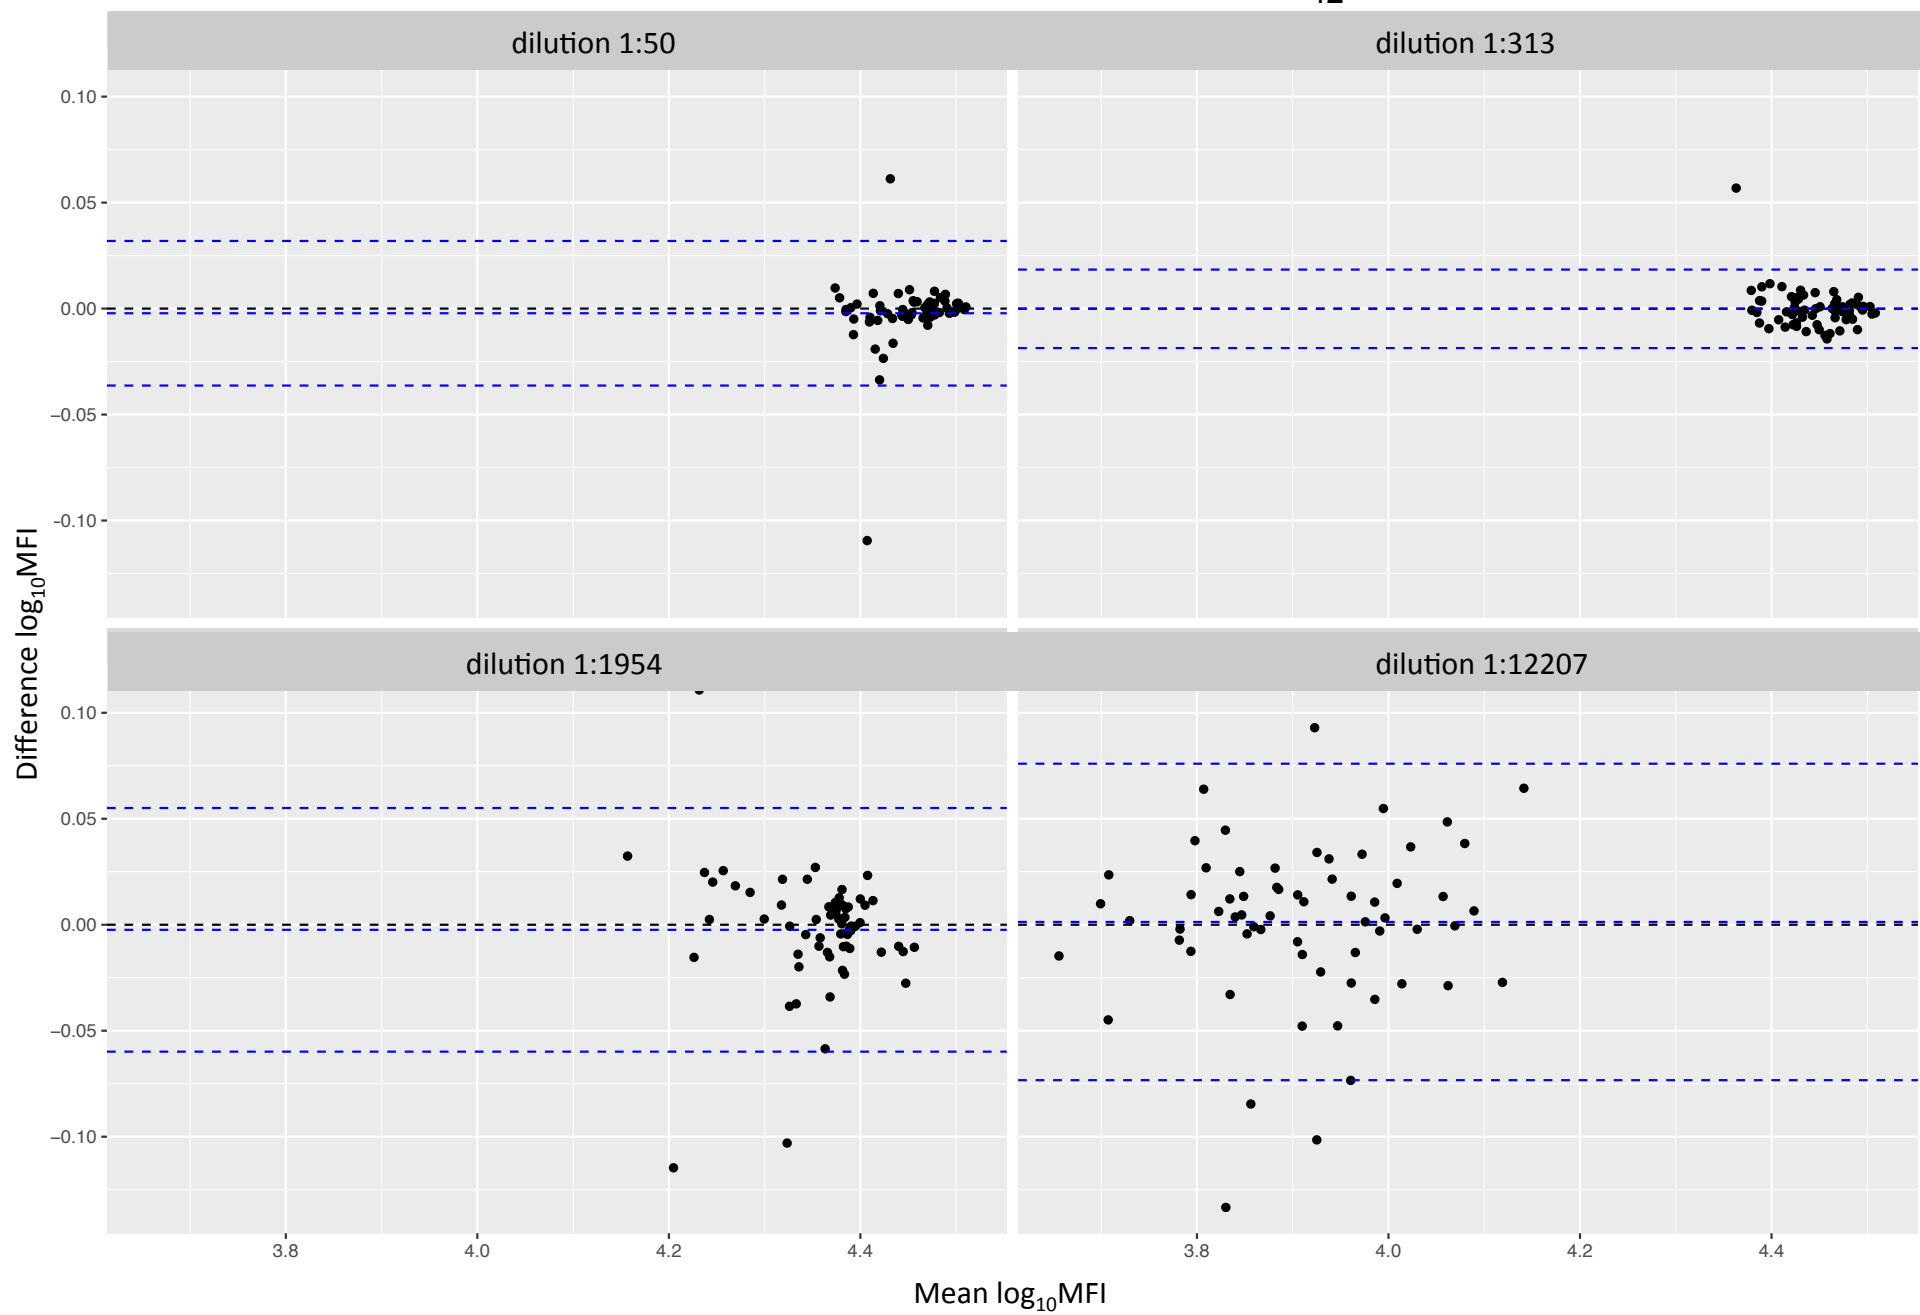

# Positive control dilution: EBA-175

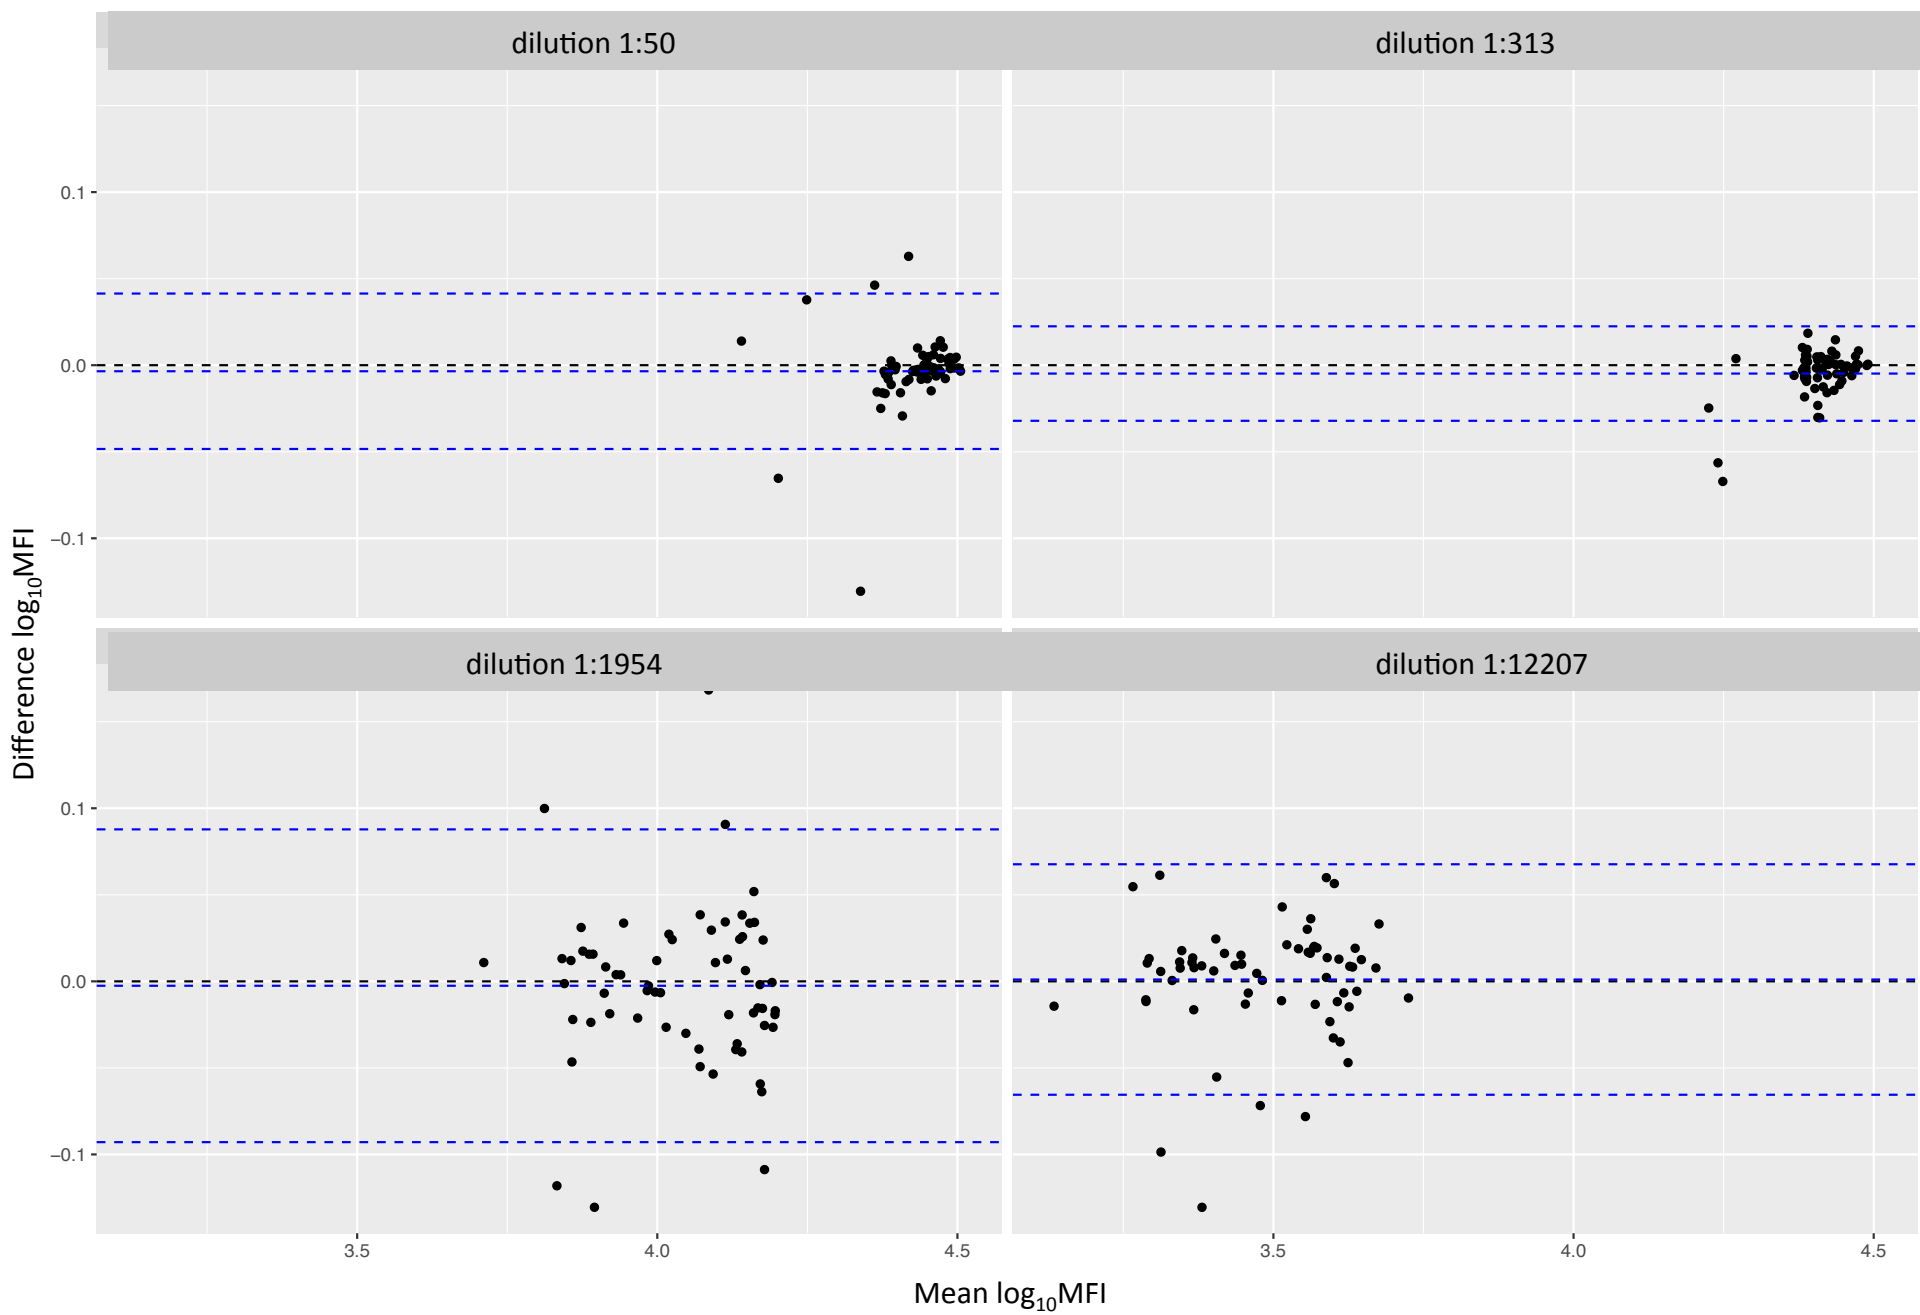

# Positive control dilution: RH5

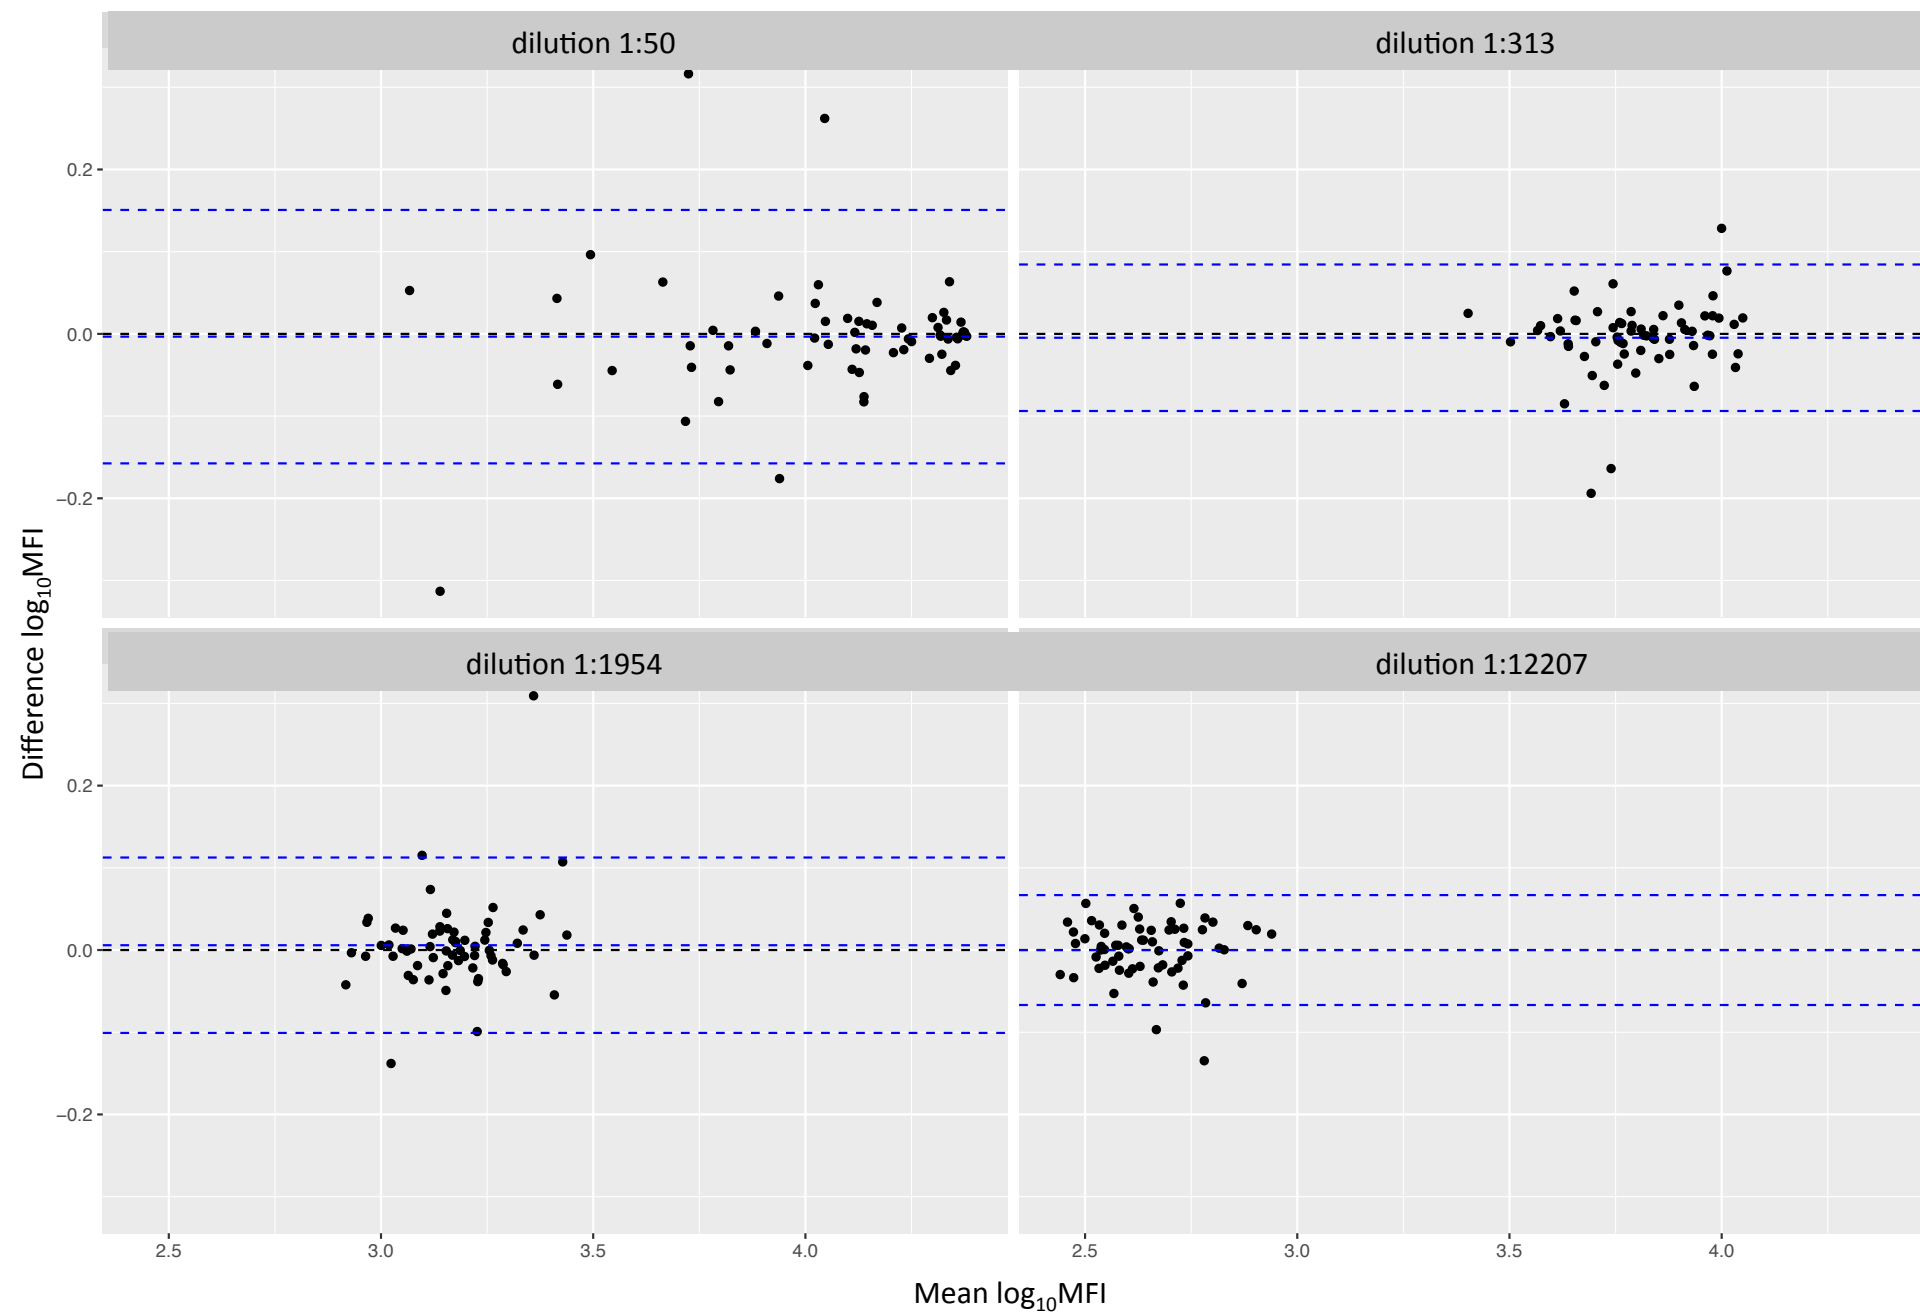

# Positive control dilution: LSA-1

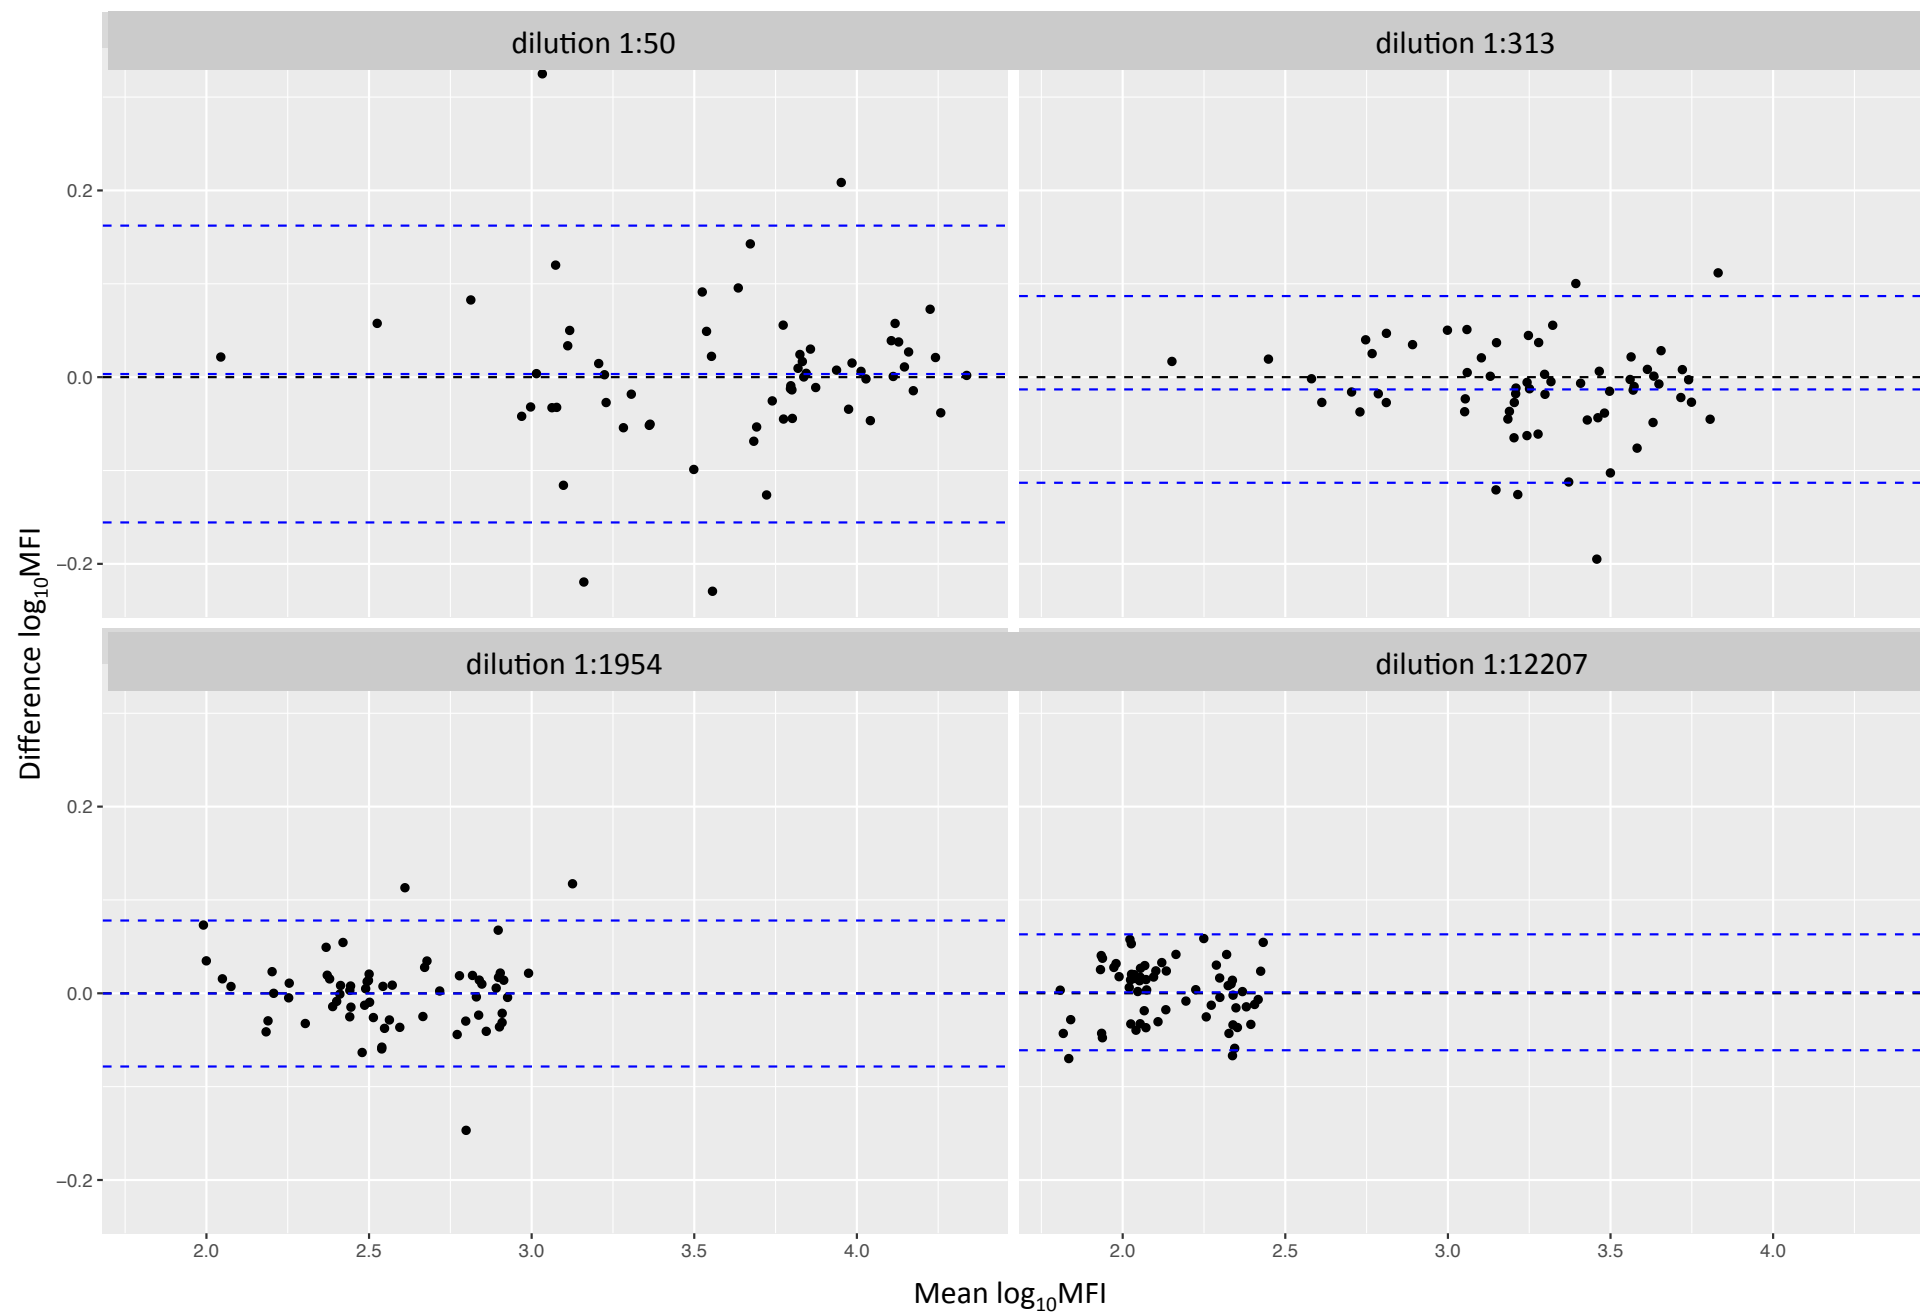

# Positive control dilution: SSP2

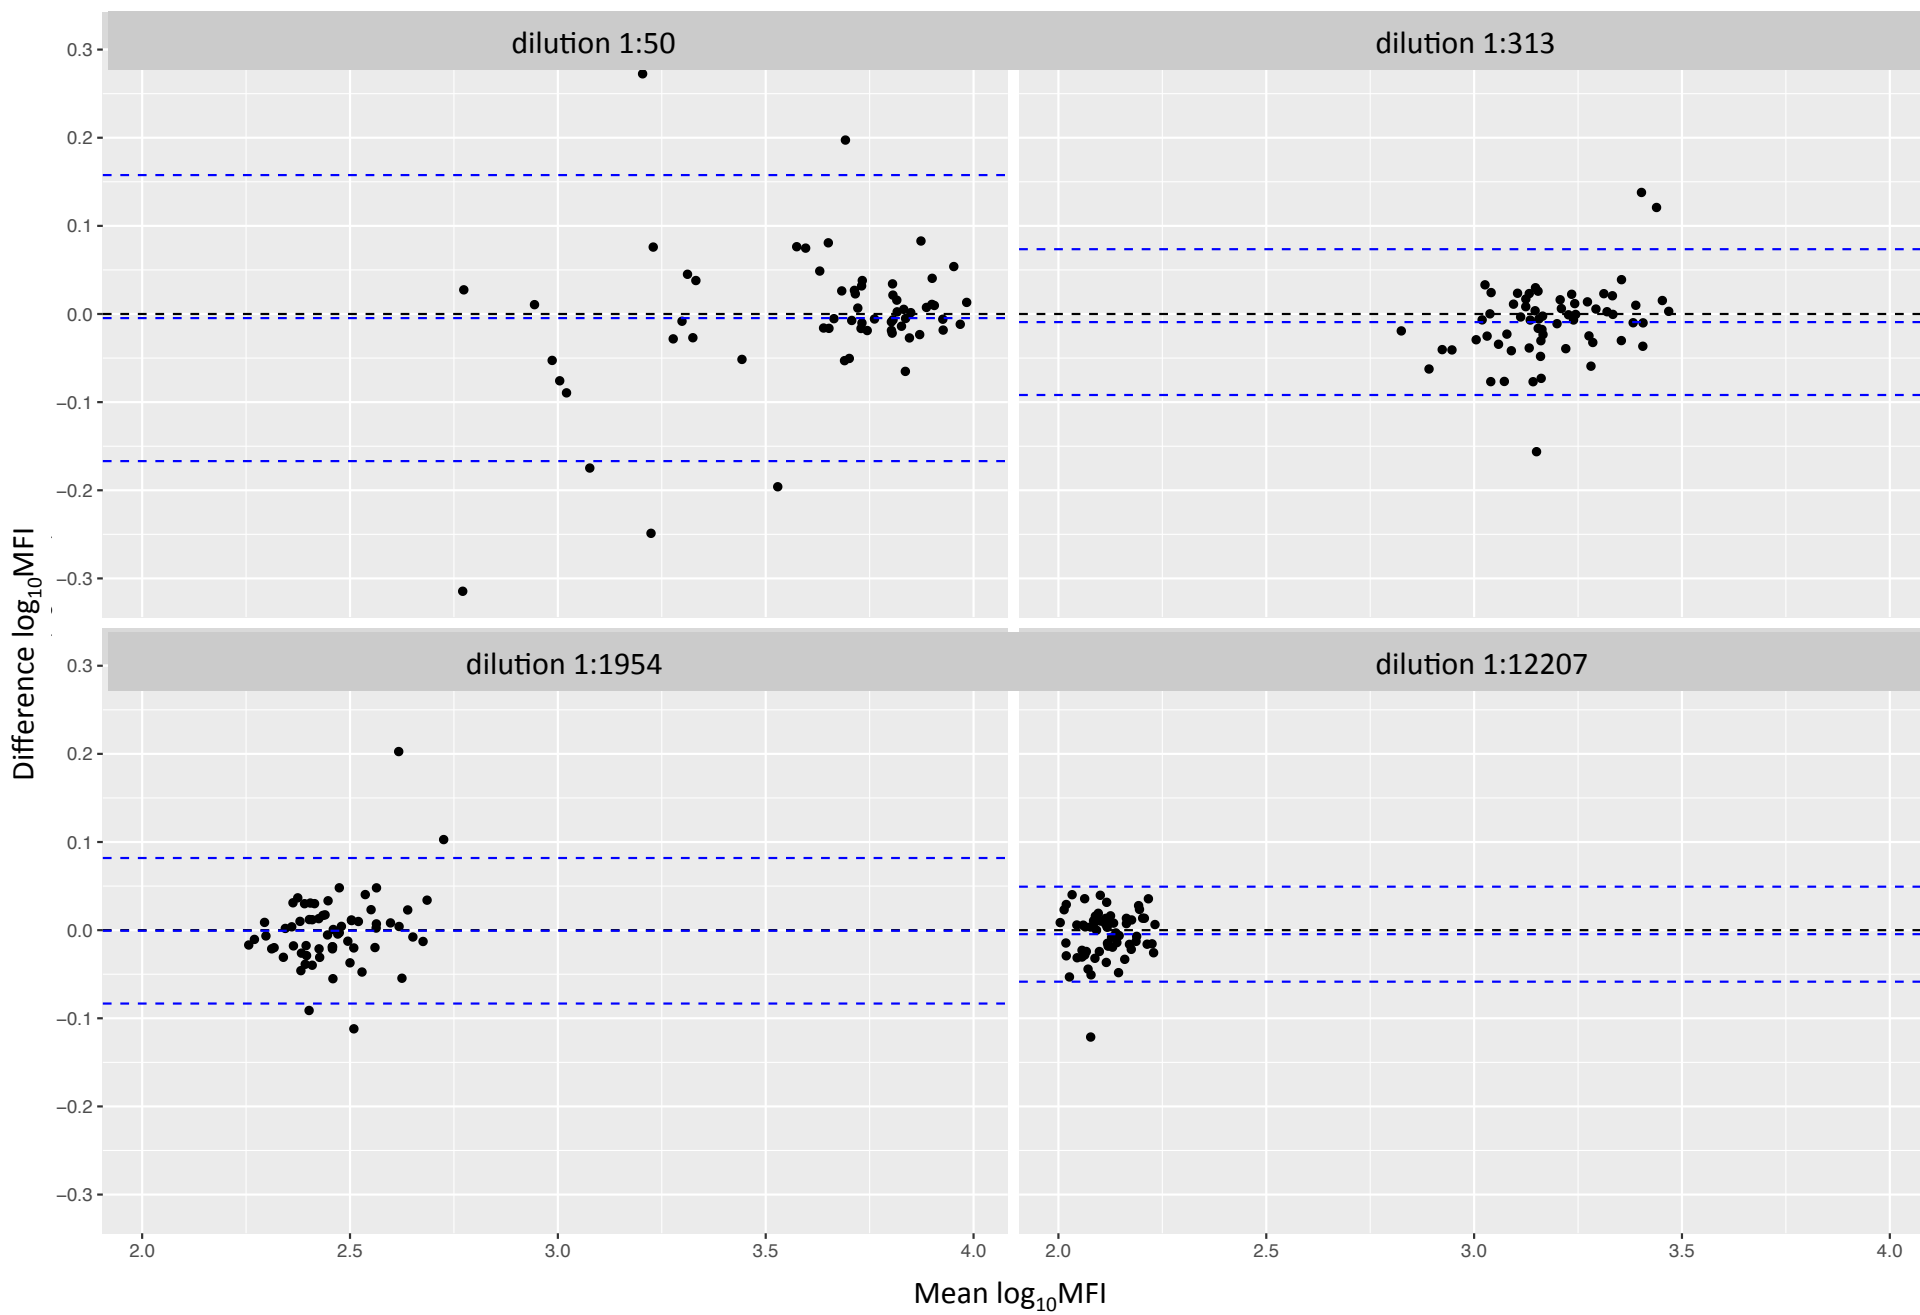

# Positive control dilution: VAR2CSA

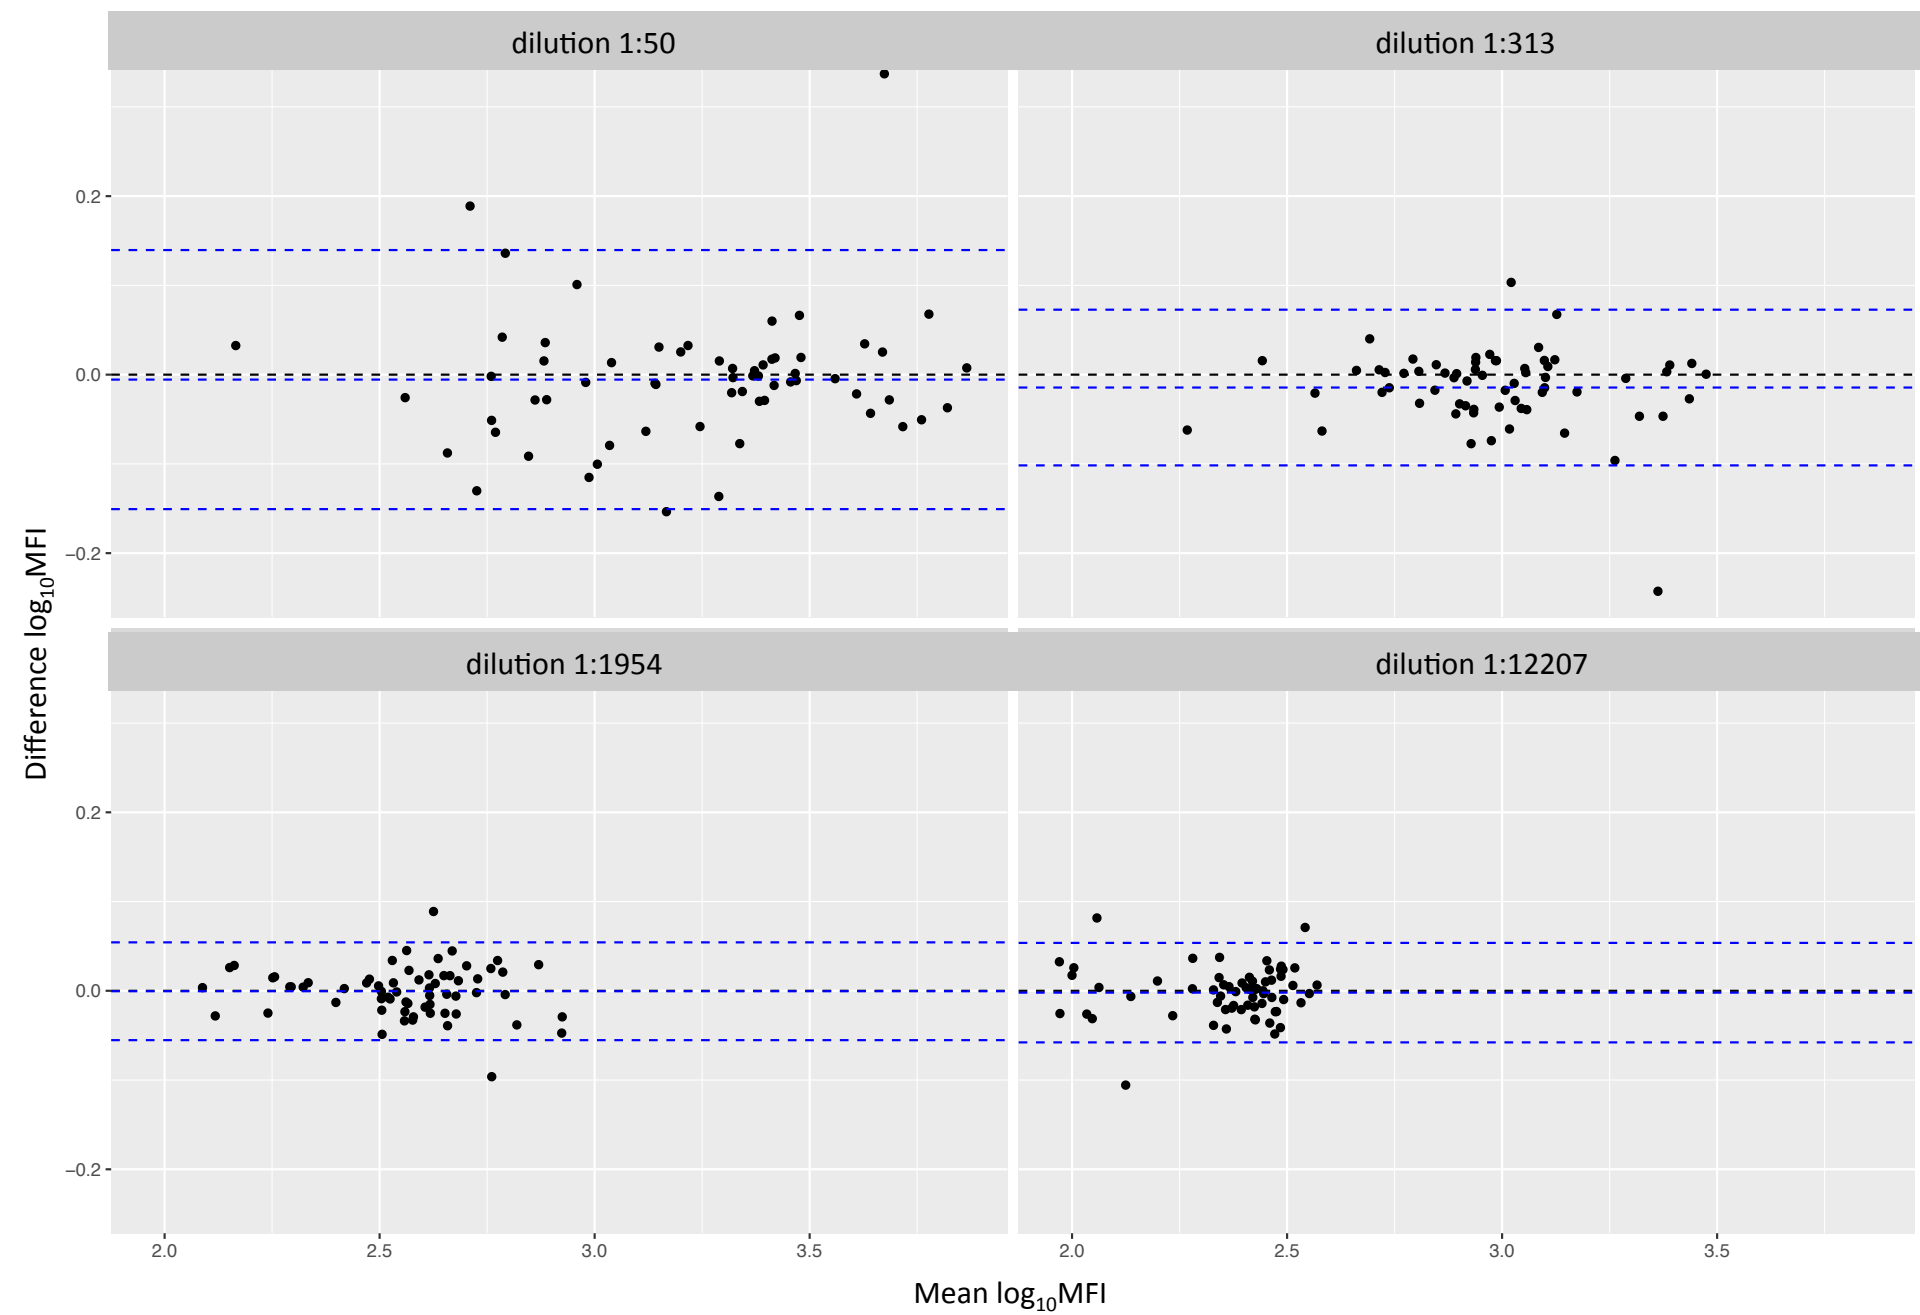

Supplement: Supplementary file 1 [file 1 › pone.0199278.s006.pdf]
