# Supplementary material
Source: publisher figshare collection journal article supplement (https://plos.figshare.com/articles/dataset/_/6731846)

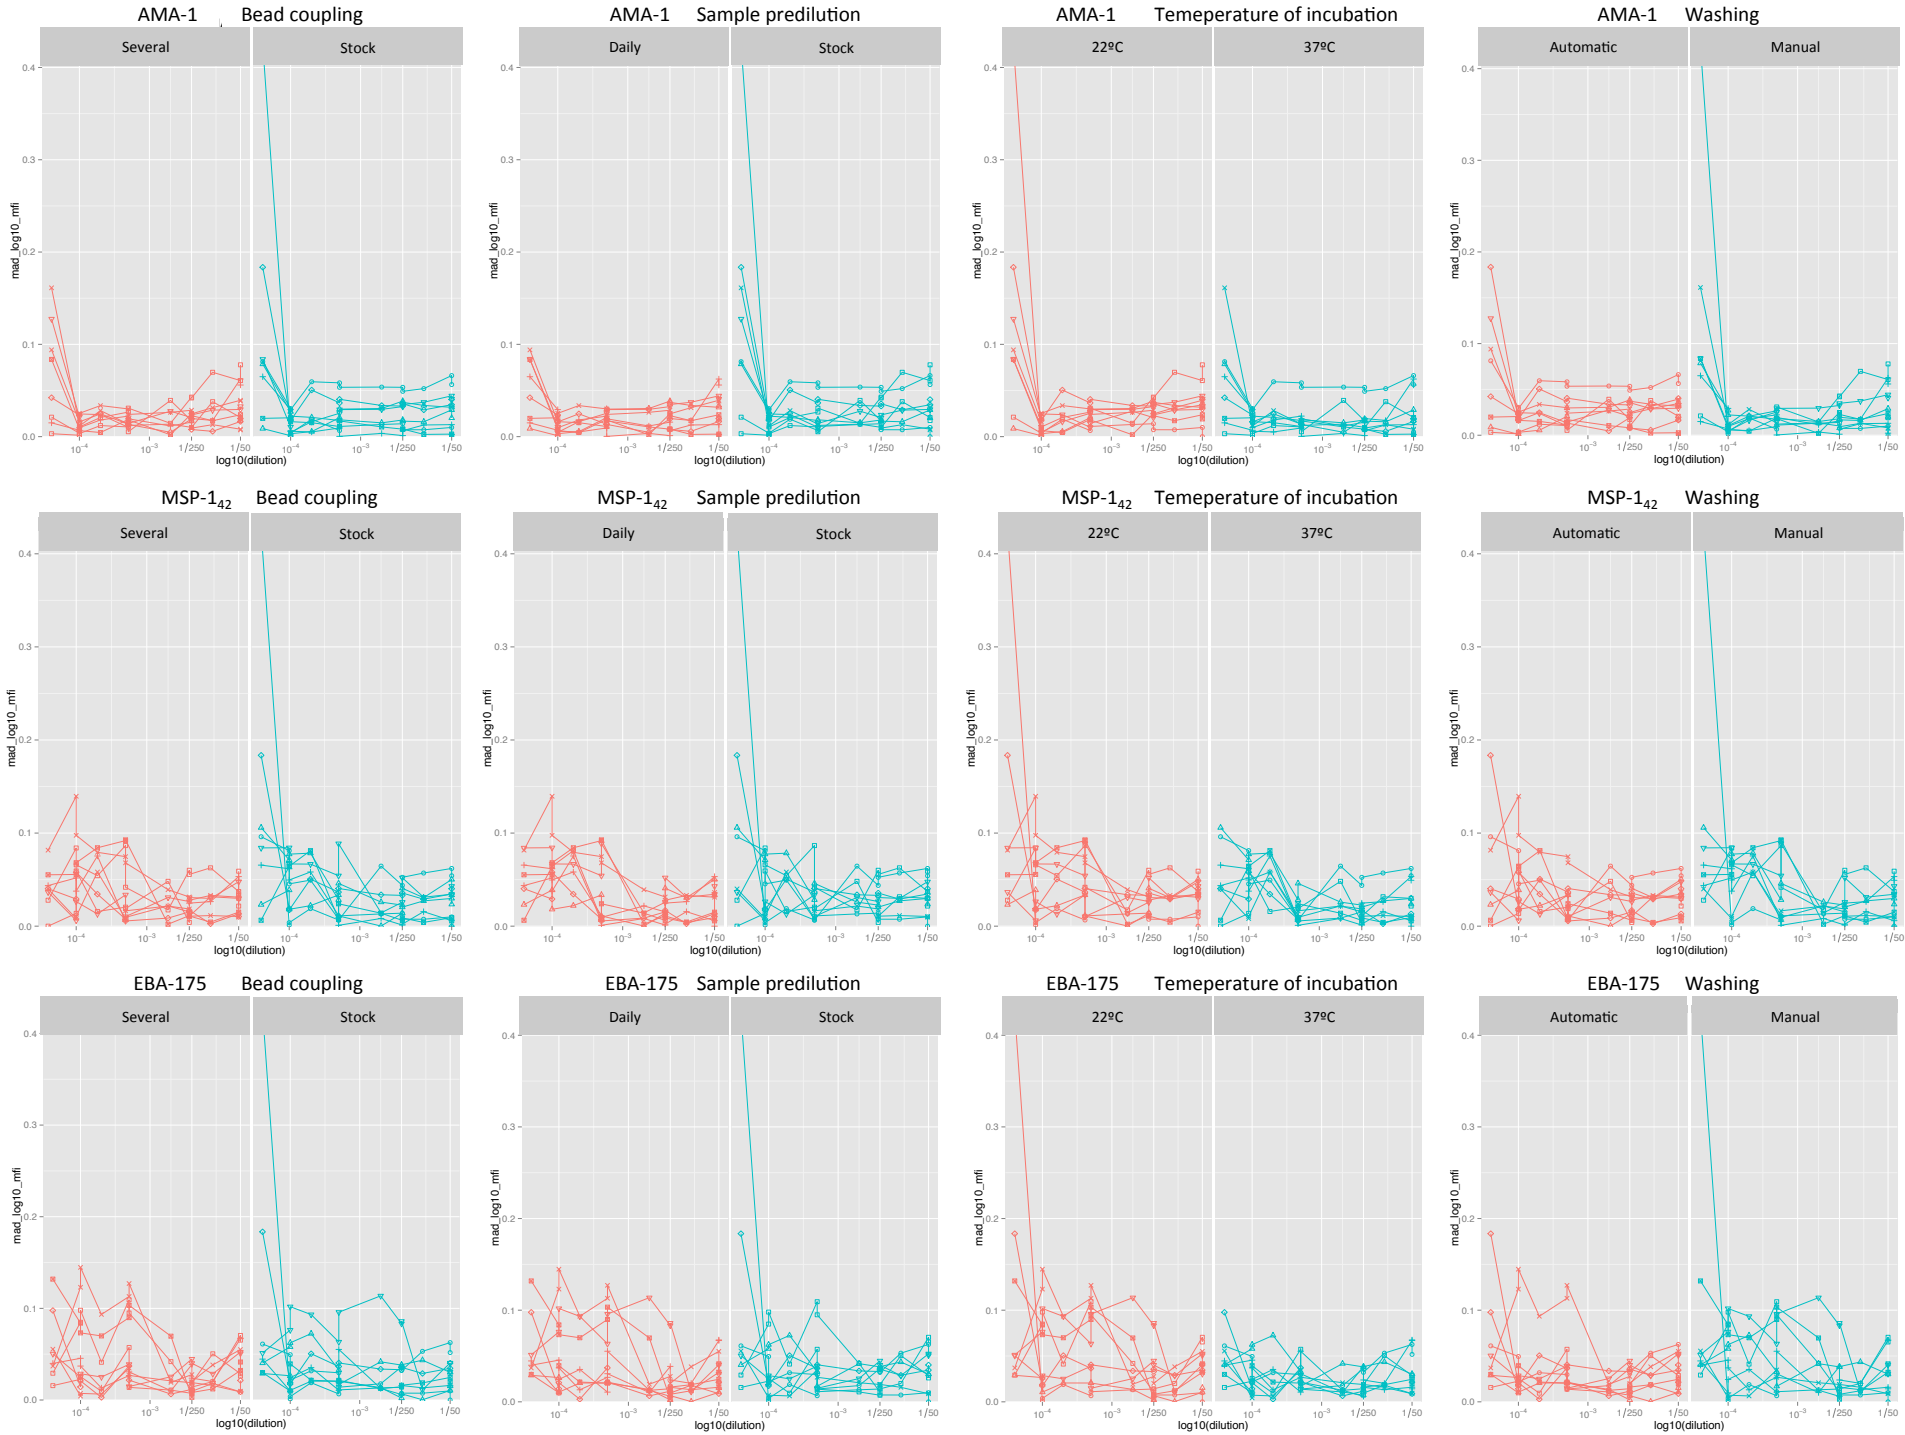

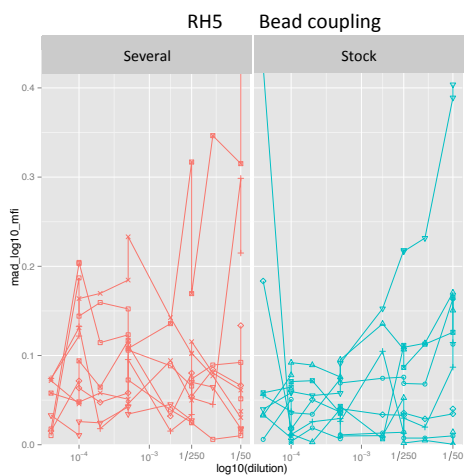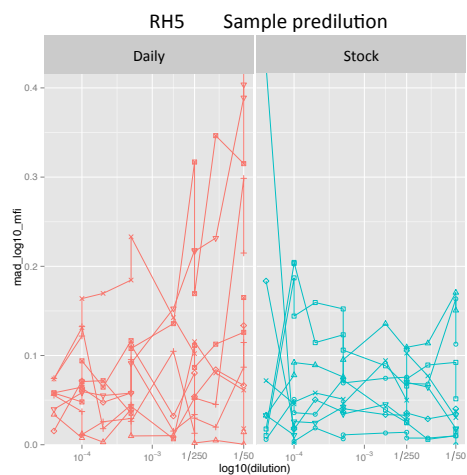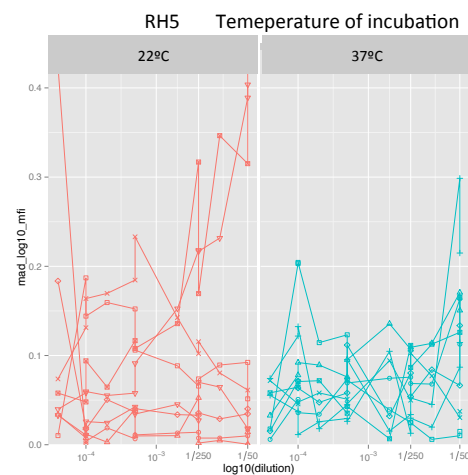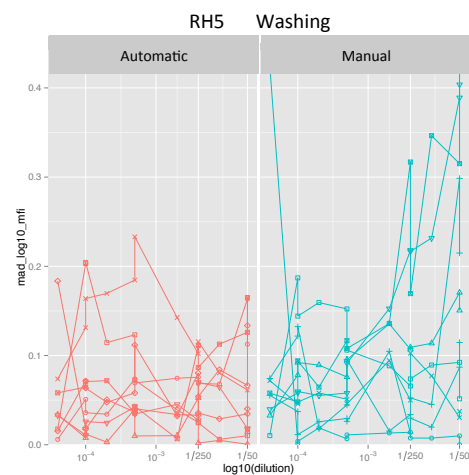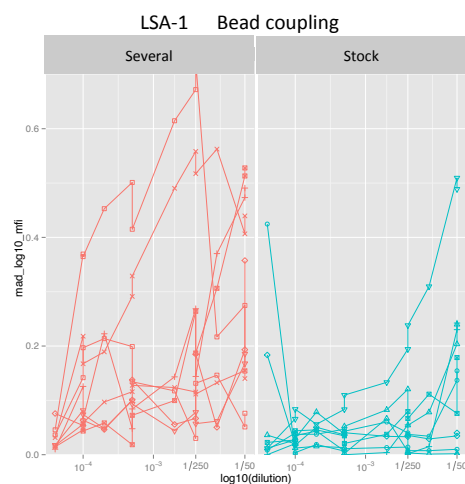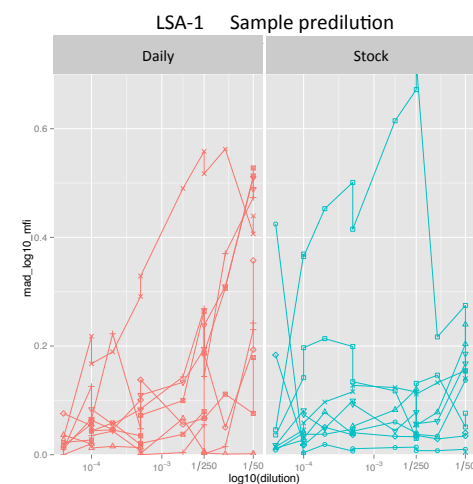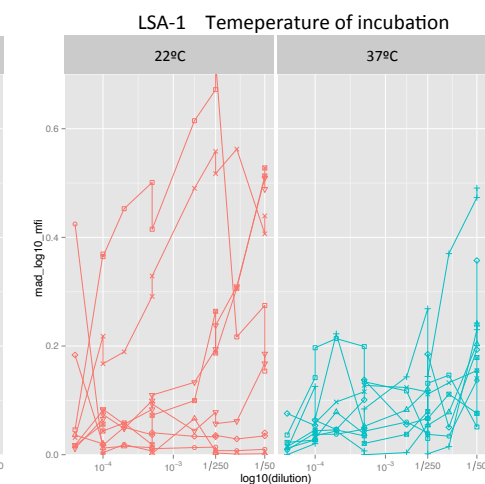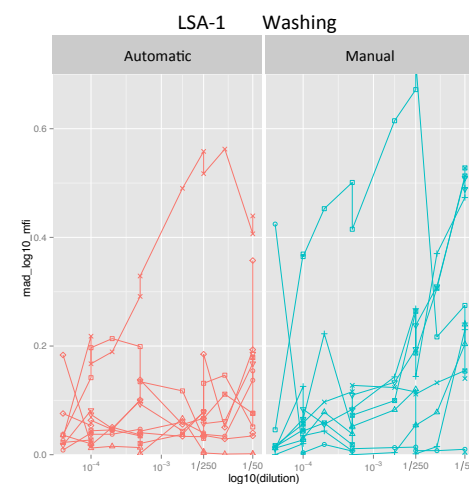

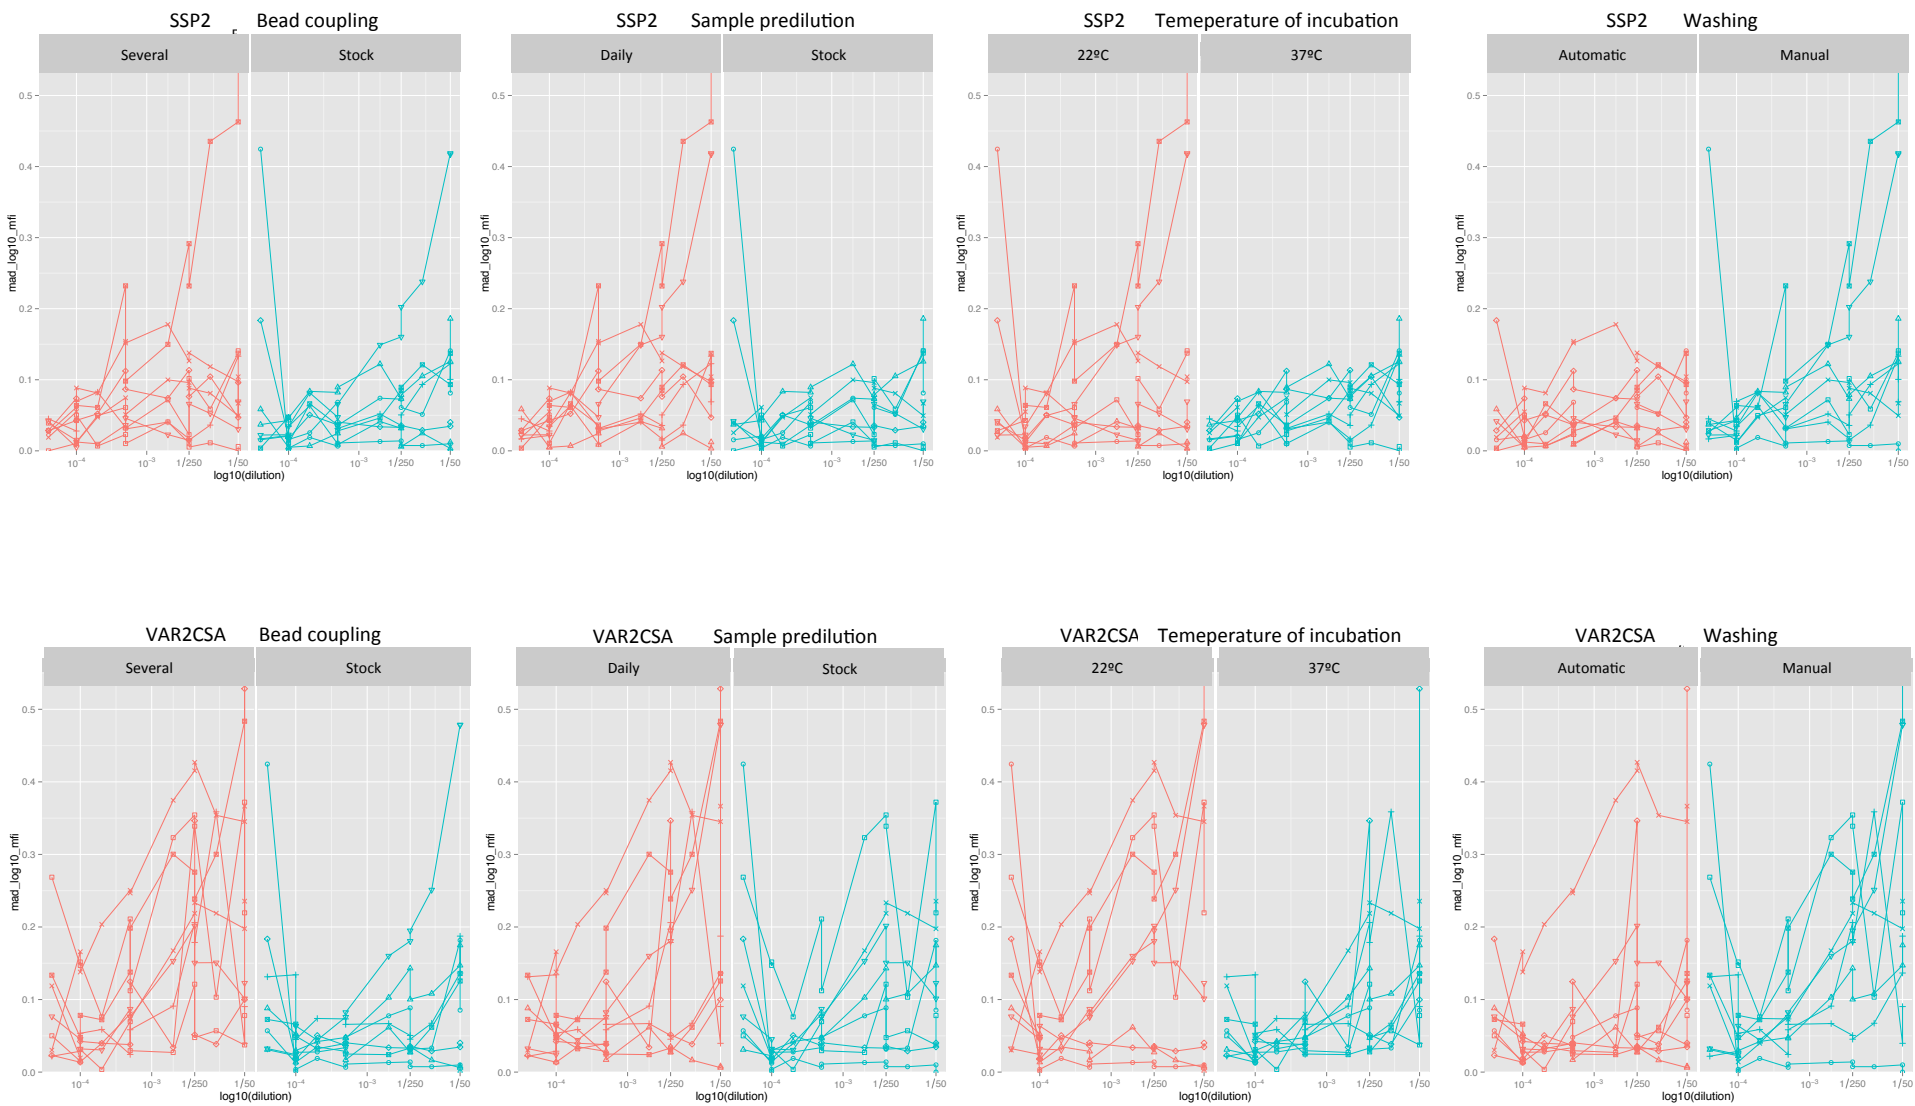

Supplement: Supplementary file 1 [file 1 › pone.0199278.s005.pdf]
